# Supplementary material for: Synthesis of disulfides tethered pyrroles from β-ketothioamides via a bicyclization/ring-opening/oxidative coupling reaction
Source: Royal Society of Chemistry journal article supplement (doi:10.1039/c7ob00655a), 2017-01-01

## Supporting Information

### Synthesis of disulfides tethered pyrroles from $\beta$ -ketothioamides via bicyclization/ring-opening/oxidative coupling reaction

Cong-Xiang Li, Rui-Juan Liu, Kun Yin, Li-Rong Wen\* and Ming Li\*

*State Key Laboratory Base of Eco-Chemical Engineering, College of Chemistry and Molecular Engineering,  
Qingdao University of Science and Technology, Qingdao 266042, China*

*E-mail: [wenlirong@qust.edu.cn](mailto:wenlirong@qust.edu.cn); [liming928@qust.edu.cn](mailto:liming928@qust.edu.cn)*

### Contents

|                                                                                                   |     |
|---------------------------------------------------------------------------------------------------|-----|
| General procedure.....                                                                            | S2  |
| Figure S1. X-Ray structure and crystal data of <b>4a</b> .....                                    | S3  |
| Figure S2. X-Ray structure crystal data of <b>5</b> .....                                         | S4  |
| Characterization data of compounds <b>4</b> , <b>5</b> , <b>6</b> .....                           | S6  |
| <sup>1</sup> H NMR and <sup>13</sup> C NMR Spectra copies of <b>4</b> , <b>5</b> , <b>6</b> ..... | S15 |

## General procedure

### Synthesis of 4

The mixture of thioamides **1** (0.6 mmol), ethyl 2-cyanoacetate **2** (0.6 mmol), arylglyoxals **3** (0.6 mmol) and EtOH (2 mL) was stirred at 50 °C in a 25 mL flask for the indicated time until complete consumption of starting materials as monitored by TLC (petroleum ether/EtOAc, 1:2, v/v). After completion of the reaction, the solid product was filtered, washed with EtOH, and subsequently dried and recrystallized with EtOH to give the pure product **4**.

### Synthesis of 5

Under O<sub>2</sub>, a 20 mL of Schlenk tube equipped with a stir bar was charged with disulfides (0.2 mmol), AIBN (0.3 mmol), CuI (0.04 mmol), KHCO<sub>3</sub> (0.2 mmol) and CH<sub>3</sub>CN (2 mL). The tube was sealed with a Teflon lined cap. The reaction mixture was stirred at 100 °C for 12 h. After the completion of the reaction (monitored by TLC), the solvent was concentrated under vacuum and the residue was purified by flash column chromatography on silica gel with petroleum ether-ethyl acetate as the eluent to give the desired product **5**.

### Synthesis of 6

To a stirred solution of **1a** (0.6 mmol), **2a** (0.6 mmol) and **3** (0.6 mmol) in EtOH (2 mL) was added DIPEA (0.3 mmol) and then the reaction mixture was stirred at room temperature for 1.5 h. After completion of the reaction as monitored by TLC (petroleum ether/EtOAc, 4:1, v/v), amounts of solid were precipitated. The reaction mixture was filtered, washed with EtOH, and subsequently dried to give the pure product **6**.

**Diethyl 2,2'-(disulfanediy)bis(4-benzoyl-1,2-diphenyl-1*H*-pyrrole-5,3-diyl))bis(3-amino-3-oxopropanoate) (4a) (CCDC 950534)**

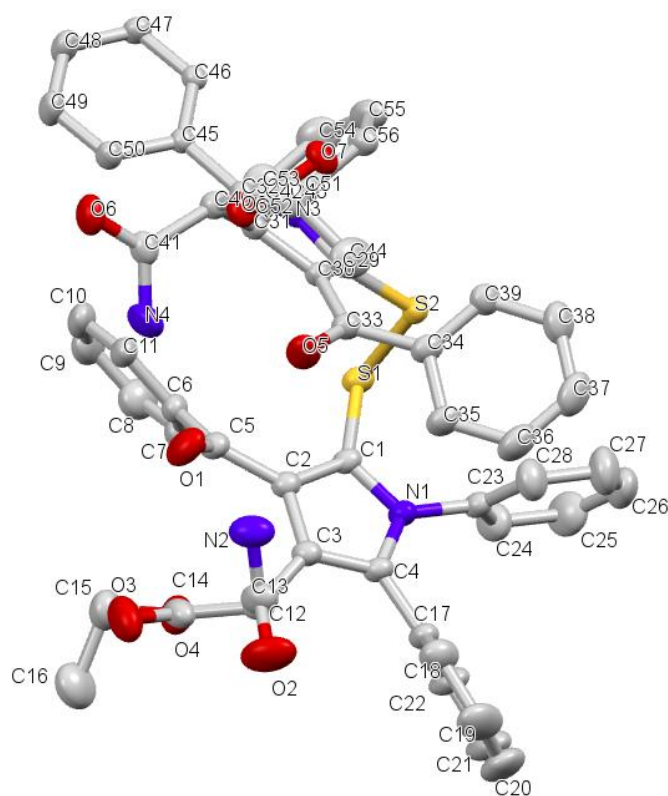

**Figure S1.** X-Ray crystal structure of **4a** with 25% probability displacement ellipsoids.

**Table S1.** Crystal Data and Structure Refinement for **4a**

|                                          |                                                                                                                                                                              |
|------------------------------------------|------------------------------------------------------------------------------------------------------------------------------------------------------------------------------|
| Chemical formula                         | C <sub>31</sub> H <sub>26</sub> ClNO <sub>3</sub> S                                                                                                                          |
| Color / shape                            | Yellow / Plate                                                                                                                                                               |
| Formula weight                           | 967.09                                                                                                                                                                       |
| Temperature, K                           | 296(2)                                                                                                                                                                       |
| Wavelength, Å                            | 0.71073                                                                                                                                                                      |
| Crystal system,<br>space group           | Triclinic,<br><i>P</i> 2 (1)/ <i>c</i>                                                                                                                                       |
| Unit cell dimensions                     | $a = 11.660(3) \text{ \AA}$ $\alpha = 75.148(11)^\circ$<br>$b = 12.790(2) \text{ \AA}$ $\beta = 83.740(12)^\circ$<br>$c = 20.164(5) \text{ \AA}$ $\gamma = 72.575(13)^\circ$ |
| Volume, Å <sup>3</sup>                   | 2771.6(10)                                                                                                                                                                   |
| Z                                        | 2                                                                                                                                                                            |
| Density (calculated), mg/m <sup>3</sup>  | 1.159                                                                                                                                                                        |
| Absorption coefficient, mm <sup>-1</sup> | 0.150                                                                                                                                                                        |
| $\theta$ range for data collection, deg  | 1.05-25.00                                                                                                                                                                   |

|                                                 |                                                   |
|-------------------------------------------------|---------------------------------------------------|
| Limiting indices                                | -13<=h<=13, -15<=k<=15, -23<=l<=23                |
| Reflections collected / unique                  | 29909 / 9737 [R(int) = 0.0563]                    |
| Completeness to theta = 25.00                   | 99.7 %                                            |
| Absorption correction                           | Semi-empirical from equivalents                   |
| Max. and min. transmission                      | 1.000, 0.7413                                     |
| Data / restraints / parameters                  | 9737 / 126 / 674                                  |
| Goodness-of-fit on F <sup>2</sup>               | 1.081                                             |
| Final R indices [I>2σ(I)]                       | R <sub>1</sub> = 0.0710, wR <sub>2</sub> = 0.1810 |
| R indices (all data)                            | R <sub>1</sub> = 0.0873, wR <sub>2</sub> = 0.1936 |
| Largest diff. peak and hole, e. Å <sup>-3</sup> | 0.268, -0.314                                     |
| F (000)                                         | 1012.0                                            |

**Ethyl 2-(4-benzoyl-2-(4-fluorophenyl)-1-phenyl-5-thiocyanato-1*H*-pyrrol-3-yl)-2-oxacetate (5)** (CCDC 1430509)

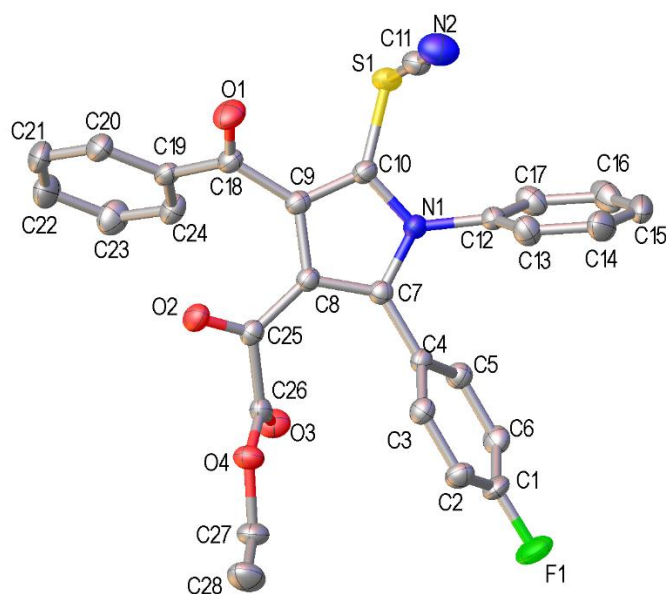

**Figure S2.** X-Ray crystal structure of **5** with 50% probability displacement ellipsoids.

**Table S2.** Crystal Data and Structure Refinement for **5**

|                   |                                                                   |
|-------------------|-------------------------------------------------------------------|
| Empirical formula | C <sub>28</sub> H <sub>19</sub> F N <sub>2</sub> O <sub>4</sub> S |
| Formula weight    | 498.51                                                            |
| Temperature       | 173.1500 K                                                        |
| Wavelength        | 0.71073 Å                                                         |
| Crystal system    | Monoclinic                                                        |

|                                   |                                             |               |
|-----------------------------------|---------------------------------------------|---------------|
| Space group                       | <i>P</i> 1 21/ <i>c</i> 1                   |               |
| Unit cell dimensions              | a = 18.382 (3) Å                            | = 90 °        |
|                                   | b = 12.608 (15) Å                           | = 97.036(3) ° |
|                                   | c = 10.333(3) Å                             | = 90 °        |
| Volume                            | 2376.8(10) Å <sup>3</sup>                   |               |
| Z                                 | 4                                           |               |
| Density (calculated)              | 1.393Mg/m <sup>3</sup>                      |               |
| Absorption coefficient            | 0.183 mm <sup>-1</sup>                      |               |
| F(000)                            | 1032                                        |               |
| Crystal size                      | 0.52 x 0.4 x 0.11 mm <sup>3</sup>           |               |
| Theta range for data collection   | 2.756 to 27.492 °                           |               |
| Index ranges                      | -22<=h<=23, -15<=k<=16, -12<=l<=13          |               |
| Reflections collected             | 16112                                       |               |
| Independent reflections           | 5404 [R(int) = 0.0306]                      |               |
| Completeness to theta = 26.000 °  | 99.1 %                                      |               |
| Absorption correction             | Semi-empirical from equivalents             |               |
| Max. and min. transmission        | 1.0000 and 0.7754                           |               |
| Refinement method                 | Full-matrix least-squares on F <sup>2</sup> |               |
| Data / restraints / parameters    | 5404 / 0 / 326                              |               |
| Goodness-of-fit on F <sup>2</sup> | 1.168                                       |               |
| Final R indices [I>2sigma(I)]     | R1 = 0.0485, wR2 = 0.0899                   |               |
| R indices (all data)              | R1 = 0.0555, wR2 = 0.0939                   |               |
| Extinction coefficient            | n/a                                         |               |
| Largest diff. peak and hole       | 0.433 and -0.250 e.Å <sup>-3</sup>          |               |

---

**Diethyl 2,2'-(disulfanediylbis(4-benzoyl-1,2-diphenyl-1*H*-pyrrole-5,3-diyl))bis(3-amino-3-oxopropanoate) (4a)**

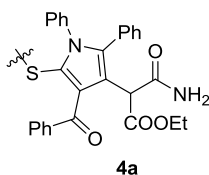

yellow solid, mp:172–174 °C.  $^1\text{H}$  NMR ( $\text{CDCl}_3$ , 500 MHz)  $\delta$ : 1.06 (t,  $J = 7.1$  Hz, 3H,  $\text{CH}_3$ ), 3.87–4.07 (m, 2H,  $\text{CH}_2$ ), 4.45 (s, 1H, CH), 5.56 (d,  $J = 7.3$  Hz, 1H, ArH), 6.04 (s, 1H,  $\text{NH}_2$ ), 6.76 (m, 1H, ArH), 7.11 (t,  $J = 7.4$  Hz, 1H, ArH), 7.19–7.25 (m, 4H, ArH), 7.27–7.31 (m, 3H, ArH), 7.38 (t,  $J = 7.7$  Hz, 2H, ArH), 7.55 (t,  $J = 7.40$  Hz, 1H, ArH), 7.71 (d,  $J = 7.5$  Hz, 2H, ArH), 9.06 (s, 1H,  $\text{NH}_2$ );  $^{13}\text{C}$  NMR ( $\text{CDCl}_3$ , 125 MHz)  $\delta$ : 194.6, 171.0, 168.7, 141.3, 140.3, 136.1, 132.4, 130.9, 130.1, 129.7, 129.3, 128.9, 128.7, 128.3, 128.2, 126.6, 117.7, 61.9, 53.6, 14.0; HRMS (ESI-TOF,  $[\text{M} + \text{H}]^+$ ): calcd for  $\text{C}_{56}\text{H}_{47}\text{N}_4\text{O}_8\text{S}_2$ , 967.2835; found, 967.2846.

**Diethyl 2,2'-(disulfanediylbis(4-(4-fluorobenzoyl)-1,2-diphenyl-1*H*-pyrrole-5,3-diyl))bis(3-amino-3-oxopropanoate) (4b)**

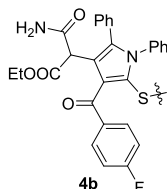

yellow solid, mp:160–162 °C.  $^1\text{H}$  NMR ( $\text{CDCl}_3$ , 500 MHz)  $\delta$ : 1.08 (t,  $J = 7.0$  Hz, 3H,  $\text{CH}_3$ ), 3.87–4.09 (m, 2H,  $\text{CH}_2$ ), 4.44 (s, 1H, CH), 5.66 (s, 1H, ArH), 6.00 (s, 1H,  $\text{NH}_2$ ), 6.86 (s, 1H, ArH), 7.06 (t,  $J = 7.9$  Hz, 2H, ArH), 7.10–7.22 (m, 5H, ArH), 7.26–7.30 (m, 3H, ArH), 7.72–7.75 (m, 2H, ArH), 9.00 (s, 1H,  $\text{NH}_2$ );  $^{13}\text{C}$  NMR ( $\text{CDCl}_3$ , 125 MHz)  $\delta$ : 13.9, 53.3, 61.9, 115.3 (d,  $^2J_{\text{C-F}} = 21.4$  Hz) 117.8, 126.3, 128.3, 1287 (d,  $^3J_{\text{C-F}} = 54.8$  Hz), 129.6, 130.8, 132.6, 136.3 (d,  $^3J_{\text{C-F}} = 63.7$  Hz), 141.4, 165.6 (d,  $^1J_{\text{C-F}} = 255.0$  Hz), 169.8 (d,  $^1J_{\text{C-F}} = 262.3$  Hz), 193.1; HRMS (ESI-TOF,  $[\text{M} + \text{H}]^+$ ): calcd for  $\text{C}_{56}\text{H}_{45}\text{F}_2\text{N}_4\text{O}_8\text{S}_2$ , 1003.2647; found, 1003.2661.

**Diethyl 2,2'-(disulfanediylbis(4-(4-chlorobenzoyl)-1,2-diphenyl-1*H*-pyrrole-5,3-diyl))bis(3-amino-3-oxopropanoate) (4c)**

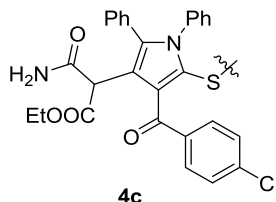

yellow solid, mp: 195–198 °C;  $^1\text{H}$  NMR ( $\text{CDCl}_3$ , 500 MHz)  $\delta$ : 1.09 (t,  $J = 6.9$  Hz, 3H,  $\text{CH}_3$ ), 3.88–4.13 (m, 2H,  $\text{CH}_2$ ), 4.45 (s, 1H, CH), 5.65 (d,  $J = 8.1$  Hz, 1H, ArH), 6.00 (s, 1H,  $\text{NH}_2$ ), 6.92 (s, 1H, ArH), 7.11–7.18 (m, 4H, ArH), 7.27–7.33 (m, 4H, ArH), 7.34–7.36 (m, 2H, ArH), 7.64–7.66 (m, 2H, ArH), 8.98 (s, 1H,  $\text{NH}_2$ );  $^{13}\text{C}$  NMR ( $\text{CDCl}_3$ , 125 MHz)  $\delta$ : 14.0, 53.4, 62.0, 117.8, 126.5, 128.3, 128.5, 128.8, 129.0, 129.1, 129.6, 130.8, 131.4, 136.0, 138.6, 139.2, 141.5, 168.7, 170.8, 193.4; HRMS (ESI-TOF,  $[\text{M} + \text{H}]^+$ ): calcd for  $\text{C}_{56}\text{H}_{45}\text{Cl}_2\text{N}_4\text{O}_8\text{S}_2$ , 1035.2056; found, 1035.2062.

**Diethyl 2,2'-(disulfanediylbis(4-(4-bromobenzoyl)-1,2-diphenyl-1*H*-pyrrole-5,3-diyl)) bis(3-amino-3-oxopropanoate) (4d)**

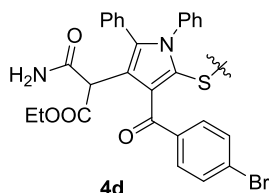

yellow solid, mp: 197–199 °C;  $^1\text{H}$  NMR ( $\text{CDCl}_3$ , 500 MHz)  $\delta$ : 1.09 (t,  $J = 6.9$  Hz, 3H,  $\text{CH}_3$ ), 3.88–4.09 (m, 2H,  $\text{CH}_2$ ), 4.44 (s, 1H, CH), 5.68 (d,  $J = 5.5$  Hz, 1H, ArH), 5.98 (s, 1H,  $\text{NH}_2$ ), 6.96 (s, 1H, ArH), 7.15–7.18 (m, 4H, ArH), 7.30–7.31 (m, 4H, ArH), 7.51–7.58 (m, 4H, ArH), 8.94 (s, 1H,  $\text{NH}_2$ );  $^{13}\text{C}$  NMR ( $\text{CDCl}_3$ , 125 MHz)  $\delta$ : 14.0, 53.3, 61.9, 115.2, 117.9, 126.5, 127.7, 128.2, 128.6, 128.8, 128.9, 129.1, 129.5, 130.8, 131.5, 136.1, 139.1, 141.5, 168.4, 170.7, 193.6; HRMS (ESI-TOF,  $[\text{M} + \text{H}]^+$ ): calcd for  $\text{C}_{56}\text{H}_{45}\text{Br}_2\text{N}_4\text{O}_8\text{S}_2$ , 1123.1046; found, 1123.1072.

**Diethyl 2,2'-(disulfanediylbis(4-(4-methoxybenzoyl)-1,2-diphenyl-1*H*-pyrrole-5,3-diyl)) bis(3-amino-3-oxopropanoate) (4e)**

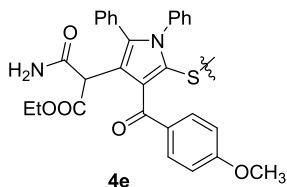

yellow solid, mp: 213–215 °C;  $^1\text{H}$  NMR ( $\text{CDCl}_3$ , 500 MHz)  $\delta$ : 1.06 (t,  $J = 6.9$  Hz, 3H,  $\text{CH}_3$ ), 3.84–4.14 (m, 2H,  $\text{CH}_2$ ), 4.41 (s, 1H, CH), 5.59 (d,  $J = 7.2$  Hz, 1H, ArH), 6.04 (s, 1H,  $\text{NH}_2$ ), 6.75–6.78 (m, 1H, ArH), 6.86–6.88 (m, 2H, ArH), 6.98–7.02 (m, 1H, ArH), 7.11–7.18 (m, 3H, ArH), 7.21–7.24 (m, 2H, ArH), 7.28–7.31 (m, 2H, ArH), 7.69–7.71 (m, 2H, ArH), 9.06 (s, 1H,  $\text{NH}_2$ );  $^{13}\text{C}$  NMR ( $\text{CDCl}_3$ , 125 MHz)  $\delta$ : 14.0, 21.0, 53.6, 55.4, 59.2, 60.4, 61.4, 61.8, 73.5, 113.4, 117.1, 126.0, 128.0, 128.1, 128.3, 128.7, 129.1, 129.7, 130.9, 131.7, 132.5, 132.8, 136.3, 138.8, 141.1, 163.5, 168.8, 171.2, 192.8; HRMS (ESI-TOF,  $[\text{M} + \text{H}]^+$ ): calcd for  $\text{C}_{58}\text{H}_{51}\text{N}_4\text{O}_{10}\text{S}_2$ , 1027.3047; found, 1027.3052.

**Diethyl 2,2'-(disulfanediylbis(4-(4-methylbenzoyl)-1,2-diphenyl-1*H*-pyrrole-5,3-diyl)) bis(3-amino-3-oxopropanoate) (4f)**

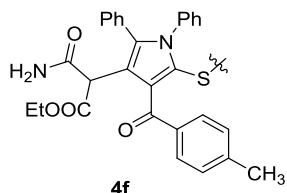

yellow solid, mp: 164–166 °C;  $^1\text{H}$  NMR ( $\text{CDCl}_3$ , 500 MHz)  $\delta$ : 1.05 (t,  $J = 7.1$  Hz, 3H,  $\text{CH}_3$ ), 2.40 (s, 3H,  $\text{CH}_3$ ), 3.81–4.09 (m, 2H,  $\text{CH}_2$ ), 4.41 (s, 1H, CH), 5.58 (d,  $J = 6.3$  Hz, 1H, ArH), 6.02 (s, 1H,  $\text{NH}_2$ ), 6.73 (m, 1H, ArH), 7.10–7.13 (m, 1H, ArH), 7.16–7.19 (m, 6H, ArH), 7.26–7.30 (m, 3H, ArH), 7.60 (d,  $J = 7.6$  Hz, 2H, ArH), 9.05 (s, 1H,  $\text{NH}_2$ );  $^{13}\text{C}$  NMR ( $\text{CDCl}_3$ , 125 MHz)  $\delta$ : 14.0, 14.0, 21.7, 53.6, 61.8, 117.7, 126.3, 128.1, 128.3, 128.7, 128.9, 129.1, 129.5, 129.8, 130.0, 130.3, 130.6, 130.9, 136.3, 137.7, 141.1, 143.4, 168.8, 171.1, 194.1;

HRMS (ESI-TOF,  $[M + H]^+$ ): calcd for  $C_{58}H_{51}N_4O_8S_2$ , 995.3148; found, 995.3165.

**Diethyl 2,2'-(disulfanediy)bis(4-(2-bromobenzoyl)-1,2-diphenyl-1H-pyrrole-5,3-diyl))bis(3-amino-3-oxopropanoate) (4g)**

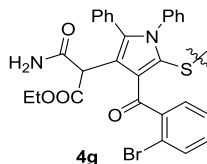

yellow solid, mp: 155–157 °C;  $^1H$  NMR ( $CDCl_3$ , 500 MHz)  $\delta$ : 1.20 (s, 3H,  $CH_3$ ), 4.15 (s, 2H,  $CH_2$ ), 4.58 (s, 1H, CH), 5.60 (s, 1H,  $NH_2$ ), 5.60- 6.96 (m, 3H, ArH), 7.17-7.26 (m, 8H, ArH), 7.26–7.56 (m, 3H, ArH,  $NH_2$ ), 8.57 (s, 1H,  $NH_2$ );  $^{13}C$  NMR ( $CDCl_3$ , 125 MHz)  $\delta$ : 14.4, 62.0, 127.5, 128.1, 128.2, 129.1, 130.2, 131.2, 133.3, 136.5, 141.1, 142.4, 169.2, 170.3, 193.6; HRMS (ESI-TOF,  $[M + H]^+$ ): calcd for  $C_{56}H_{45}Br_2N_4O_8S_2$ , 1123.10401; found, 1123.10388.

**Diethyl 2,2'-(disulfanediy)bis(4-(3-chlorobenzoyl)-1,2-diphenyl-1H-pyrrole-5,3-diyl))bis(3-amino-3-oxopropanoate) (4h)**

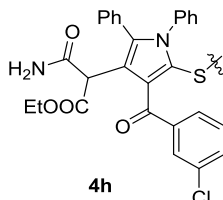

yellow solid, mp: 161–162 °C;  $^1H$  NMR ( $CDCl_3$ , 500 MHz)  $\delta$ : 1.09 (t,  $J = 7.0$  Hz, 1H,  $CH_3$ ), 3.86–4.08 (m, 2H,  $CH_2$ ), 4.45 (s, 1H, CH), 5.68 (s, 1H, ArH), 6.01 (s, 1H,  $NH_2$ ), 6.84(s, 1H, ArH), 7.14-7.26 (m, 5H, ArH), 7.26–7.33 (m, 4H, ArH), 7.51–7.55 (m, 1H, ArH), 7.59-7.60 (m, 1H, ArH), 7.66 (s, 1H, ArH), 8.80 (s, 1H,  $NH_2$ );  $^{13}C$  NMR ( $CDCl_3$ , 125 MHz)  $\delta$ : 14.0, 14.0, 53.3, 62.0, 117.8, 126.4, 127.7, 128.2, 128.3, 128.5, 128.7, 128.7, 128.9, 129.0, 129.7, 130.2, 131.1, 132.0, 132.4, 134.6, 136.0, 136.2, 141.6, 141.8, 141.9, 168.7, 170.7, 193.4; HRMS (ESI-TOF,  $[M + H]^+$ ): calcd for  $C_{56}H_{45}Cl_2N_4O_8S_2$ , 1035.2056; found, 1035.2075.

**Diethyl 2,2'-(disulfanediy)bis(1,2-diphenyl-4-(thiophene-2-carbonyl)-1H-pyrrole-5,3-diyl))bis(3-amino-3-oxopropanoate) (4i)**

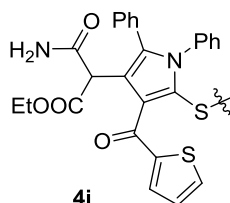

yellow solid, mp: 167–169 °C;  $^1H$  NMR ( $CDCl_3$ , 500 MHz)  $\delta$ : 1.06 (t,  $J = 7.1$  Hz, 3H,  $CH_3$ ), 3.83–4.11 (m, 2H,  $CH_2$ ), 4.39 (s, 1H, CH), 5.79 (s, 1H, ArH), 5.95 (s, 1H,  $NH_2$ ), 6.88 (s, 1H, ArH), 7.09-7.19 (m, 5H, ArH, CH), 7.19-7.26 (m, 4H, ArH), 7.44 (d,  $J = 3.05$  Hz, 1H, ArH), 7.66 (d,  $J = 4.96$  Hz, 1H, CH), 8.68 (s, 1H,  $NH_2$ );  $^{13}C$  NMR ( $CDCl_3$ , 125 MHz)  $\delta$ : 13.9, 14.0, 53.3, 61.8, 117.5, 125.7, 127.5, 127.9, 128.1, 128.3, 128.7, 129.1, 129.2, 129.6, 130.9, 133.8, 135.5, 135.7, 136.4, 141.2, 145.5, 168.7, 170.7, 185.5; HRMS (ESI-TOF,  $[M + H]^+$ ): calcd



for C<sub>52</sub>H<sub>43</sub>N<sub>4</sub>O<sub>8</sub>S<sub>4</sub>, 979.1964; found, 979.1982.

**Diethyl 2,2'-(disulfanediylobis(4-benzoyl-1-(4-chlorophenyl)-2-phenyl-1*H*-pyrrole-5,3-diyl))bis(3-amino-3-oxopropanoate) (4j)**

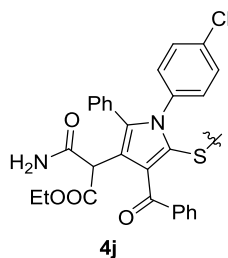

yellow solid, mp: 175–178 °C; <sup>1</sup>H NMR (CDCl<sub>3</sub>, 500 MHz) δ: 1.07 (t, *J* = 7.1 Hz, 3H, CH<sub>3</sub>), 3.84–4.10 (m, 2H, CH<sub>2</sub>), 4.44 (s, 1H, CH), 5.46 (d, *J* = 2.93 Hz, 1H, ArH), 6.09 (s, 1H, NH<sub>2</sub>), 6.74–6.76 (m, 1H, ArH), 7.16–7.26 (m, 4H, ArH), 7.28–7.35 (m, 3H, ArH), 7.40 (t, *J* = 7.7 Hz, 2H, ArH), 7.57 (t, *J* = 7.3 Hz, 1H, ArH), 7.71 (d, *J* = 7.3 Hz, 2H, ArH), 9.03 (s, 1H, NH<sub>2</sub>); <sup>13</sup>C NMR (CDCl<sub>3</sub>, 125 MHz) δ: 14.0, 46.8, 53.4, 61.9, 118.0, 126.3, 128.4, 128.5, 129.0, 129.2, 130.1, 130.5, 130.8, 132.5, 134.4, 134.6, 140.1, 141.3, 168.6, 170.8, 194.4; HRMS (ESI-TOF, [M + H]<sup>+</sup>): calcd for C<sub>56</sub>H<sub>45</sub>Cl<sub>2</sub>N<sub>4</sub>O<sub>8</sub>S<sub>2</sub>, 1035.2056; found, 1035.2052.

**Diethyl 2,2'-(disulfanediylobis(4-benzoyl-1-(4-bromophenyl)-2-phenyl-1*H*-pyrrole-5,3-diyl))bis(3-amino-3-oxopropanoate) (4k)**

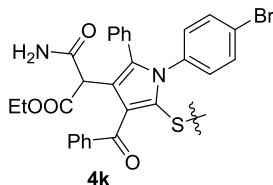

yellow solid, mp: 170–172 °C; <sup>1</sup>H NMR (CDCl<sub>3</sub>, 500 MHz) δ: 1.05 (t, *J* = 6.9 Hz, 3H, CH<sub>3</sub>), 3.84–4.07 (m, 2H, CH<sub>2</sub>), 4.43 (s, 1H, CH), 5.38 (d, *J* = 6.9 Hz, 1H, ArH), 6.06 (s, 1H, NH<sub>2</sub>), 6.89 (d, *J* = 7.30 Hz, 1H, ArH), 7.09 (d, *J* = 7.00 Hz, 1H, ArH), 7.20 (s, 2H, ArH), 7.28–7.36 (m, 3H, ArH), 7.36–7.44 (m, 3H, ArH), 7.55 (t, *J* = 7.18 Hz, 1H, ArH), 7.69 (d, *J* = 6.95 Hz, 2H, ArH), 9.02 (s, 1H, NH<sub>2</sub>); <sup>13</sup>C NMR (CDCl<sub>3</sub>, 125 MHz) δ: 14.0, 53.4, 61.9, 118.1, 122.6, 126.2, 128.3, 128.7, 129.0, 129.3, 130.1, 130.9, 131.2, 131.5, 132.5, 135.2, 140.2, 141.3, 168.6, 170.7, 194.3; HRMS (ESI-TOF, [M + H]<sup>+</sup>): calcd for C<sub>56</sub>H<sub>45</sub>Br<sub>2</sub>N<sub>4</sub>O<sub>8</sub>S<sub>2</sub>, 1123.10401; found, 1123.10425.

**Diethyl 2,2'-(disulfanediylobis(4-benzoyl-1-(4-methoxyphenyl)-2-phenyl-1*H*-pyrrole-5,3-diyl))bis(3-amino-3-oxopropanoate) (4l)**

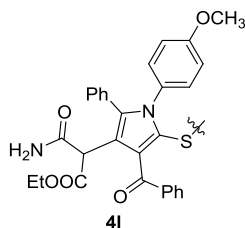

yellow solid, mp: 168–170 °C; <sup>1</sup>H NMR (CDCl<sub>3</sub>, 500 MHz) δ: 1.07 (t, *J* = 7.1 Hz, 3H, CH<sub>3</sub>),

3.70 (s, 3H, OCH<sub>3</sub>), 3.85–4.09 (m, 2H, CH<sub>2</sub>), 4.45 (s, 1H, CH), 5.46 (d,  $J = 7.65$  Hz, 1H, ArH), 6.10 (s, 1H, NH<sub>2</sub>), 6.26 (t,  $J = 4.24$  Hz, 1H, ArH), 6.75 (q,  $J = 3.78$  Hz, 1H, ArH), 7.11 (d,  $J = 7.15$  Hz, 1H, ArH), 7.21 (d,  $J = 7.35$  Hz, 2H, ArH), 7.29–7.34 (m, 3H, ArH), 7.39 (t,  $J = 7.70$  Hz, 2H, ArH), 7.55 (t,  $J = 7.4$  Hz, 1H, ArH), 7.71 (d,  $J = 7.4$  Hz, 2H, ArH), 9.08 (s, 1H, NH<sub>2</sub>); <sup>13</sup>C NMR (CDCl<sub>3</sub>, 125 MHz)  $\delta$ : 14.0, 53.6, 55.2, 61.8, 113.1, 113.3, 117.5, 127.0, 128.2, 128.2, 128.7, 128.8, 129.1, 130.0, 130.3, 130.6, 130.9, 132.3, 140.3, 141.4, 159.0, 168.8, 171.1, 194.7; HRMS (ESI–TOF, [M + H]<sup>+</sup>): calcd for C<sub>58</sub>H<sub>51</sub>N<sub>4</sub>O<sub>10</sub>S<sub>2</sub>, 1027.3047; found, 1027.3030.

**Diethyl 2,2'-(disulfanediylbis(4-benzoyl-2-phenyl-1-(p-tolyl)-1*H*-pyrrole-5,3-diyl))bis(3-amino-3-oxopropanoate) (4m)**

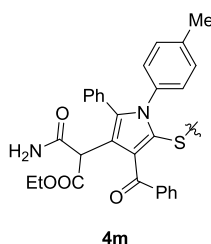

yellow solid, mp: 161–163 °C; <sup>1</sup>H NMR (CDCl<sub>3</sub>, 500 MHz)  $\delta$ : 1.06 (t,  $J = 7.0$  Hz, 3H, CH<sub>3</sub>), 2.19 (s, 3H, CH<sub>3</sub>), 3.84–4.08 (m, 2H, CH<sub>2</sub>), 4.45 (s, 1H, CH), 5.44 (d,  $J = 6.7$  Hz, 1H, ArH), 6.04 (s, 1H, NH<sub>2</sub>), 6.56 (d,  $J = 8.5$  Hz, 1H, ArH), 7.02–7.04 (m, 2H, ArH), 7.20–7.21 (m, 2H, ArH), 7.29–7.30 (m, 3H, ArH), 7.38 (t,  $J = 7.5$  Hz, 2H, ArH), 7.54 (d,  $J = 7.2$  Hz, 1H, ArH), 7.70 (d,  $J = 7.3$  Hz, 2H, ArH), 9.05 (s, 1H, NH<sub>2</sub>); <sup>13</sup>C NMR (CDCl<sub>3</sub>, 125 MHz)  $\delta$ : 13.9, 13.9, 21.0, 53.5, 61.7, 117.6, 126.7, 128.1, 128.2, 128.6, 128.8, 129.0, 129.1, 129.3, 130.0, 130.9, 132.3, 133.6, 133.8, 138.1, 138.2, 140.4, 141.3, 168.7, 170.9, 194.6; HRMS (ESI–TOF, [M + H]<sup>+</sup>): calcd for C<sub>58</sub>H<sub>51</sub>Br<sub>2</sub>N<sub>4</sub>O<sub>8</sub>S<sub>2</sub>, 995.3148; found, 995.3172.

**Diethyl 2,2'-(disulfanediylbis(4-benzoyl-1-(3-chlorophenyl)-2-phenyl-1*H*-pyrrole-5,3-diyl))bis(3-amino-3-oxopropanoate) (4n)**

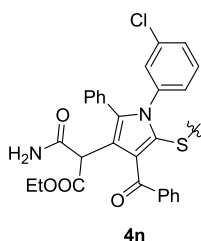

yellow solid, mp: 165–167 °C; <sup>1</sup>H NMR (CDCl<sub>3</sub>, 500 MHz)  $\delta$ : 1.06 (m, 3H, CH<sub>3</sub>), 3.86–4.06 (m, 2H, CH<sub>2</sub>), 4.44 (s, 1H, CH), 6.06 (s, 1H, NH<sub>2</sub>), 6.70 (m, 1H, ArH), 7.12–7.13 (m, 2H, ArH), 7.20 (s, 2H, ArH), 7.33–7.41 (m, 6H, ArH), 7.54–7.61 (m, 1H, ArH), 7.69–7.70 (m, 2H, ArH), 9.00–9.06 (m, 1H, NH<sub>2</sub>); <sup>13</sup>C NMR (CDCl<sub>3</sub>, 125 MHz)  $\delta$ : 13.9, 53.5, 61.9, 117.9, 126.3, 127.6, 129.1, 129.9, 130.9, 132.5, 133.8, 134.0, 137.2, 140.1, 141.3, 168.6, 170.7, 194.4, 194.6; HRMS (ESI–TOF, [M + H]<sup>+</sup>): calcd for C<sub>56</sub>H<sub>45</sub>Cl<sub>2</sub>N<sub>4</sub>O<sub>8</sub>S<sub>2</sub>, 1035.2056; found, 1035.2083.

**Diethyl 2,2'-(disulfanediylbis(4-benzoyl-1-benzyl-2-phenyl-1*H*-pyrrole-5,3-diyl))bis(3-amino-3-oxopropanoate) (4o)**

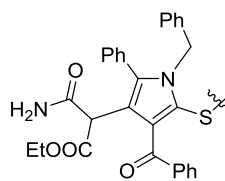

**4o**

yellow solid, mp: 168–170 °C; <sup>1</sup>H NMR (CDCl<sub>3</sub>, 500 MHz) δ: 1.11 (s, 3H, CH<sub>3</sub>), 4.00–4.10 (m, 2H, CH<sub>2</sub>), 4.41 (s, 1H, CH), 4.75–4.89 (m, 2H, CH<sub>2</sub>), 5.24 (s, 1H, NH<sub>2</sub>), 6.60 (s, 2H, ArH), 7.04–7.10 (m, 4H, ArH), 7.26–7.40 (m, 5H, ArH), 7.50 (m, 4H, ArH), 8.47 (s, 1H, NH<sub>2</sub>); <sup>13</sup>C NMR (CDCl<sub>3</sub>, 125 MHz) δ: 13.9, 48.5, 50.6, 52.3, 61.7, 125.5, 127.1, 128.2, 128.5, 129.4, 129.8, 132.3, 137.5, 140.0, 140.6, 169.9, 195.4; HRMS (ESI–TOF, [M+H]<sup>+</sup>): calcd for C<sub>58</sub>H<sub>51</sub>N<sub>4</sub>O<sub>8</sub>S<sub>2</sub>, 995.3148; found, 995.3175.

**Diethyl 2,2'-(disulfanediylbis(4-benzoyl-2-(4-fluorophenyl)-1-phenyl-1*H*-pyrrole-5,3-diyl))bis(3-amino-3-oxopropanoate) (4p)**

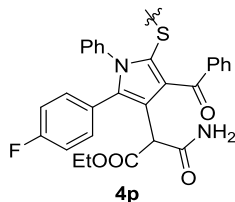

**4p**

yellow solid, mp: 173–175 °C; <sup>1</sup>H NMR (CDCl<sub>3</sub>, 500 MHz) δ: 1.07 (t, *J* = 7.1 Hz, 3H, CH<sub>3</sub>), 3.84–4.10 (m, 2H, CH<sub>2</sub>), 4.41 (s, 1H, CH), 5.52 (d, *J* = 6.8 Hz, 1H, ArH), 6.06 (s, 1H, NH<sub>2</sub>), 6.77–6.80 (m, 1H, ArH), 7.00 (t, *J* = 8.3 Hz, 2H, ArH), 7.12–7.18 (m, 4H, ArH), 7.23–7.24 (m, 1H, ArH), 7.38 (t, *J* = 7.6 Hz, 2H, ArH), 7.57 (t, *J* = 7.4 Hz, 1H, ArH), 7.70 (d, *J* = 7.5 Hz, 2H, ArH), 9.07 (s, 1H, NH<sub>2</sub>); <sup>13</sup>C NMR (CDCl<sub>3</sub>, 125 MHz) δ: 14.0, 53.5, 61.9, 115.4 (d, <sup>2</sup>*J*<sub>C-F</sub> = 21.6 Hz), 117.9, 125.0, 126.7, 128.3, 128.5, 128.8, 129.3, 129.7, 130.1, 132.5, 132.8, 132.9, 136.0, 141.2, 162.8 (d, <sup>1</sup>*J*<sub>C-F</sub> = 249.8 Hz), 169.8 (d, <sup>1</sup>*J*<sub>C-F</sub> = 290.5 Hz), 194.5; HRMS (ESI–TOF, [M + H]<sup>+</sup>): calcd for C<sub>56</sub>H<sub>45</sub>F<sub>2</sub>N<sub>4</sub>O<sub>8</sub>S<sub>2</sub>, 1003.2647; found, 1003.2657.

**Diethyl 2,2'-(disulfanediylbis(4-benzoyl-2-(4-chlorophenyl)-1-phenyl-1*H*-pyrrole-5,3-diyl))bis(3-amino-3-oxopropanoate) (4q)**

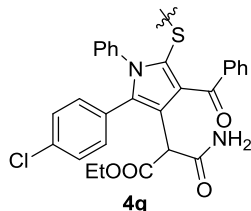

**4q**

yellow solid, mp: 198–200 °C; <sup>1</sup>H NMR (CDCl<sub>3</sub>, 500 MHz) δ: 1.06 (t, *J* = 7.0 Hz, 3H, CH<sub>3</sub>), 3.85–4.10 (m, 2H, CH<sub>2</sub>), 4.40 (s, 1H, CH), 5.51 (d, *J* = 6.9 Hz, 1H, ArH), 6.04 (s, 1H, NH<sub>2</sub>), 6.78–6.81 (m, 1H, ArH), 7.13–7.17 (m, 4H, ArH), 7.24–7.25 (m, 2H, ArH), 7.26–7.28 (m, 1H, ArH), 7.38 (t, *J* = 7.6 Hz, 2H, ArH), 7.68–7.69 (m, 3H, ArH), 9.08 (s, 1H, NH<sub>2</sub>); <sup>13</sup>C NMR (CDCl<sub>3</sub>, 125 MHz) δ: 13.9, 14.0, 14.1, 14.1, 14.2, 21.0, 53.5, 61.8, 61.9, 118.1, 127.0, 127.4,

128.3, 128.4, 128.5, 128.9, 129.3, 129.6, 129.9, 130.0, 132.2, 132.3, 132.5, 135.1, 135.9, 139.9, 140.2, 168.5, 170.8, 171.1, 194.4; HRMS (ESI-TOF,  $[M+H]^+$ ): calcd for  $C_{56}H_{45}Cl_2N_4O_8S_2$ , 1035.20504; found, 1035.20508.

**Diethyl 2,2'-(disulfaneyldibis(4-benzoyl-2-(4-bromophenyl)-1-phenyl-1H-pyrrole-5,3-diyl))bis(3-amino-3-oxopropanoate) (4r)**

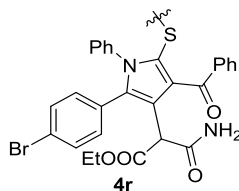

yellow solid, mp: 195–197 °C;  $^1H$  NMR ( $CDCl_3$ , 500 MHz)  $\delta$ : 1.06 (t,  $J = 7.1$  Hz, 3H,  $CH_3$ ), 3.84–4.09 (m, 2H,  $CH_2$ ), 4.39 (s, 1H, CH), 5.51 (d,  $J = 7.1$  Hz, 1H, ArH), 6.04 (s, 1H,  $NH_2$ ), 6.78–6.81 (m, 1H, ArH), 7.07 (d,  $J = 7.6$  Hz, 2H, ArH), 7.14–7.16 (m, 2H, ArH), 7.24–7.25 (m, 1H, ArH), 7.36–7.44 (m, 4H, ArH), 7.57 (t,  $J = 7.4$  Hz, 1H, ArH), 7.68 (d,  $J = 7.5$  Hz, 2H, ArH), 9.08 (s, 1H,  $NH_2$ );  $^{13}C$  NMR ( $CDCl_3$ , 125 MHz)  $\delta$ : 14.0, 53.5, 58.4, 61.9, 62.0, 118.0, 115.8, 123.4, 127.1, 127.9, 128.3, 128.5, 128.6, 128.9, 129.3, 129.6, 129.9, 130.0, 131.5, 132.4, 132.6, 135.9, 140.0, 140.2, 168.5, 170.8, 194.4; HRMS (ESI-TOF,  $[M + H]^+$ ): calcd for  $C_{56}H_{45}Br_2N_4O_8S_2$ , 1123.10401; found, 1123.10400.

**Diethyl 2,2'-(disulfaneyldibis(4-benzoyl-2-(4-methoxyphenyl)-1-phenyl-1H-pyrrole-5,3-diyl))bis(3-amino-3-oxopropanoate) (4s)**

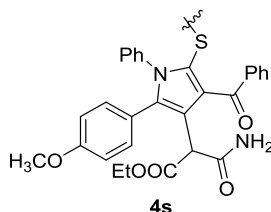

yellow solid, mp: 163–165 °C;  $^1H$  NMR ( $CDCl_3$ , 500 MHz)  $\delta$ : 1.06 (t,  $J = 7.1$  Hz, 3H,  $CH_3$ ), 3.77 (s, 1H,  $OCH_3$ ), 3.83–4.09 (m, 2H,  $CH_2$ ), 4.44 (s, 1H, CH), 5.55 (d,  $J = 7.0$  Hz, 1H, ArH), 6.04 (s, 1H,  $NH_2$ ), 6.80–6.85 (m, 3H, ArH), 7.11–7.24 (m, 5H, ArH), 7.37 (t,  $J = 7.5$  Hz, 2H, ArH), 7.54 (t,  $J = 7.3$  Hz, 1H, ArH), 7.69 (d,  $J = 7.5$  Hz, 2H, ArH), 9.09 (s, 1H,  $NH_2$ );  $^{13}C$  NMR ( $CDCl_3$ , 125 MHz)  $\delta$ : 13.9, 53.7, 55.1, 61.8, 113.7, 117.6, 121.2, 126.4, 128.2, 128.9, 129.4, 129.7, 130.1, 132.3, 136.3, 140.4, 141.3, 159.8, 168.8, 171.1, 194.7; HRMS (ESI-TOF,  $[M + H]^+$ ): calcd for  $C_{58}H_{51}O_{10}N_4S_2$ , 1027.30411; found, 1027.30408.

**Diethyl 2,2'-(disulfaneyldibis(4-benzoyl-2-(3-chlorophenyl)-1-phenyl-1H-pyrrole-5,3-diyl))bis(3-amino-3-oxopropanoate) (4t)**

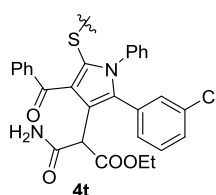

yellow solid, mp: 154–156 °C; <sup>1</sup>H NMR (CDCl<sub>3</sub>, 500 MHz) δ: 1.07 (t, *J* = 6.7 Hz, 3H, CH<sub>3</sub>), 3.86–4.09 (m, 2H, CH<sub>2</sub>), 4.43 (s, 1H, CH), 5.53 (d, *J* = 7.0 Hz, 1H, ArH), 6.05 (s, 1H, NH<sub>2</sub>), 6.79–6.82 (m, 1H, ArH), 7.14–7.17 (m, 5H, ArH), 7.25–7.26 (m, 2H, ArH), 7.39–7.42 (m, 2H, ArH), 7.57–7.60 (m, 1H, ArH), 7.70–7.71 (m, 2H, ArH), 9.01 (s, 1H, NH<sub>2</sub>); <sup>13</sup>C NMR (CDCl<sub>3</sub>, 125 MHz) δ: 13.9, 14.0, 53.4, 62.0, 118.1, 118.2, 127.0, 128.4, 128.4, 128.5, 128.7, 128.8, 128.9, 129.0, 129.0, 129.2, 129.6, 130.0, 130.1, 130.7, 130.8, 130.9, 132.6, 134.0, 135.8, 139.6, 140.1, 168.6, 170.7, 194.4; HRMS (ESI–TOF, [M+H]<sup>+</sup>): calcd for C<sub>56</sub>H<sub>45</sub>Cl<sub>2</sub>N<sub>4</sub>O<sub>8</sub>S<sub>2</sub>, 1035.20504; found, 1035.20508.

**Diethyl 2,2'-(disulfanediylobis(4-benzoyl-1-phenyl-2-(thiophen-2-yl)-1*H*-pyrrole-5,3-diyl))bis(3-amino-3-oxopropanoate) (4u)**

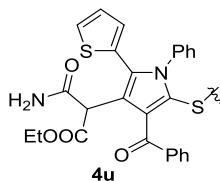

yellow solid, mp: 164–166 °C; <sup>1</sup>H NMR (CDCl<sub>3</sub>, 500 MHz) δ: 1.08 (t, *J* = 7.1 Hz, 3H, CH<sub>3</sub>), 3.85–4.12 (m, 2H, CH<sub>2</sub>), 4.48 (s, 1H, CH), 5.65 (d, *J* = 7.1 Hz, 1H, ArH), 6.02 (s, 1H, NH<sub>2</sub>), 6.86–6.87 (m, 1H, CH), 7.02–7.04 (m, 1H, ArH), 7.19–7.22 (m, 2H, ArH), 7.26–7.30 (m, 3H, ArH), 7.38 (t, *J* = 7.6 Hz, 2H, ArH), 7.56 (t, *J* = 7.4 Hz, 1H, ArH), 7.65 (d, *J* = 7.5 Hz, 2H, CH), 9.02 (s, 1H, NH<sub>2</sub>); <sup>13</sup>C NMR (CDCl<sub>3</sub>, 125 MHz) δ: 13.9, 53.4, 61.9, 119.0, 127.0, 127.4, 128.0, 128.2, 128.4, 128.9, 129.3, 129.4, 129.9, 131.2, 132.4, 134.6, 135.9, 140.2, 168.5, 170.7, 194.5; HRMS (ESI–TOF, [M+H]<sup>+</sup>): calcd for C<sub>52</sub>H<sub>43</sub>N<sub>4</sub>O<sub>8</sub>S<sub>2</sub>, 979.1964; found, 979.1985.

**2,2'-(disulfanediylobis(4-benzoyl-1,2-diphenyl-1*H*-pyrrole-5,3-diyl))bis(2-cyanoacetamide) (4v)**

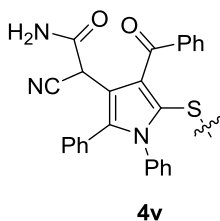

yellow solid, mp: 272–274 °C. <sup>1</sup>H NMR (DMSO, 500 MHz) δ: 4.75 (br s, 1H, NH<sub>2</sub>), 5.09 (br s, 1H, NH<sub>2</sub>), 5.36 (br s, 1H, CH), 6.10–8.11 (m, 15H, ArH); <sup>13</sup>C NMR (DMSO, 125 MHz) δ: 192.2, 165.9, 140.2, 140.0, 136.3, 132.7, 130.9, 130.0, 129.4, 129.3, 128.6, 128.5, 126.1, 117.5, 114.2, 36.3; HRMS (ESI–TOF): calcd for C<sub>52</sub>H<sub>36</sub>N<sub>6</sub>O<sub>4</sub>S<sub>2</sub>Na [M+Na]<sup>+</sup> 895.2132, found 895.2132; calcd for C<sub>52</sub>H<sub>40</sub>N<sub>7</sub>O<sub>4</sub>S<sub>2</sub> [M+NH<sub>4</sub>]<sup>+</sup> 890.2578, found 890.2593.

**2,2'-(disulfanediylobis(4-benzoyl-1,2-diphenyl-1*H*-pyrrole-5,3-diyl))bis(*N*-1-phenylmalonamide) (4w)**

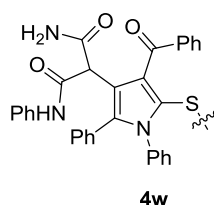

yellow solid, mp: 260-262 °C. <sup>1</sup>H NMR (DMSO, 500 MHz) δ: 4.36 (br s, 1H, CH), 5.46-8.00 (m, 22H, ArH, NH<sub>2</sub>), 9.35-11.41 (m, 1H, NH); <sup>13</sup>C NMR (DMSO, 125 MHz) δ: 40.8, 120.1, 123.7, 128.4, 128.9, 130.2, 131.2, 132.6, 136.8, 139.2, 140.3, 140.7, 167.0, 171.3, 193.5; HRMS (ESI-TOF, [M+H]<sup>+</sup>): calcd for C<sub>64</sub>H<sub>49</sub>N<sub>6</sub>O<sub>6</sub>S<sub>2</sub>, 1061.31495; found 1061.31506.

**Ethyl 2-(4-benzoyl-2-(4-fluorophenyl)-1-phenyl-5-thiocyanato-1H-pyrrol-3-yl)-2-oxacetate (5)**

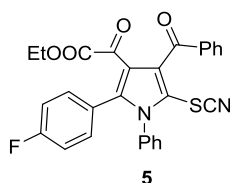

white solid; m.p.: 121-123 °C; <sup>1</sup>H NMR (CDCl<sub>3</sub>, 500 MHz) δ: 1.08 (t, *J* = 7.2 Hz, 3H, CH<sub>3</sub>), 3.80-3.85 (m, 2H, CH<sub>2</sub>), 6.96 (t, *J* = 8.5 Hz, 2H, NH<sub>2</sub>), 7.23-7.26 (m, 4H, ArH), 7.44-7.45 (m, 3H, ArH), 7.54 (t, *J* = 7.6 Hz, 2H, ArH), 7.63-7.66 (m, 1H, ArH), 7.99 (d, *J* = 7.5 Hz, 2H, ArH); <sup>13</sup>C NMR (CDCl<sub>3</sub>, 125 MHz) δ: 13.5, 29.7, 62.5, 108.4, 112.4, 115.3 (d, <sup>2</sup>*J*<sub>C-F</sub> = 21.2 Hz), 120.8, 124.3, 128.9 (d, <sup>1</sup>*J*<sub>C-F</sub> = 14.3 Hz), 129.6, 130.1, 133.0, 133.9, 134.3, 134.9, 137.5, 144.4, 162.3, 164.4, 180.4, 190.9; HRMS (ESI-TOF, [M + H]<sup>+</sup>): calcd for C<sub>28</sub>H<sub>20</sub>FN<sub>2</sub>O<sub>4</sub>S, 499.1122; found, 499.1119.

**Ethyl 2-amino-4-benzoyl-6,6a-diphenyl-5-thioxo-3a,5,6,6a-tetrahydro-4H-furo[2,3-*b*]pyrrole-3-carboxylate (6)**

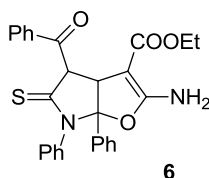

white solid; mp 192–194 °C; <sup>1</sup>H NMR (CDCl<sub>3</sub>, 500 MHz): δ: 0.71 (brs, 3H), 3.90 (brs, 2H), 4.43 (d, *J* = 3.35 Hz, 1H), 5.40 (d, *J* = 2.90 Hz, 1H), 5.86 (s, 2H), 7.11–7.13 (m, 2H), 7.23–7.25 (m, 1H), 7.27–7.32 (m, 3H), 7.35 (t, *J* = 7.50 Hz, 2H), 7.54 (t, *J* = 7.68 Hz, 2H), 7.63 (t, *J* = 7.32 Hz, 1H), 7.75 (d, *J* = 7.45 Hz, 2H), 8.22 (d, *J* = 7.60 Hz, 2H); <sup>13</sup>C NMR (CDCl<sub>3</sub>, 125 MHz) δ: 13.8, 54.0, 59.1, 68.4, 77.9, 111.0, 126.4, 128.4, 128.6, 128.7, 128.9, 129.2, 130.1, 133.6, 136.8, 137.1, 137.5, 164.1, 166.5, 197.4, 202.9; HRMS (ESI-TOF, [M + H]<sup>+</sup>): calcd for C<sub>28</sub>H<sub>25</sub>N<sub>2</sub>O<sub>4</sub>S, 485.1530; found, 485.1545.



4a (in DMSO)

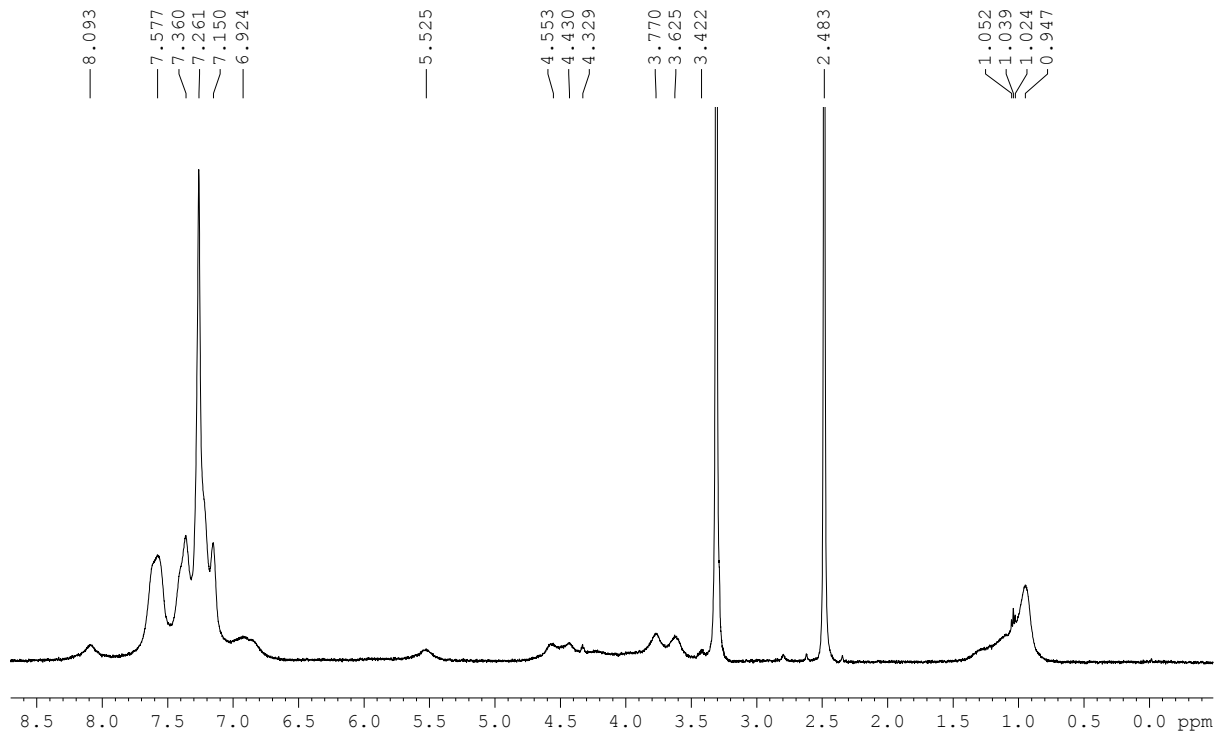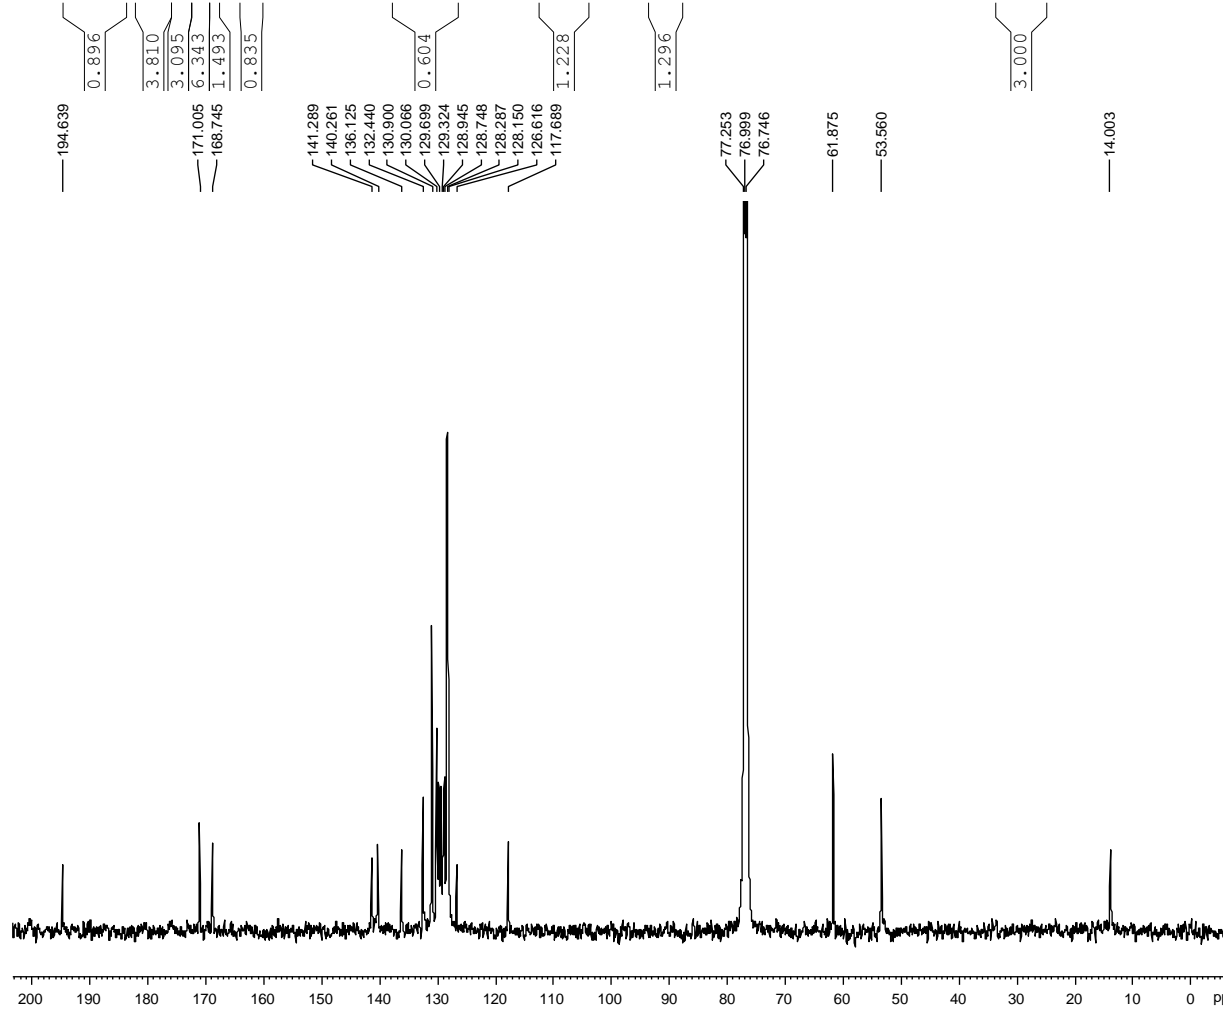



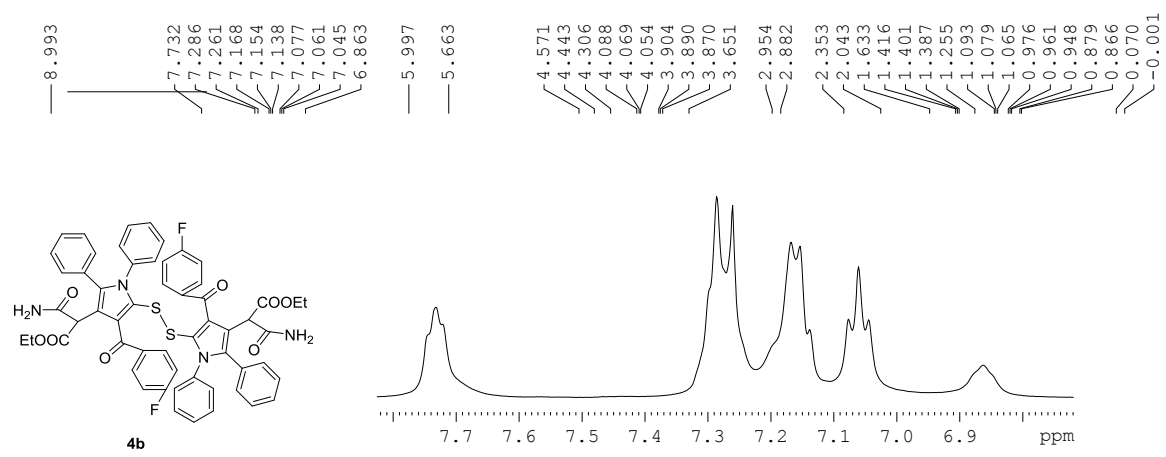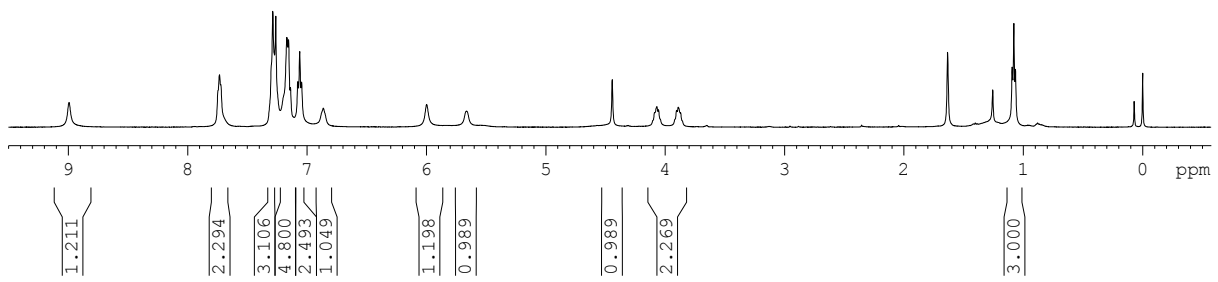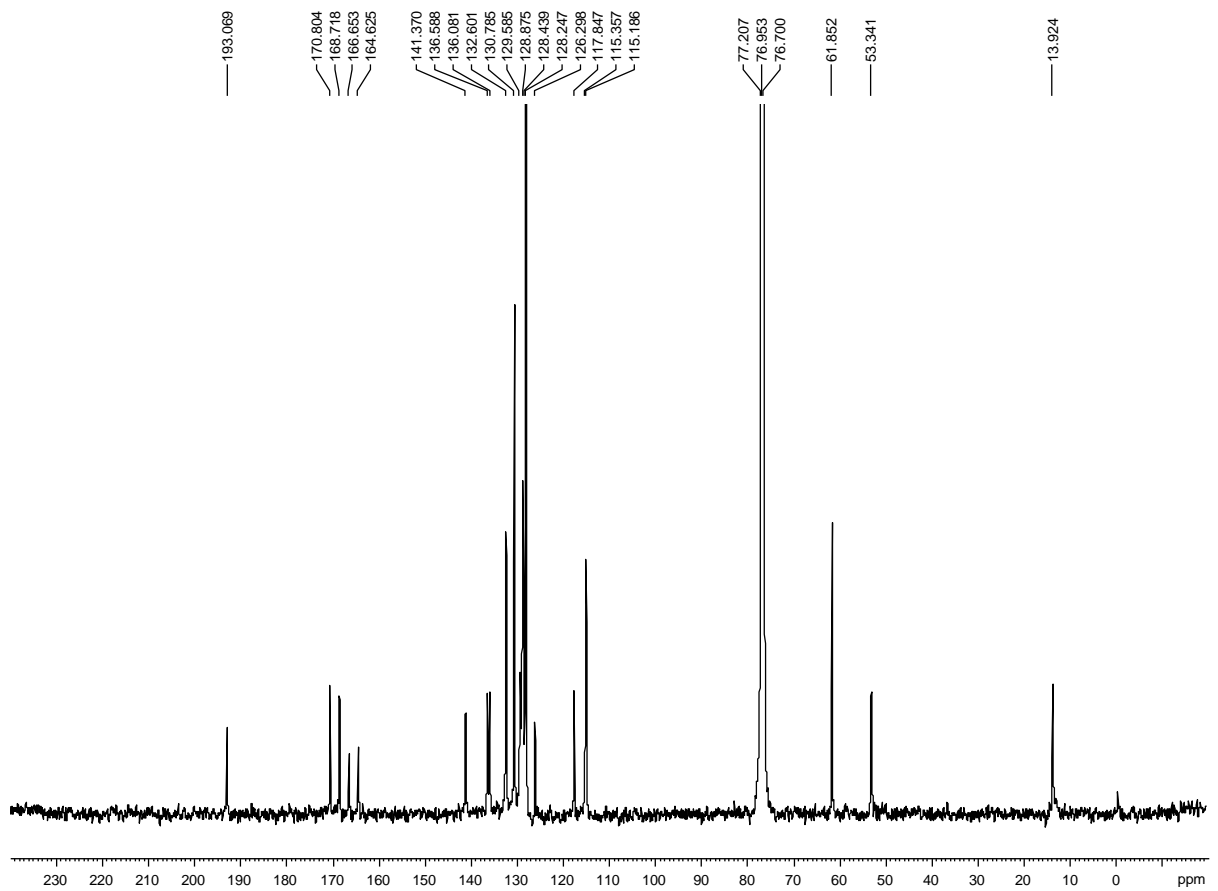

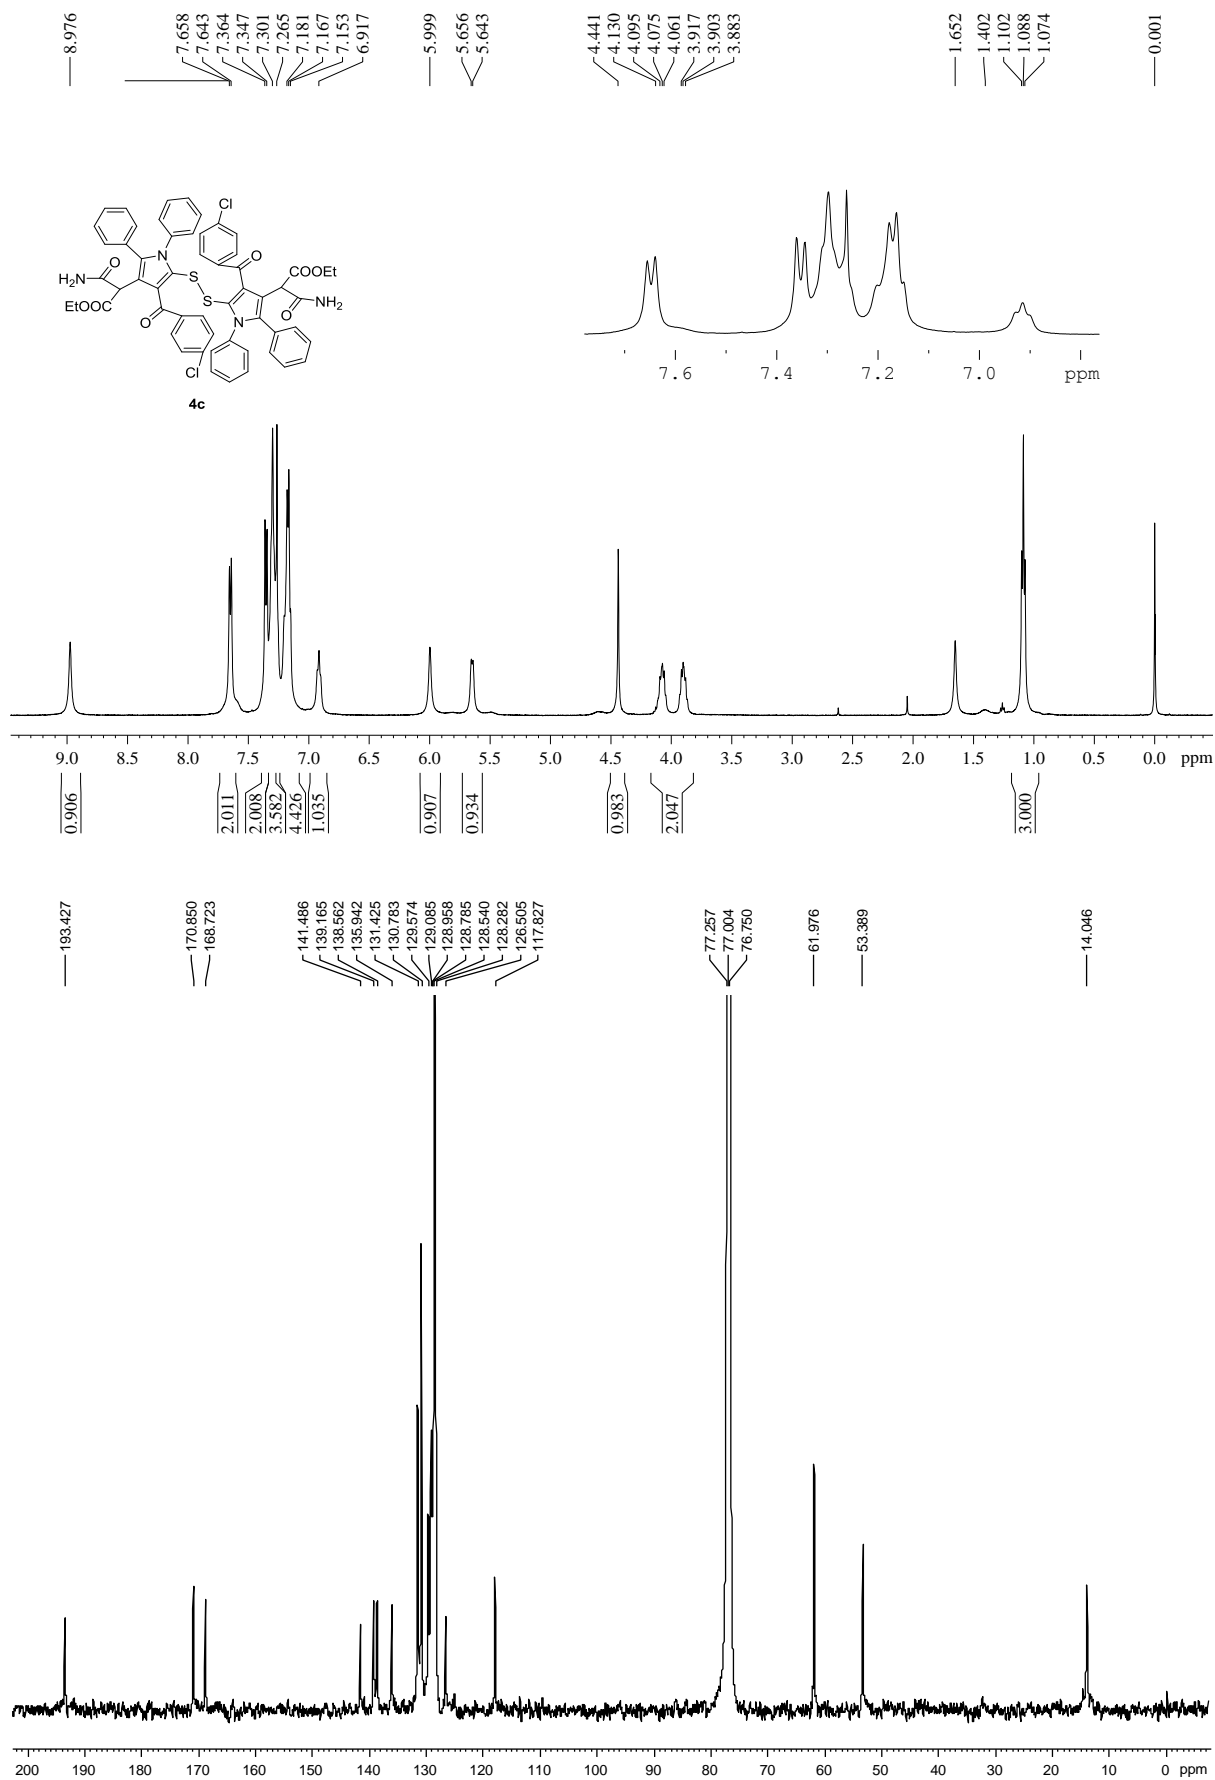

8.939  
 7.577  
 7.561  
 7.529  
 7.512  
 7.308  
 7.297  
 7.262  
 7.181  
 7.167  
 7.152  
 6.959  
 5.982  
 5.681  
 4.444  
 4.089  
 4.069  
 4.055  
 3.916  
 3.902  
 3.882  
 2.859  
 1.714  
 1.101  
 1.087  
 1.073  
 0.000

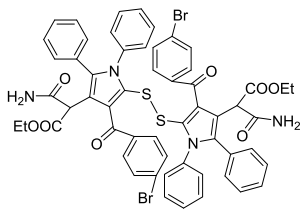

4d

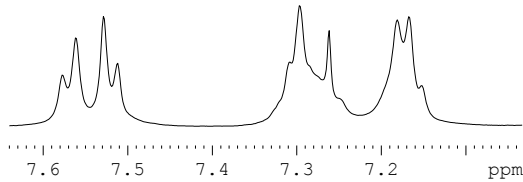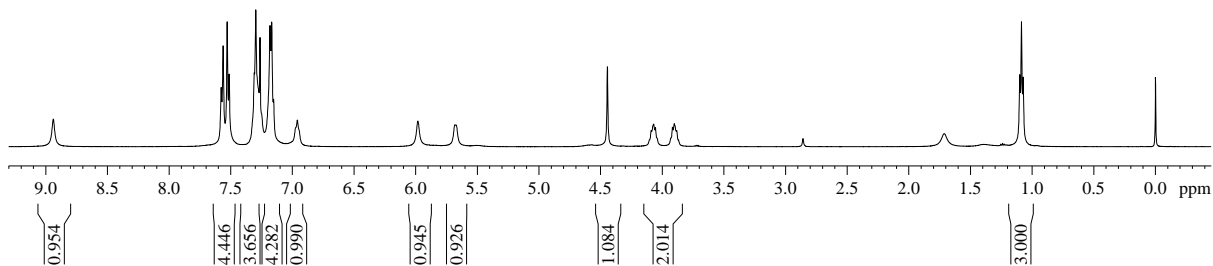

193.572  
 170.687  
 168.643  
 141.535  
 139.083  
 136.086  
 131.523  
 130.842  
 129.548  
 129.126  
 128.825  
 128.599  
 128.222  
 127.695  
 126.528  
 117.924  
 61.908  
 53.278  
 14.025

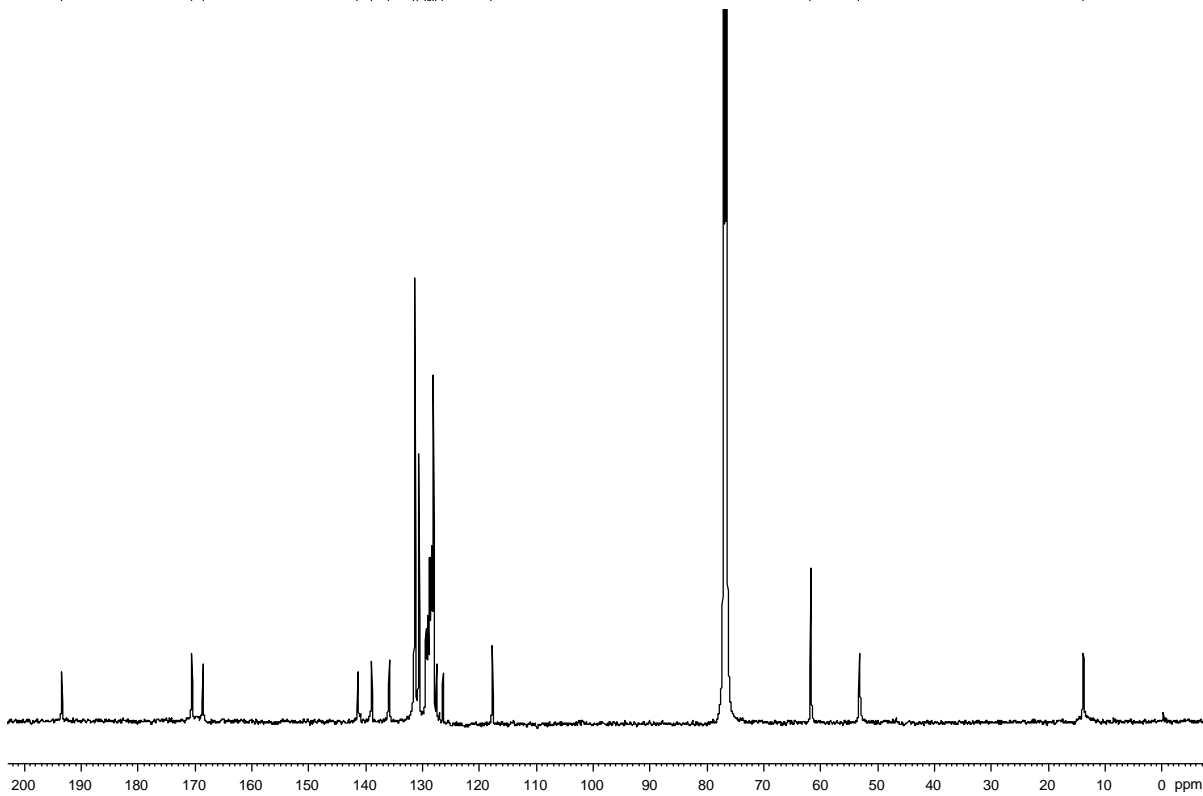



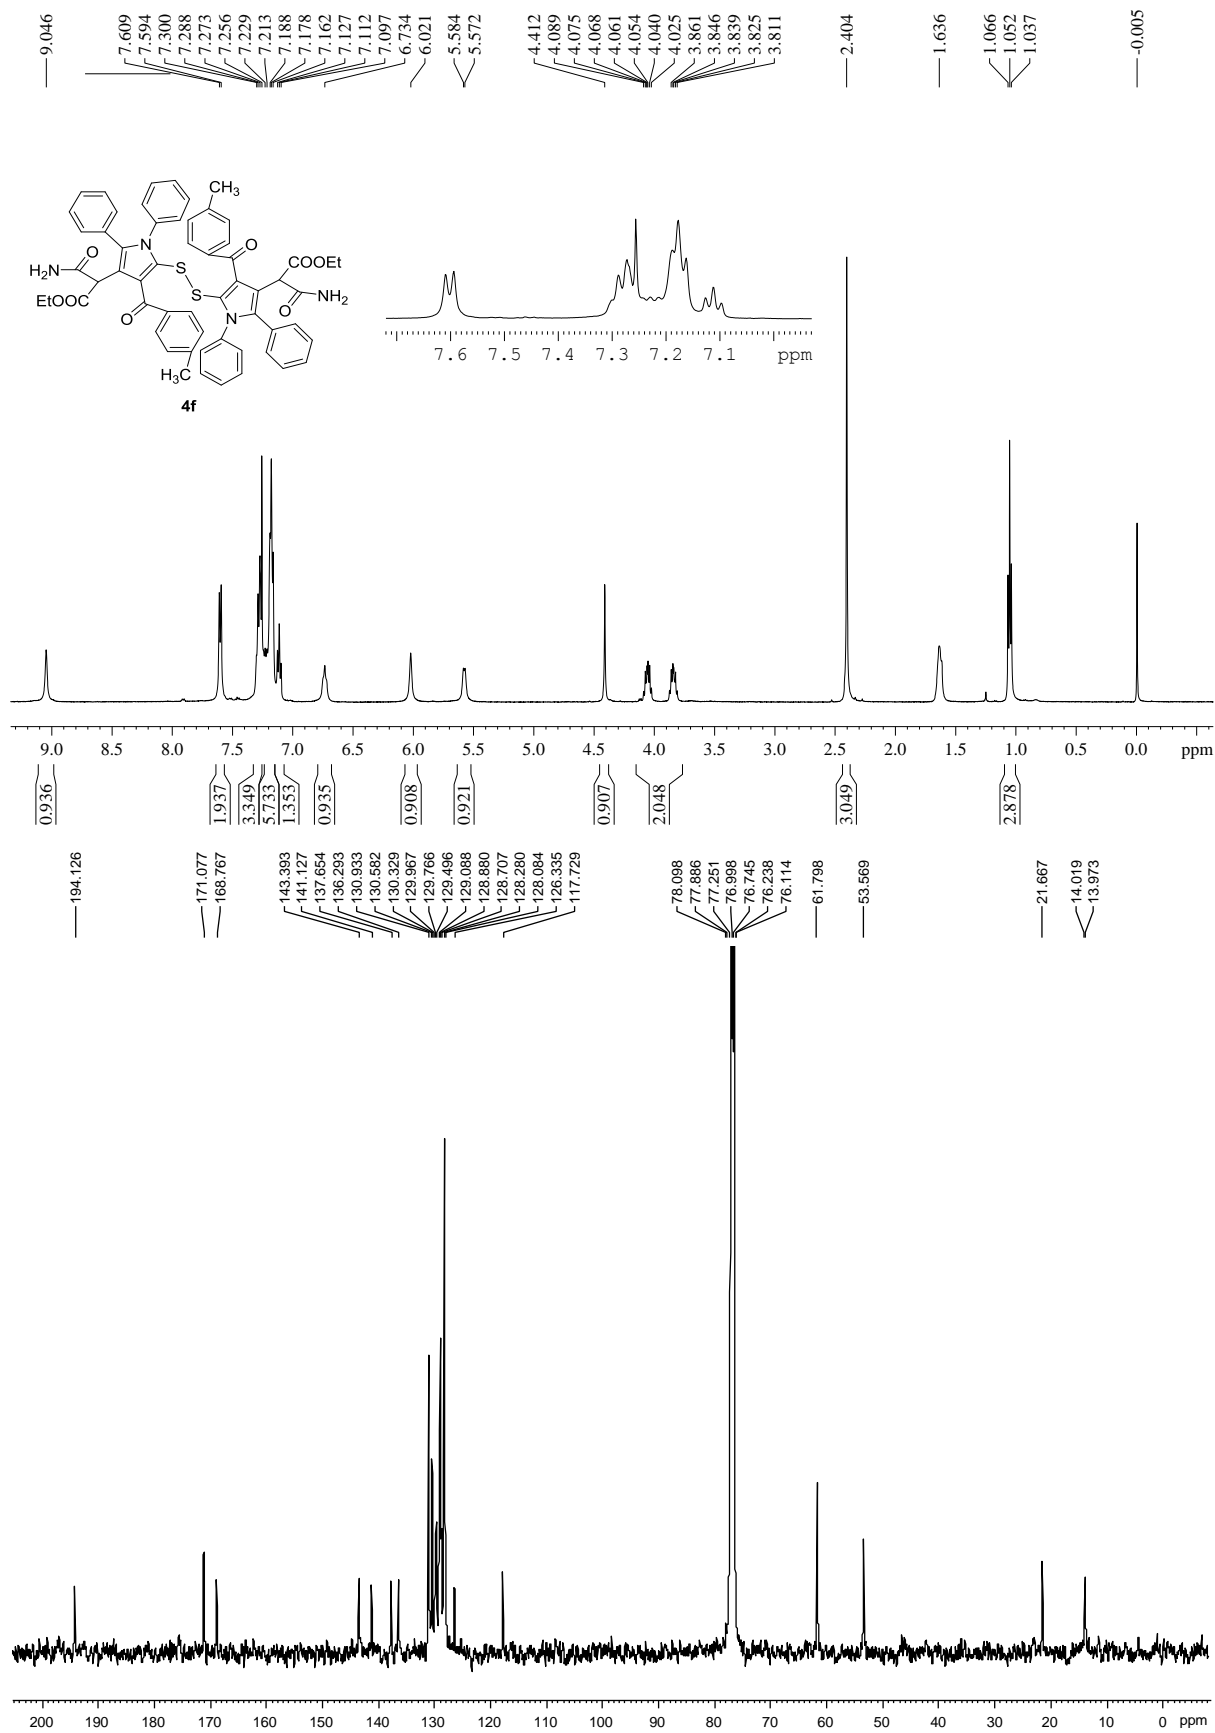

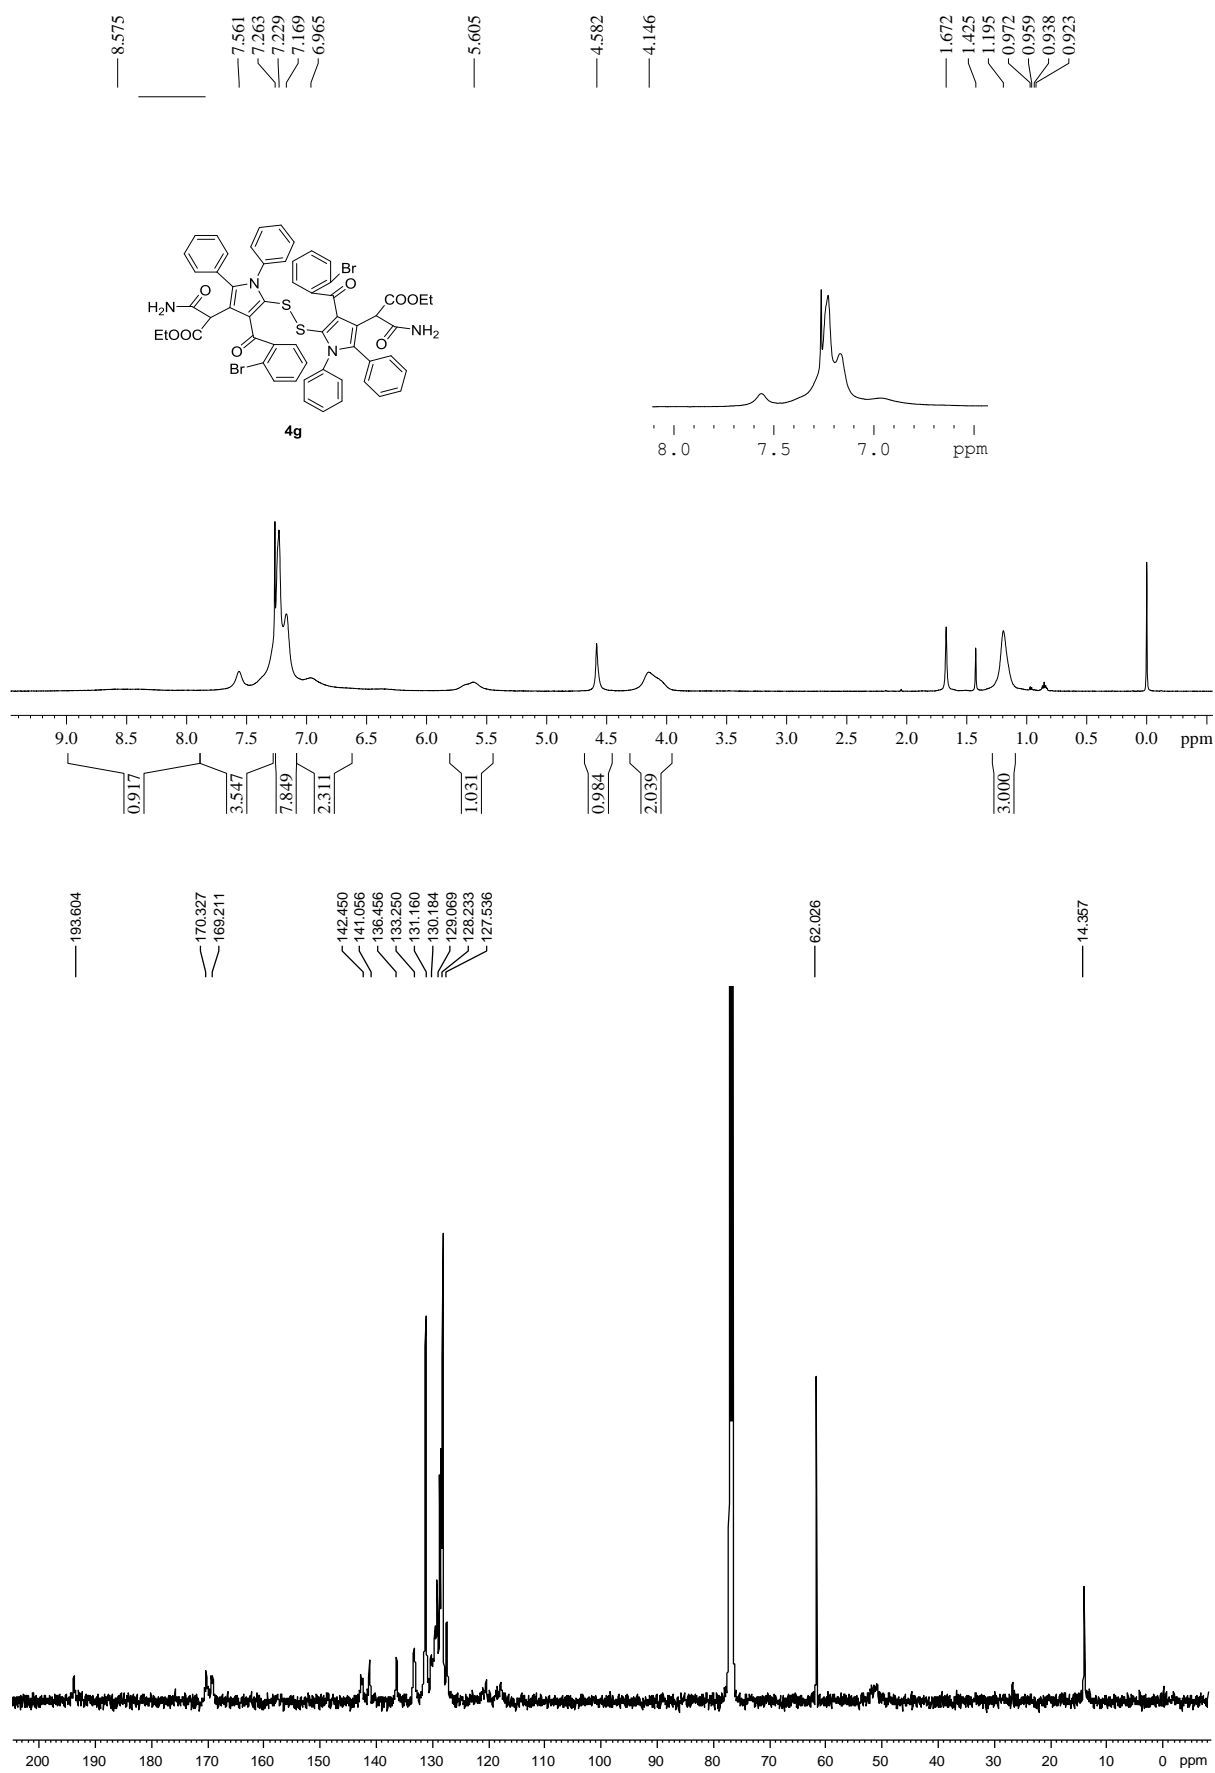

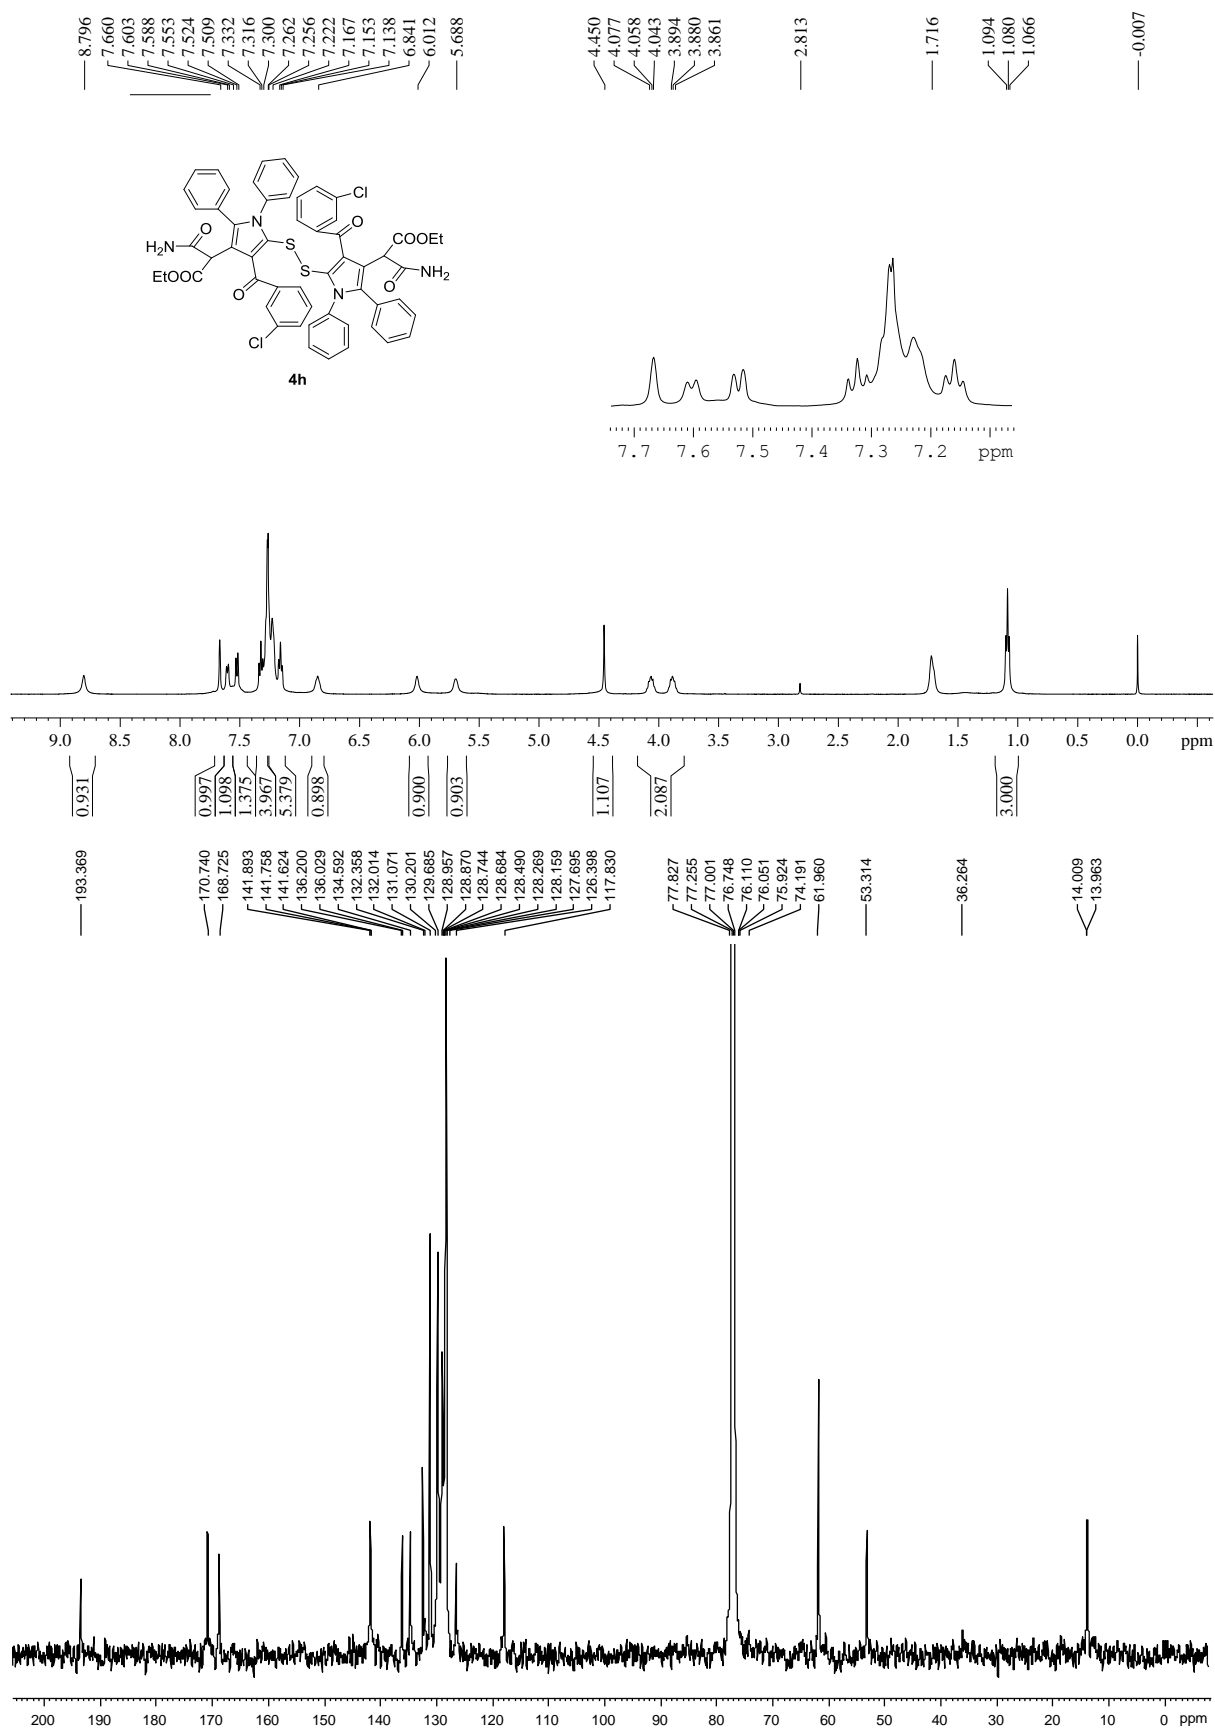

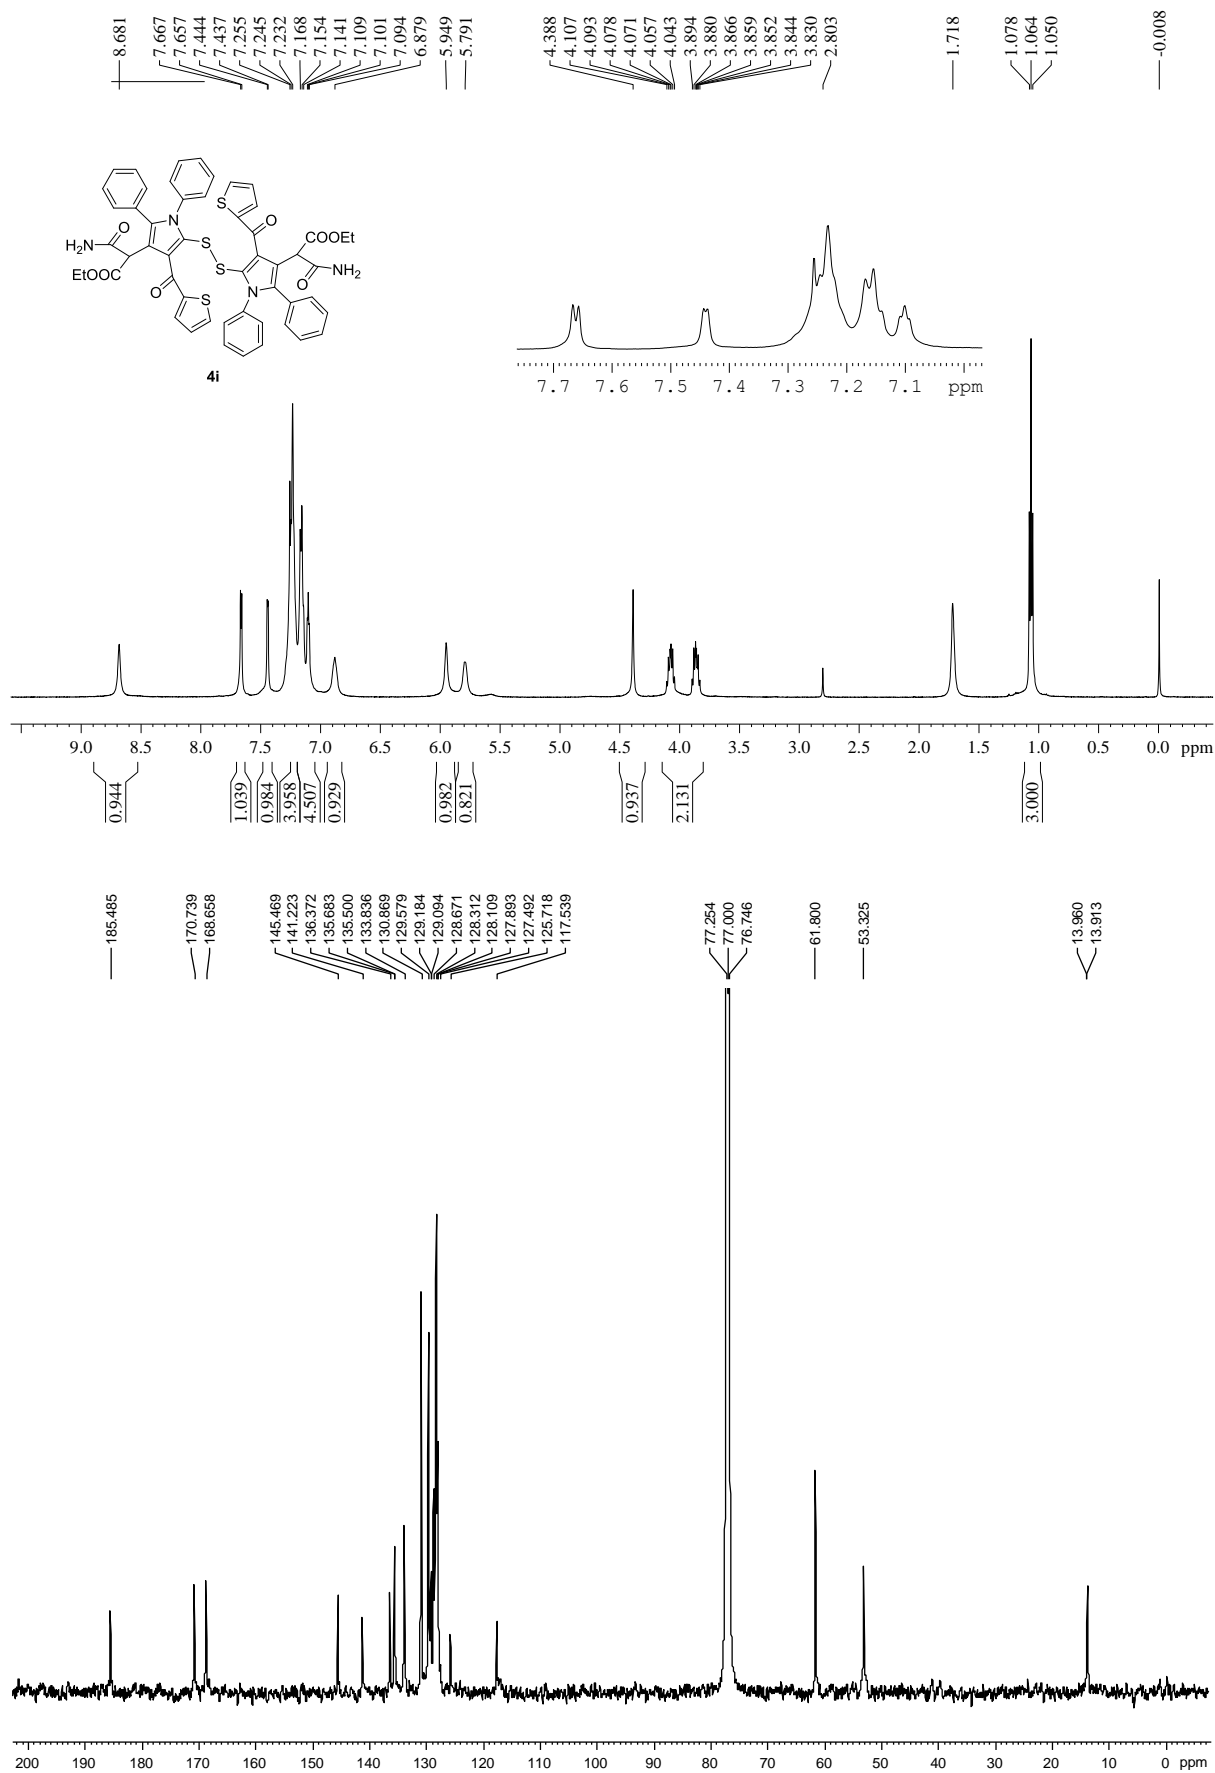



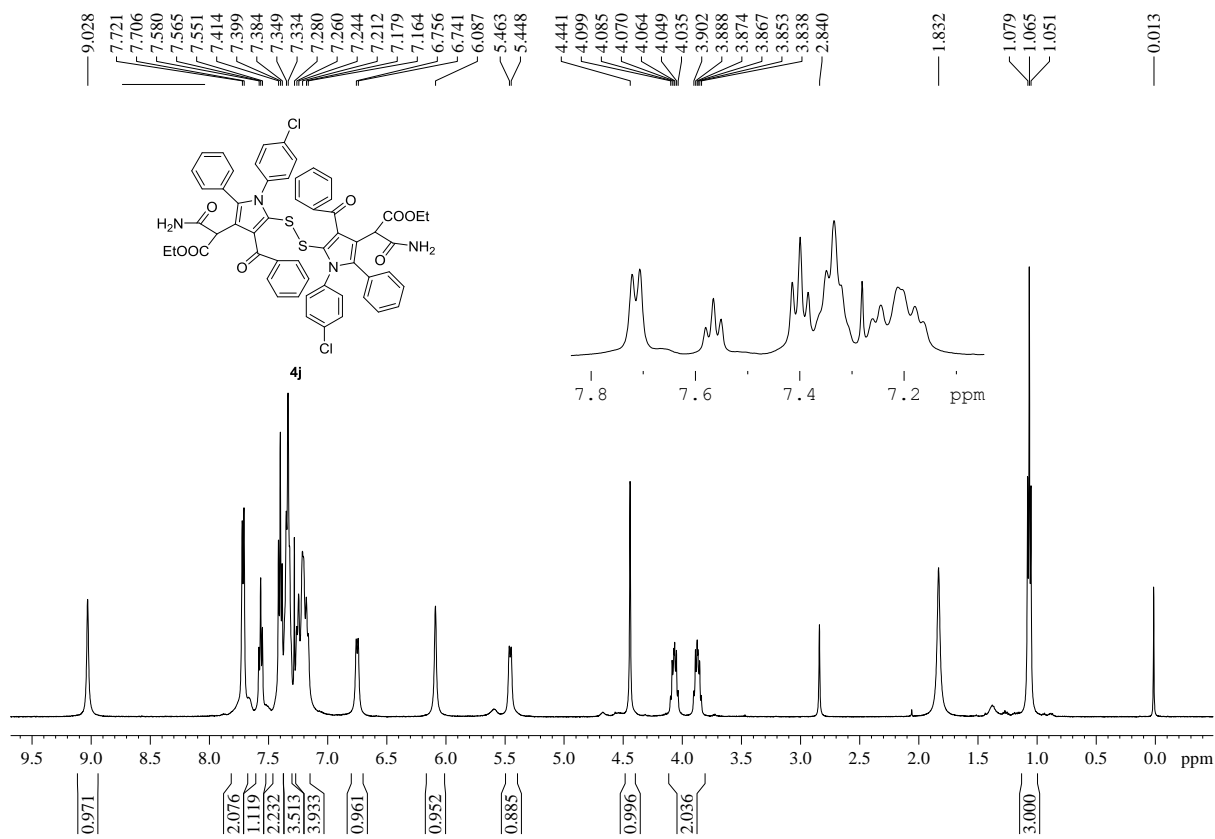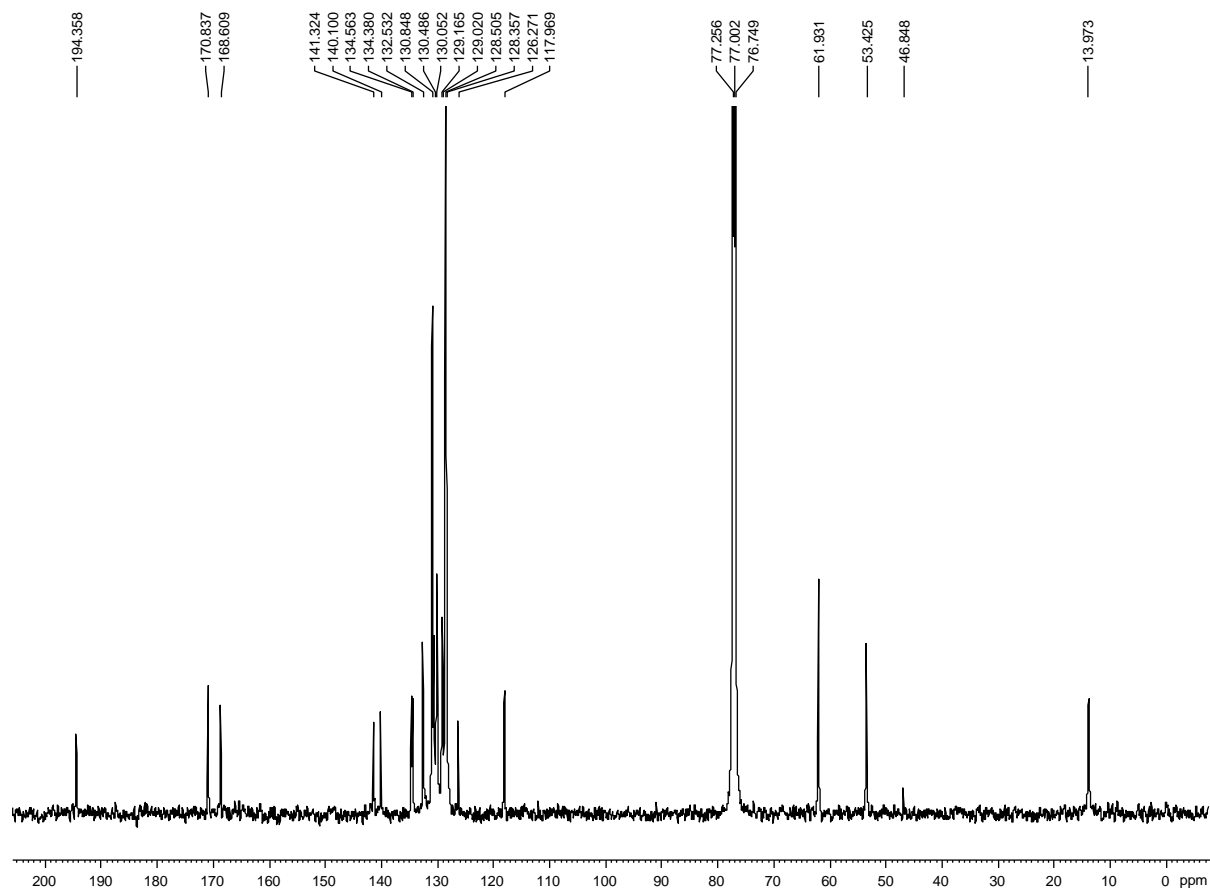

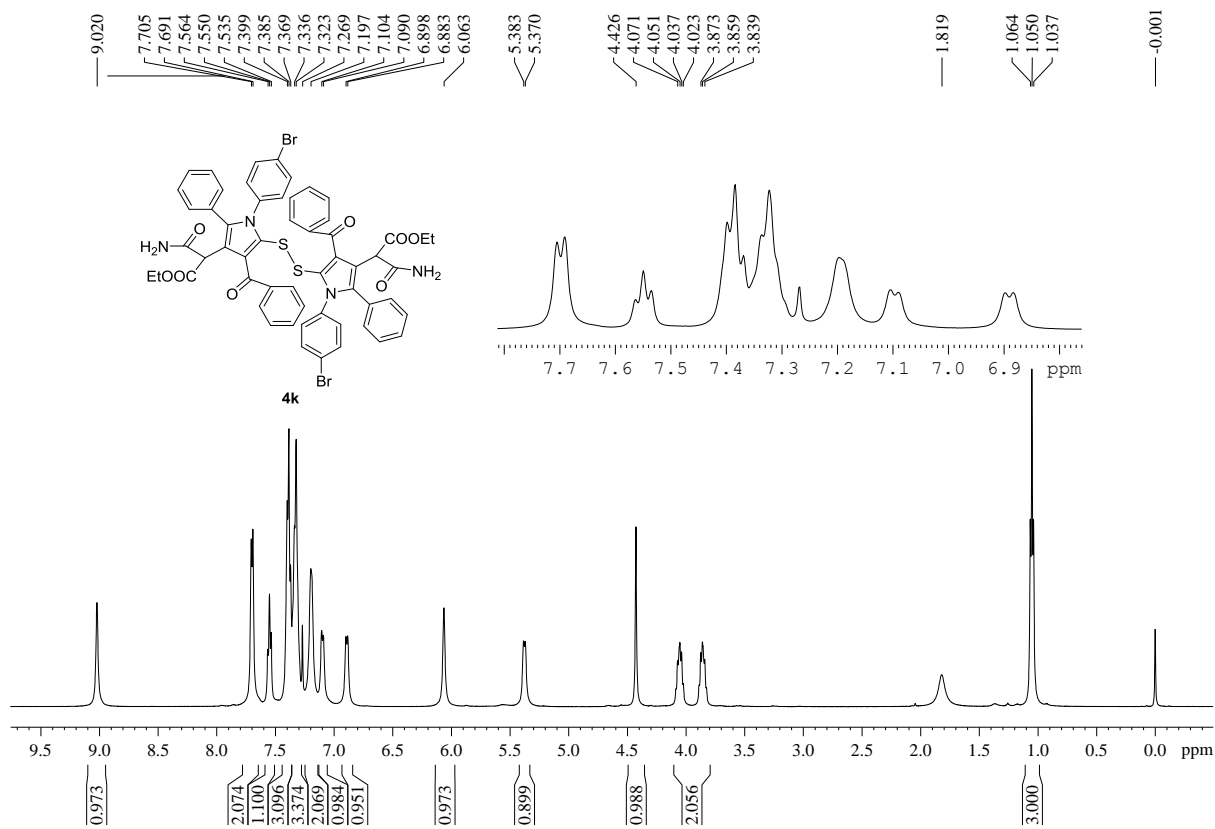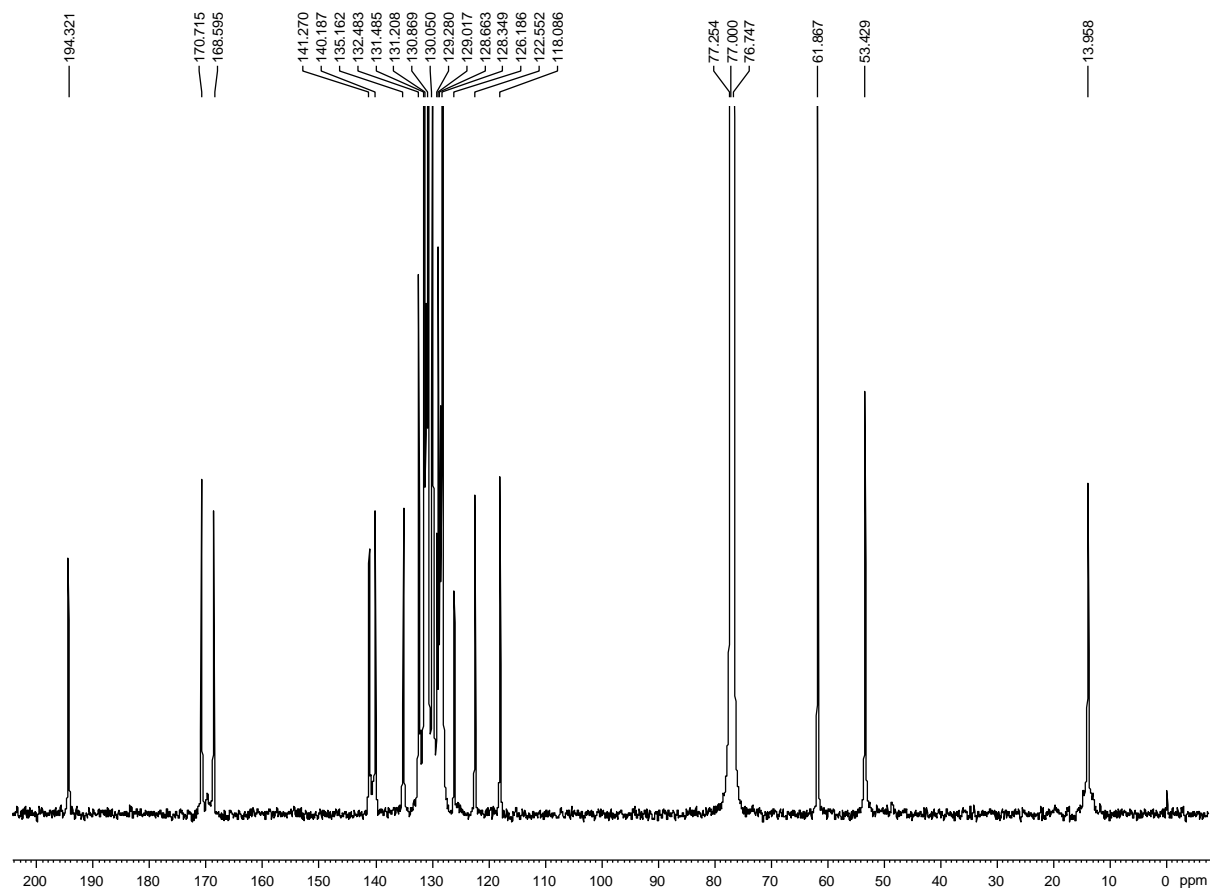

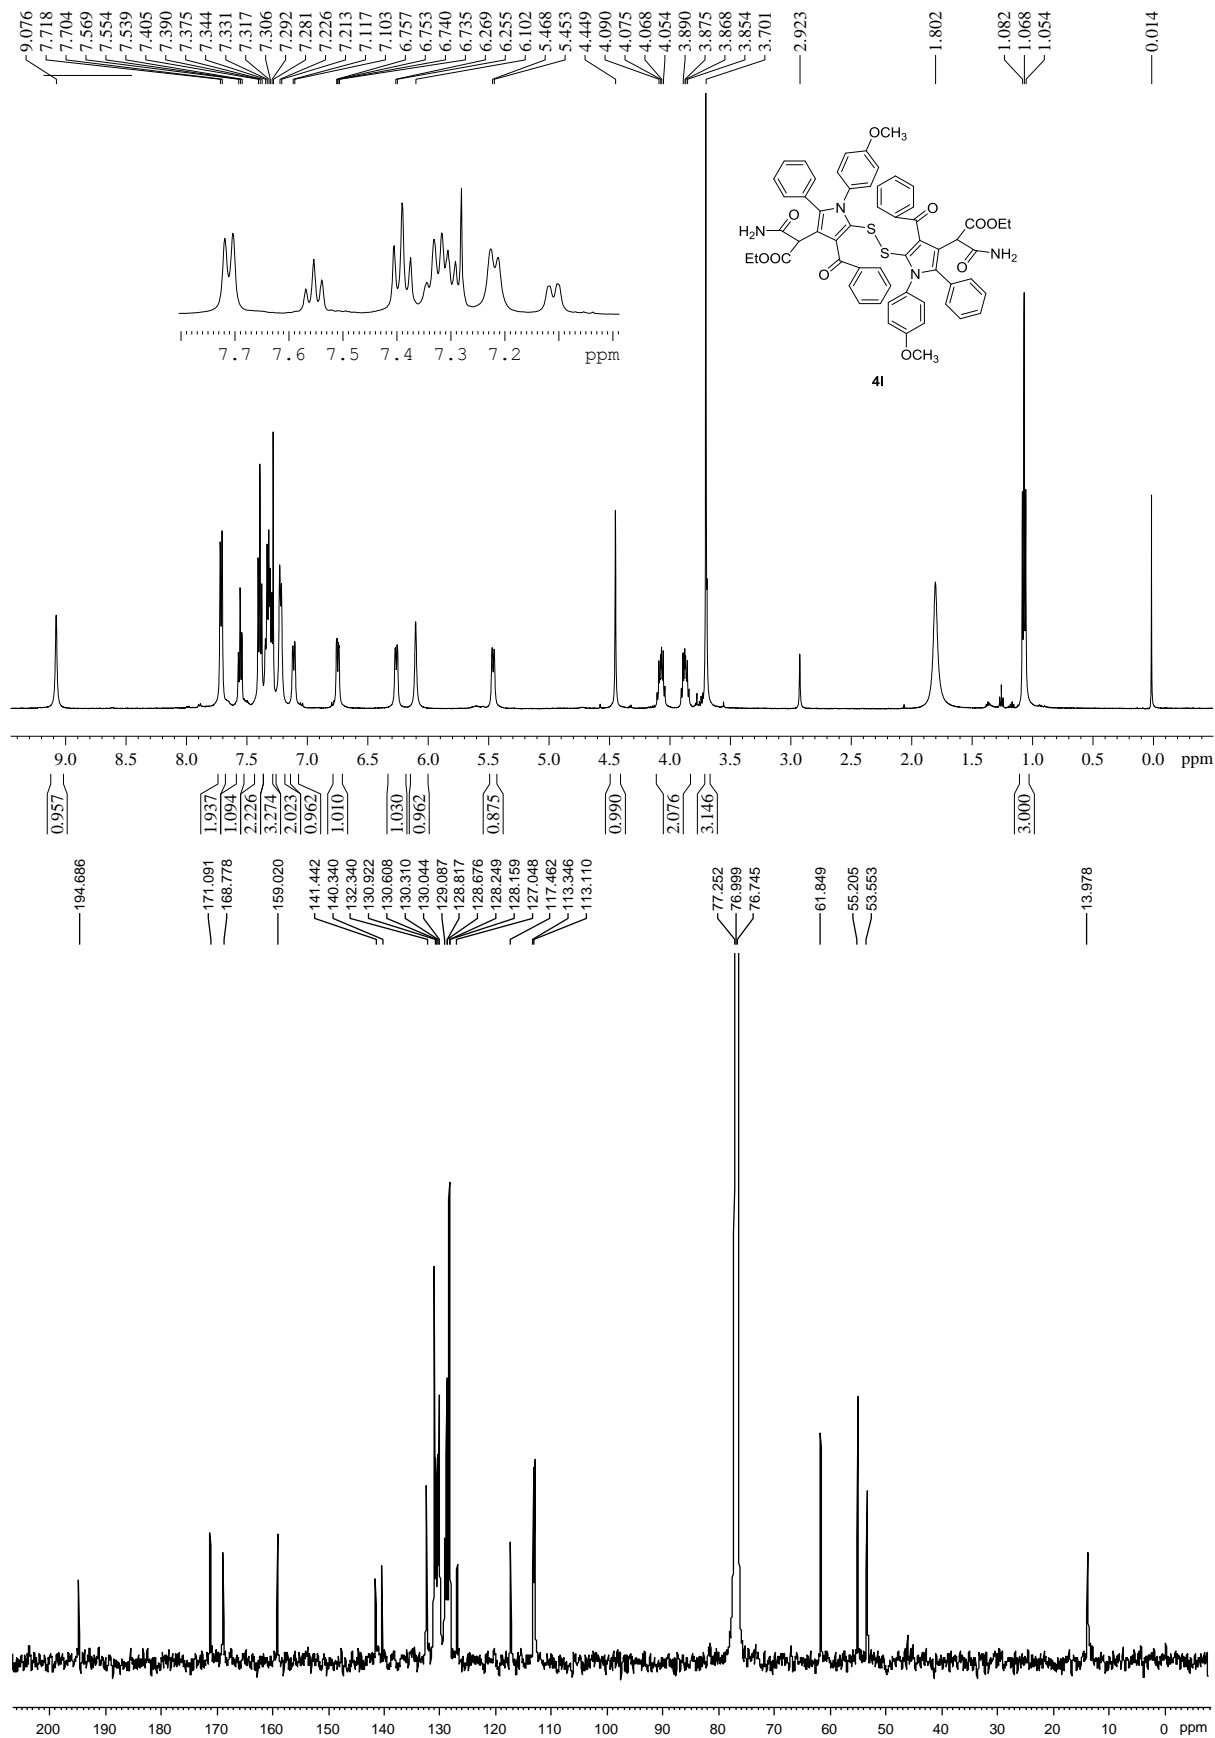

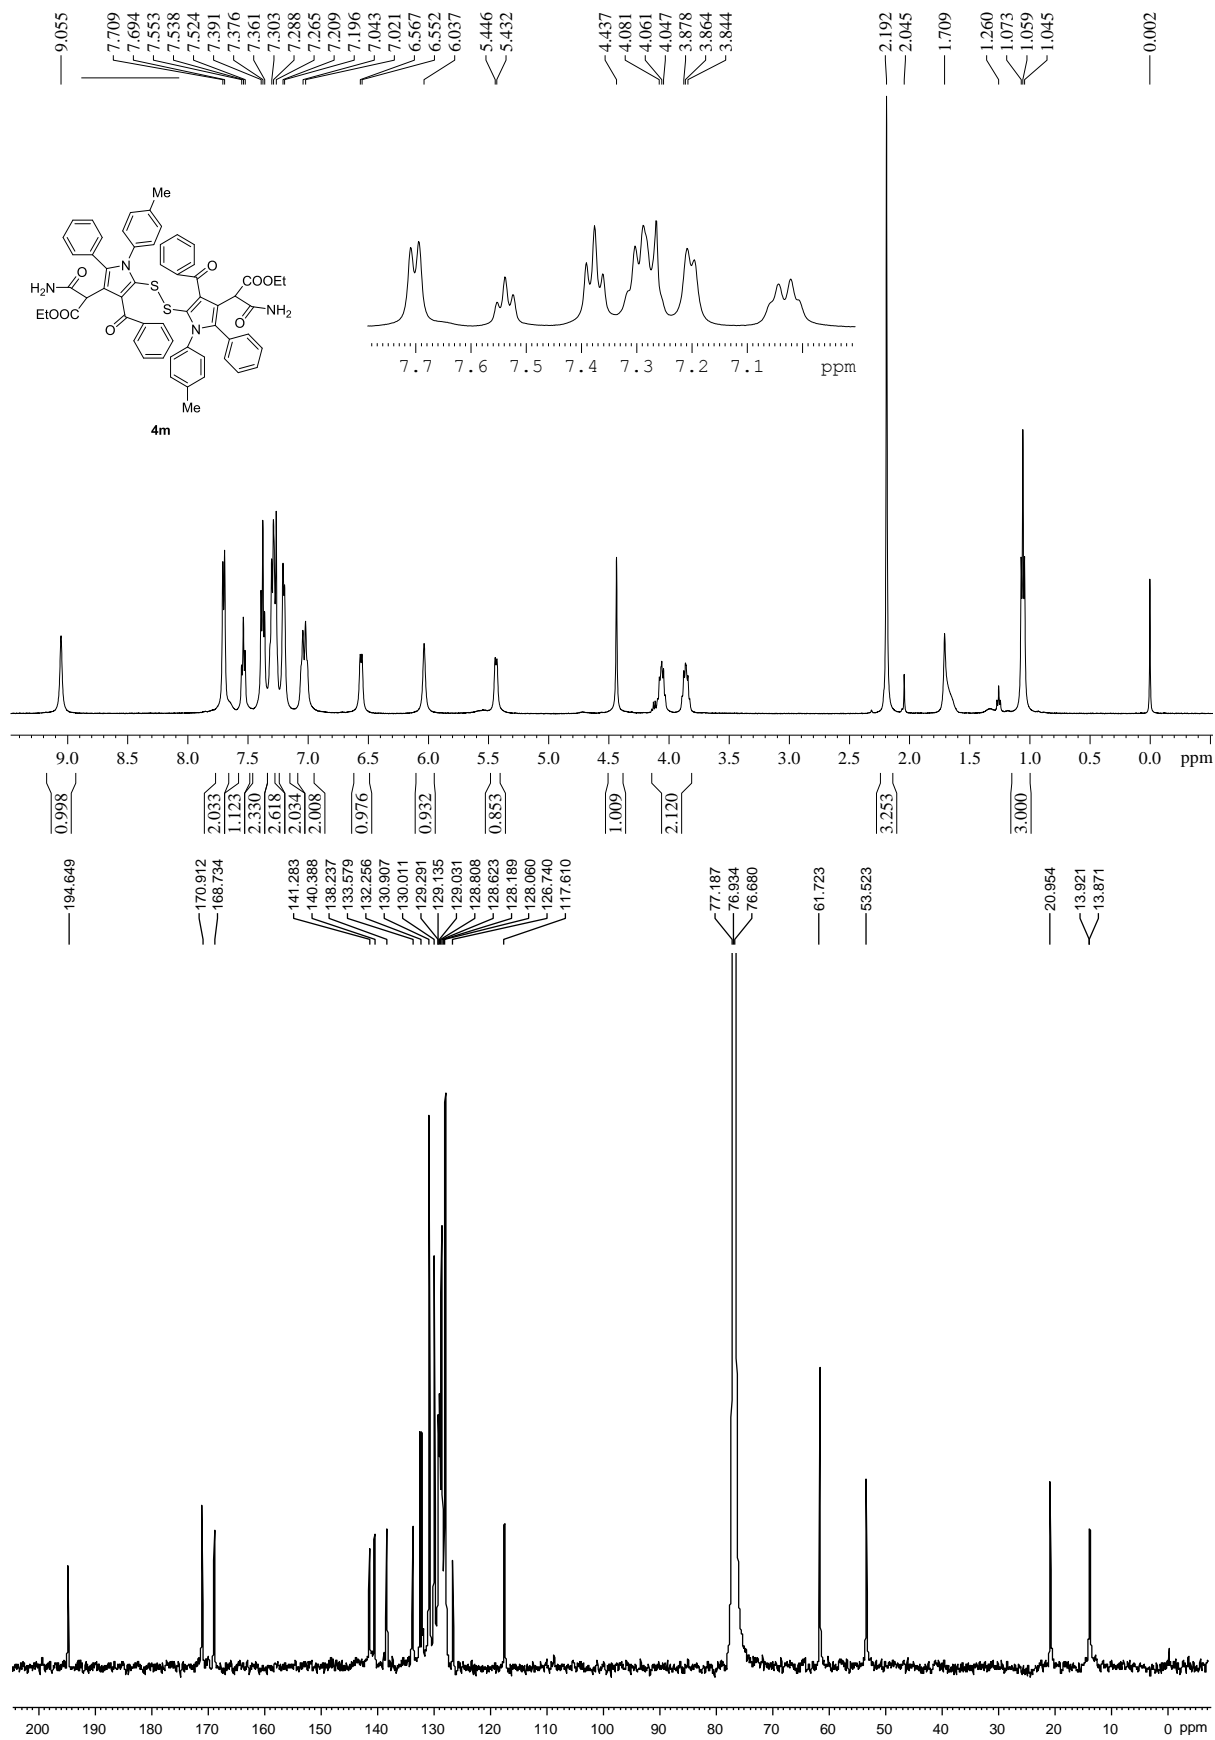

9.065  
8.999  
7.700  
7.688  
7.612  
7.541  
7.405  
7.391  
7.353  
7.340  
7.326  
7.264  
7.200  
7.133  
7.117  
6.702  
6.057  
5.695  
5.457  
4.442  
4.060  
3.867  
1.699  
1.062  
0.000

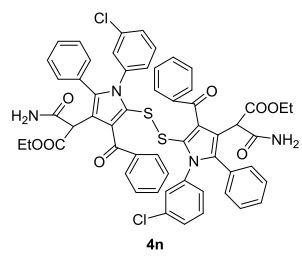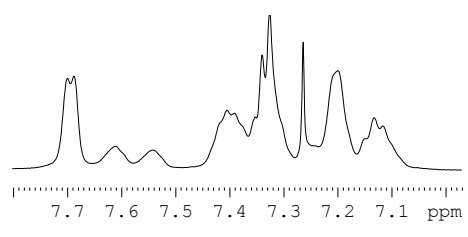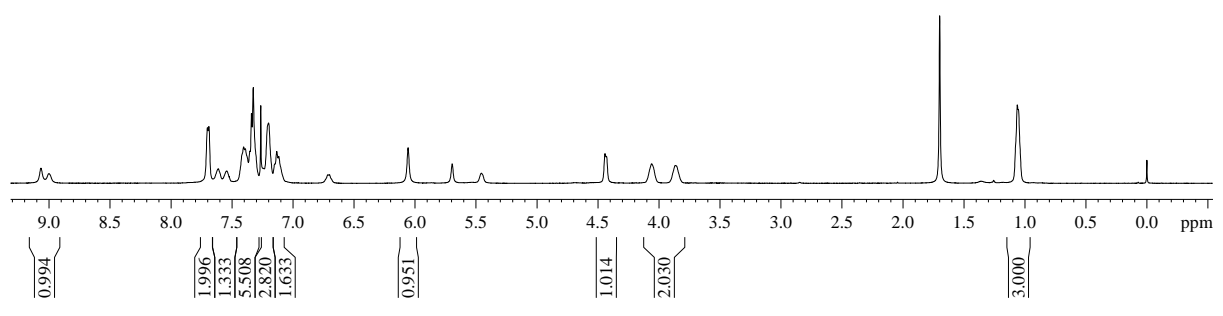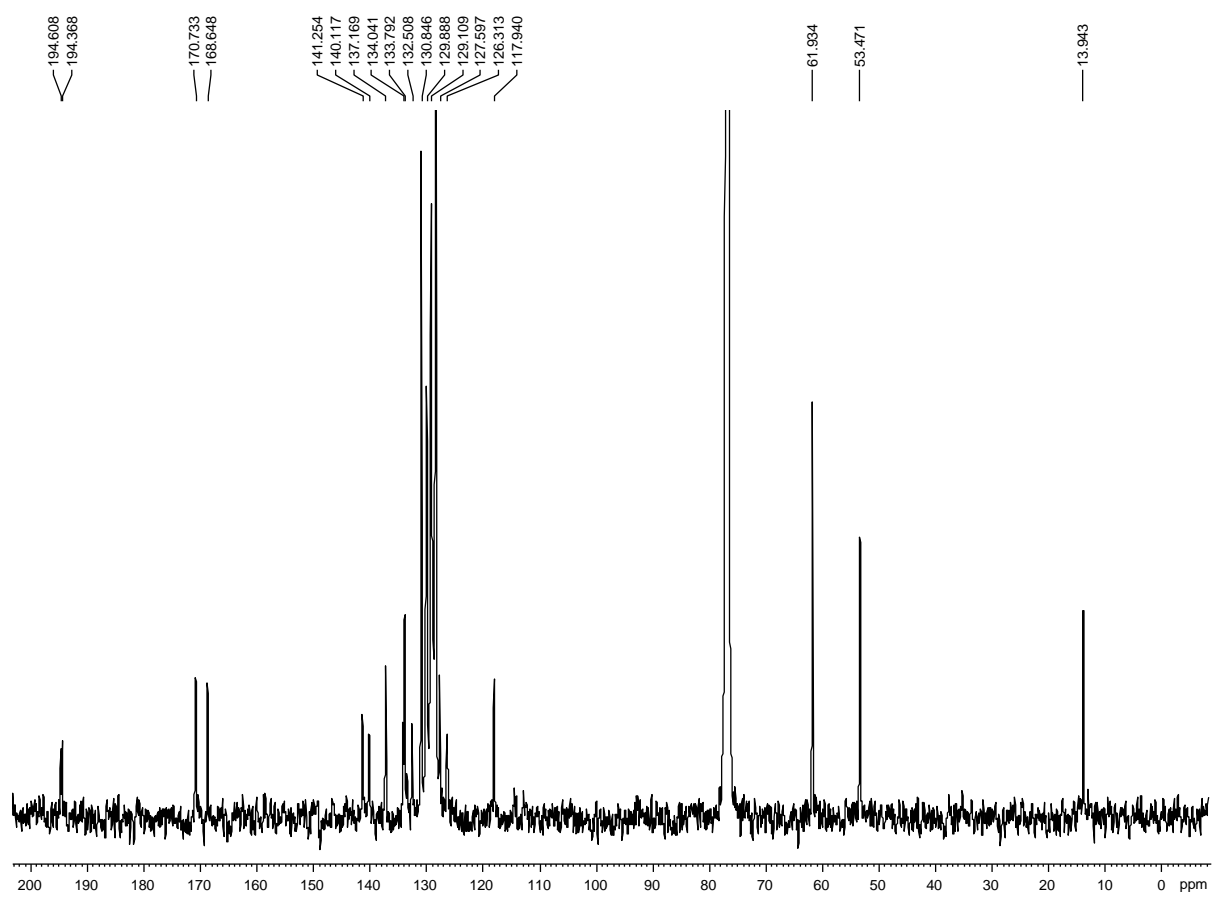

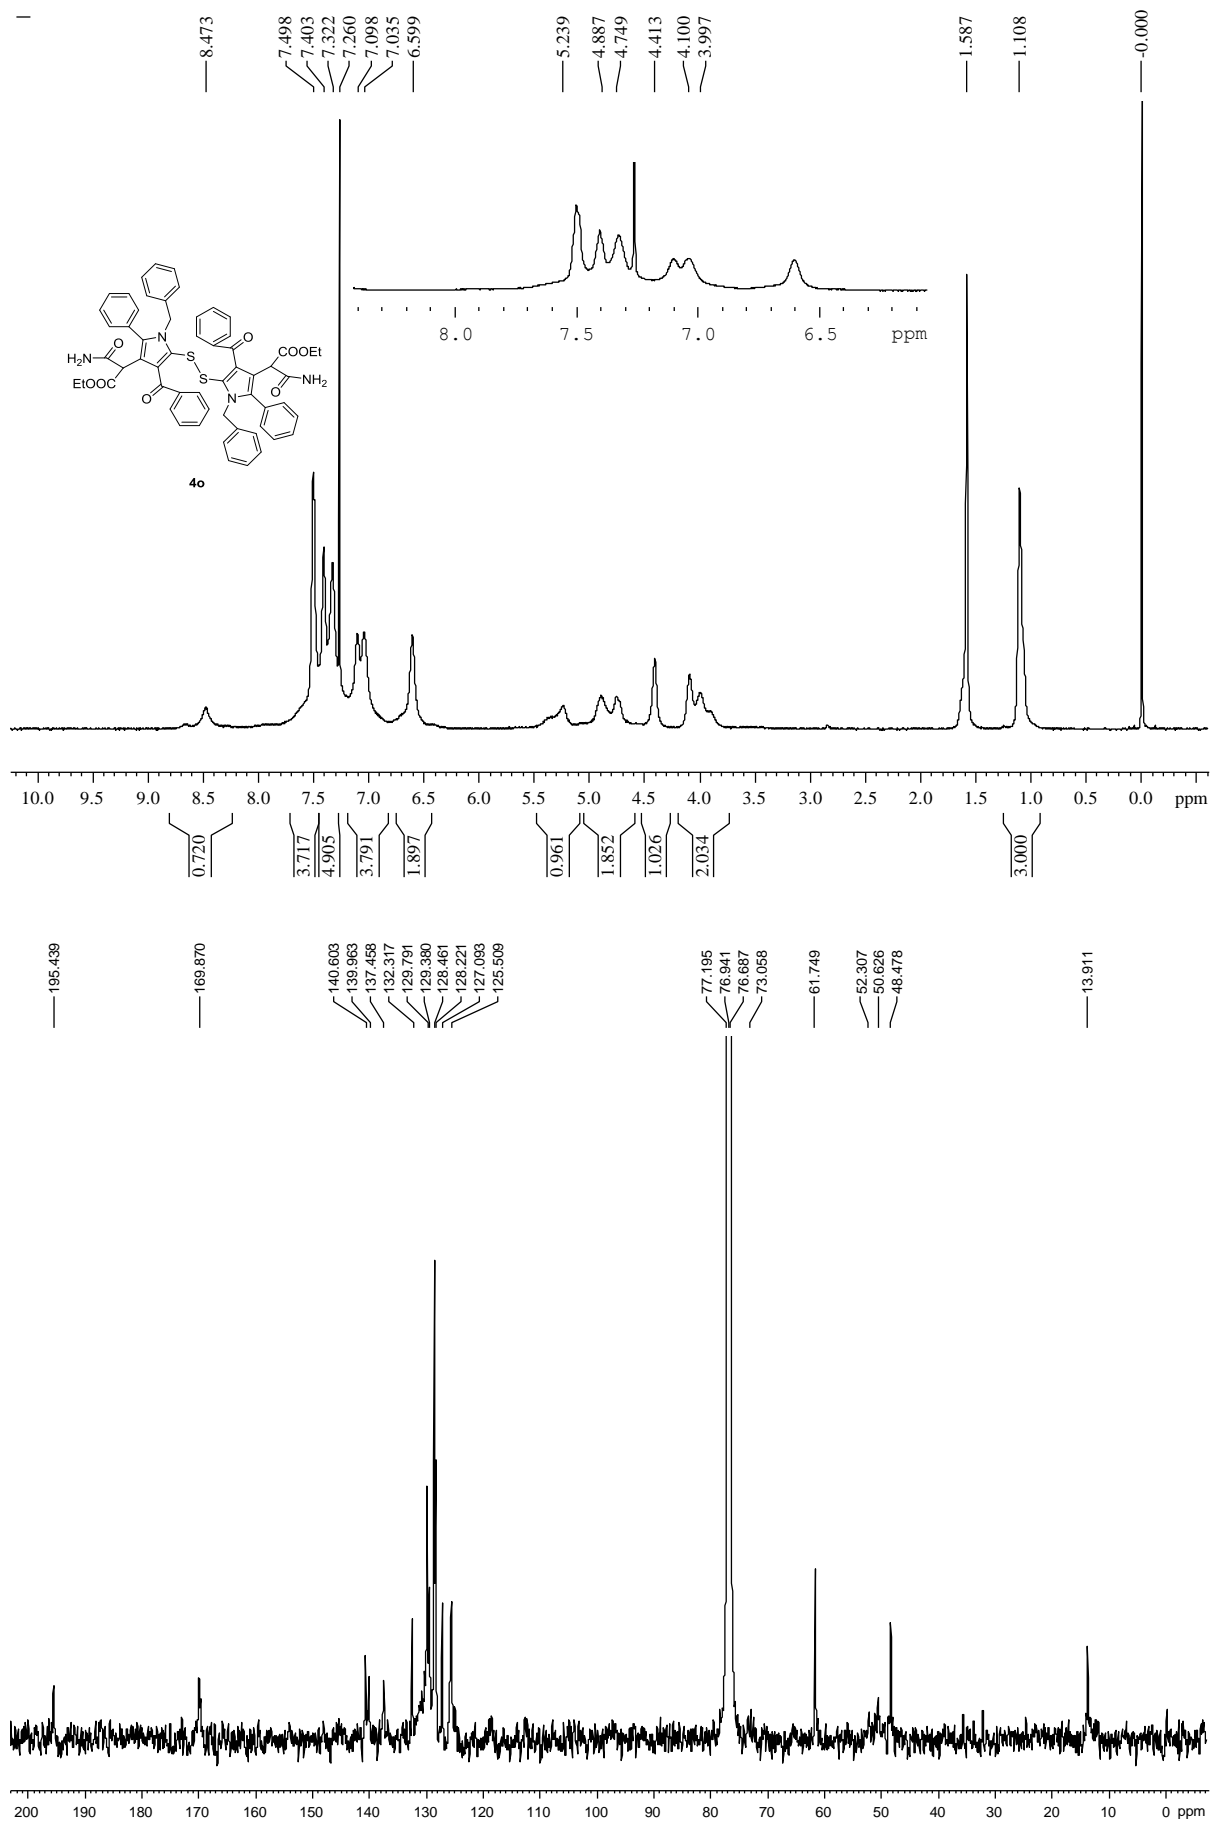

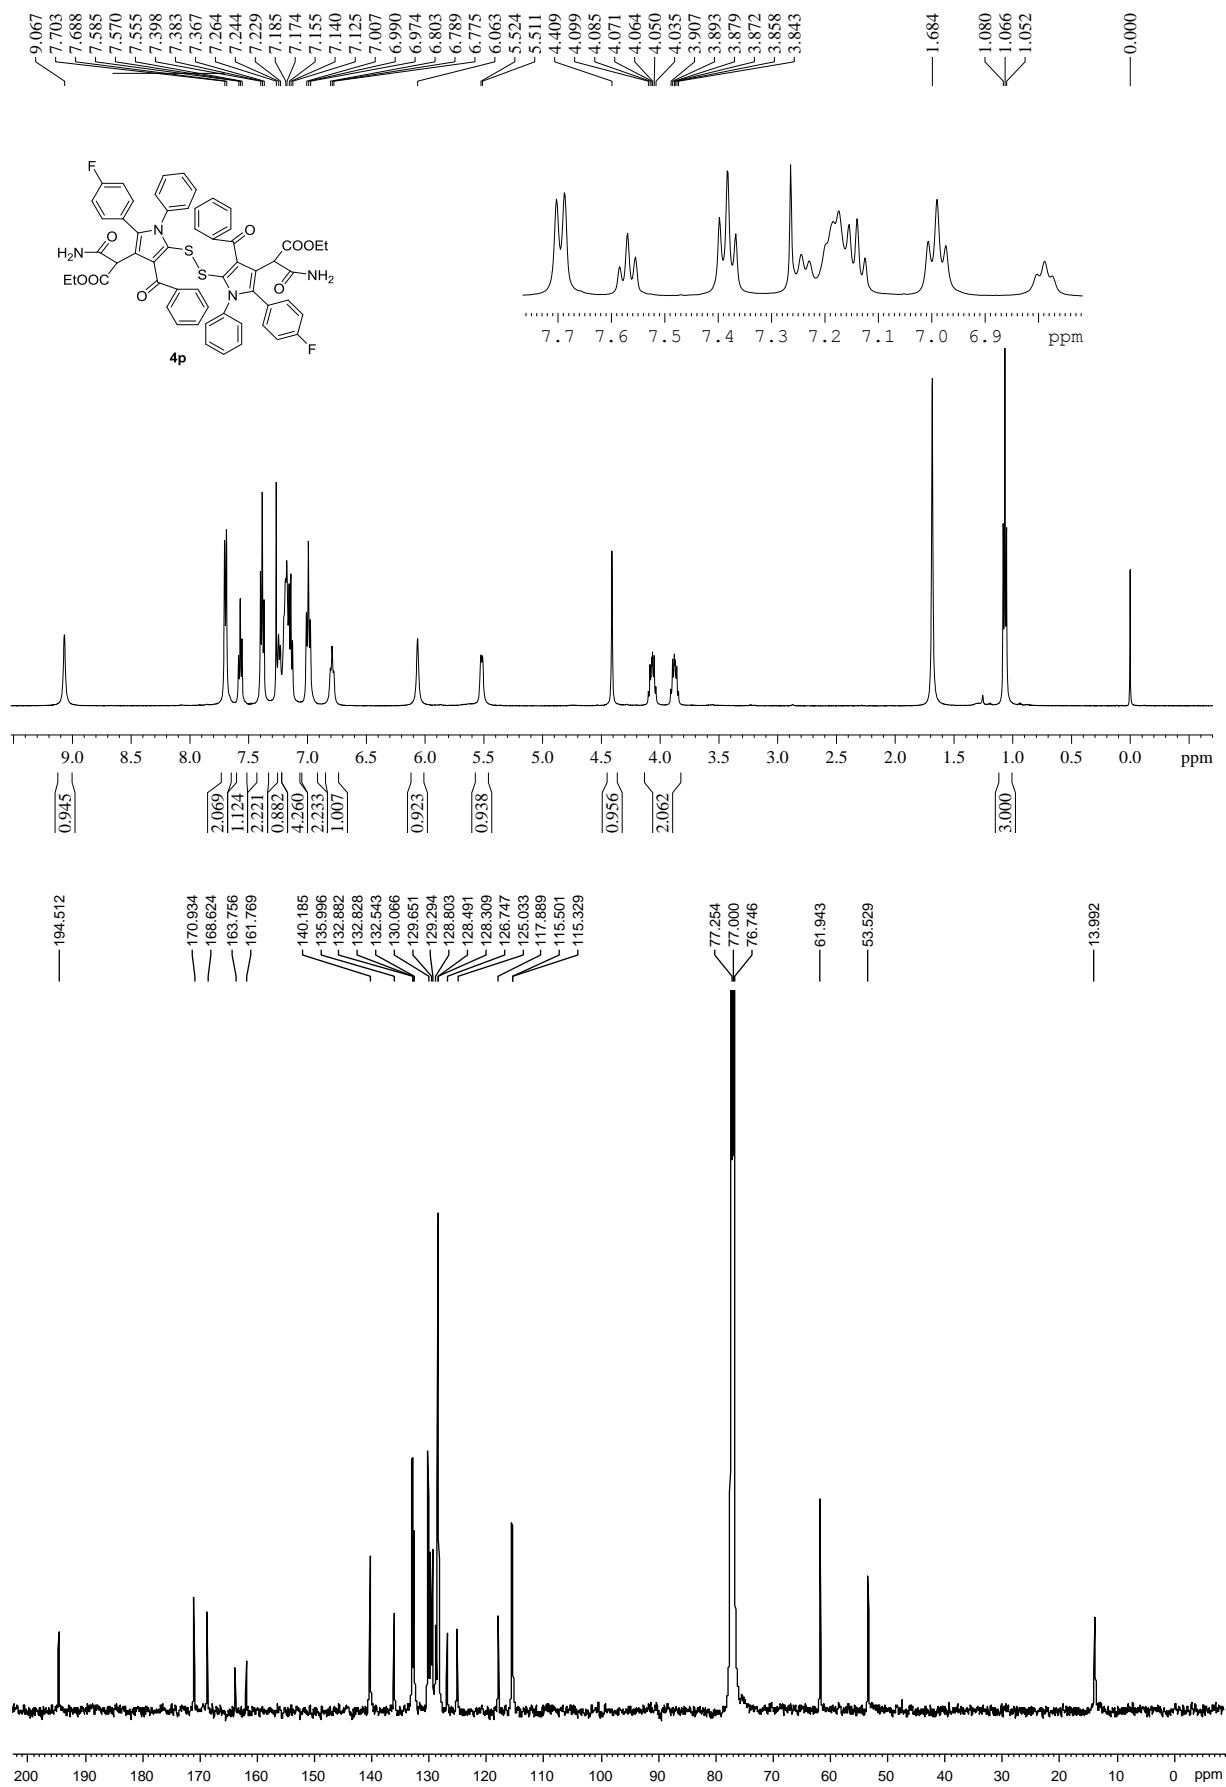

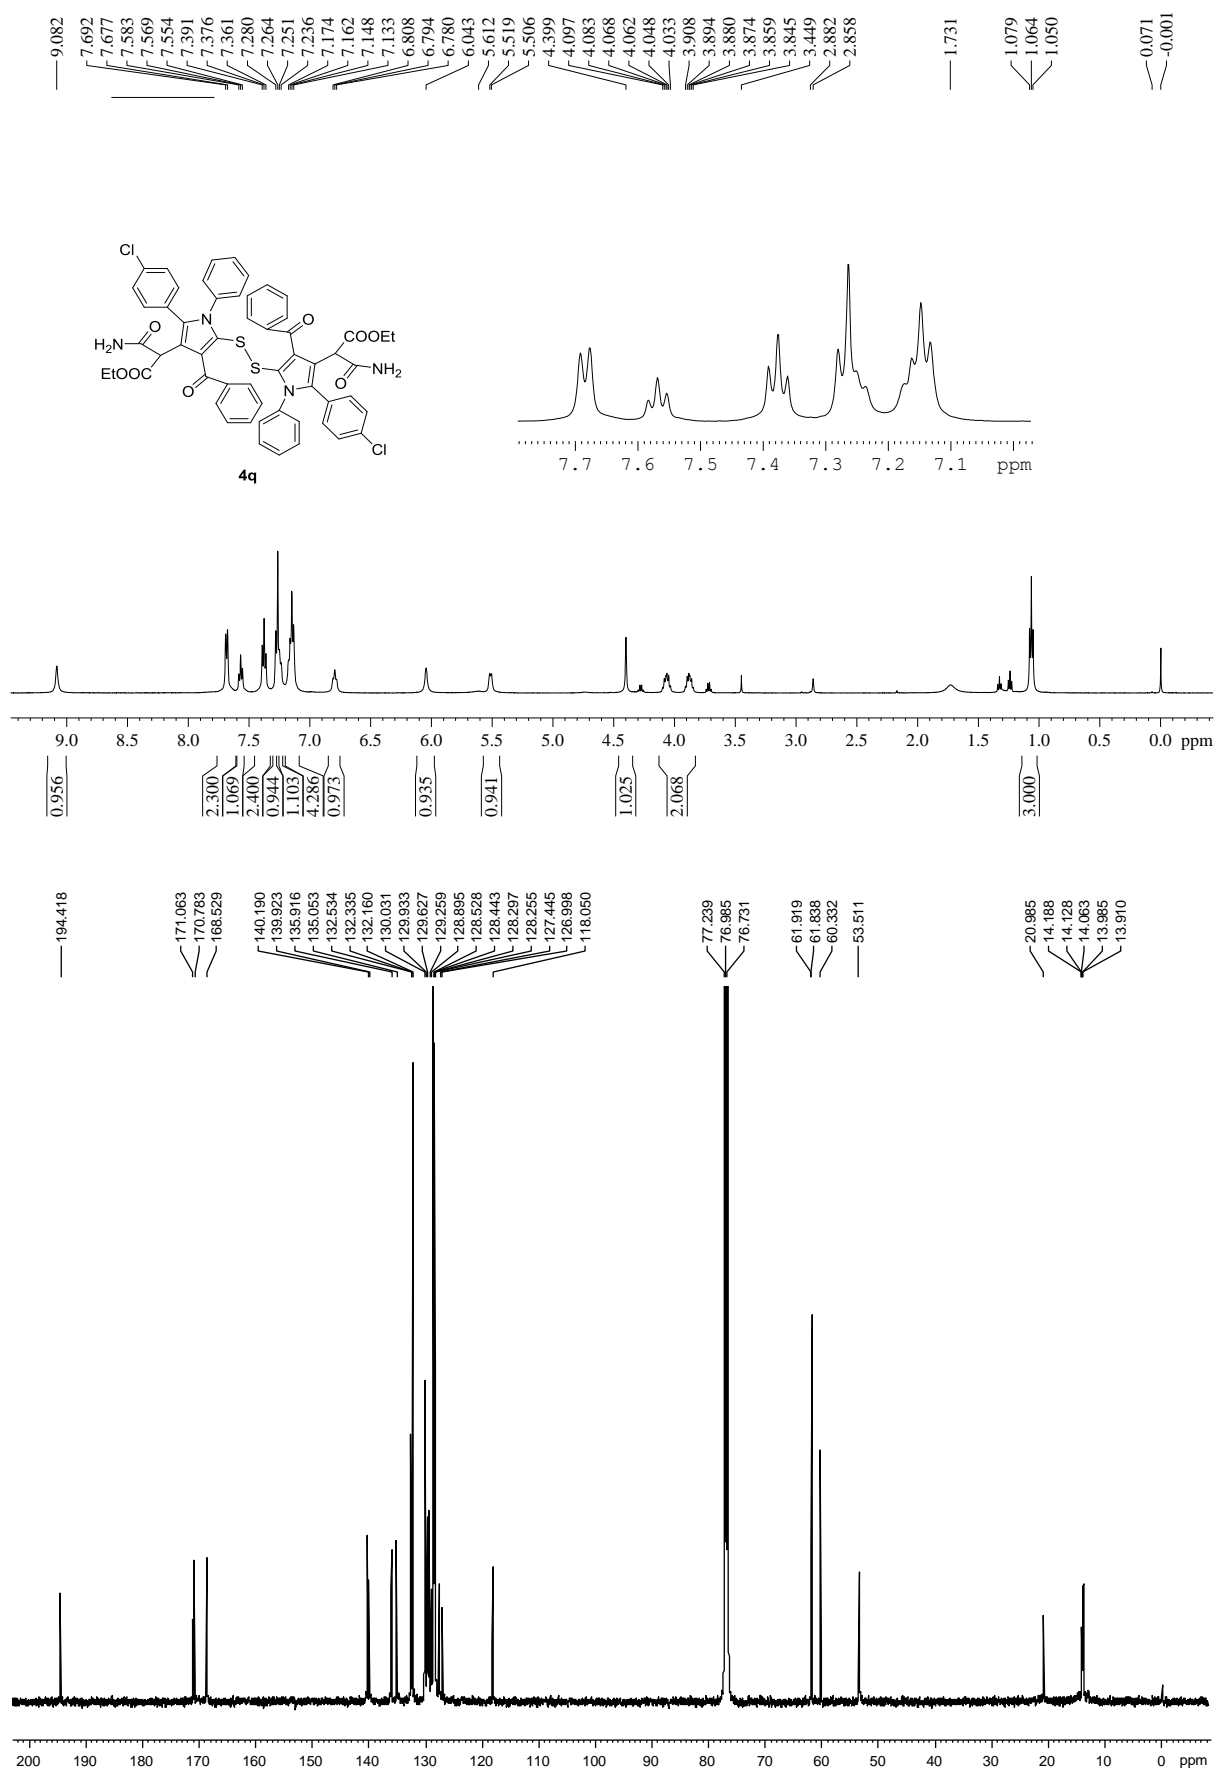



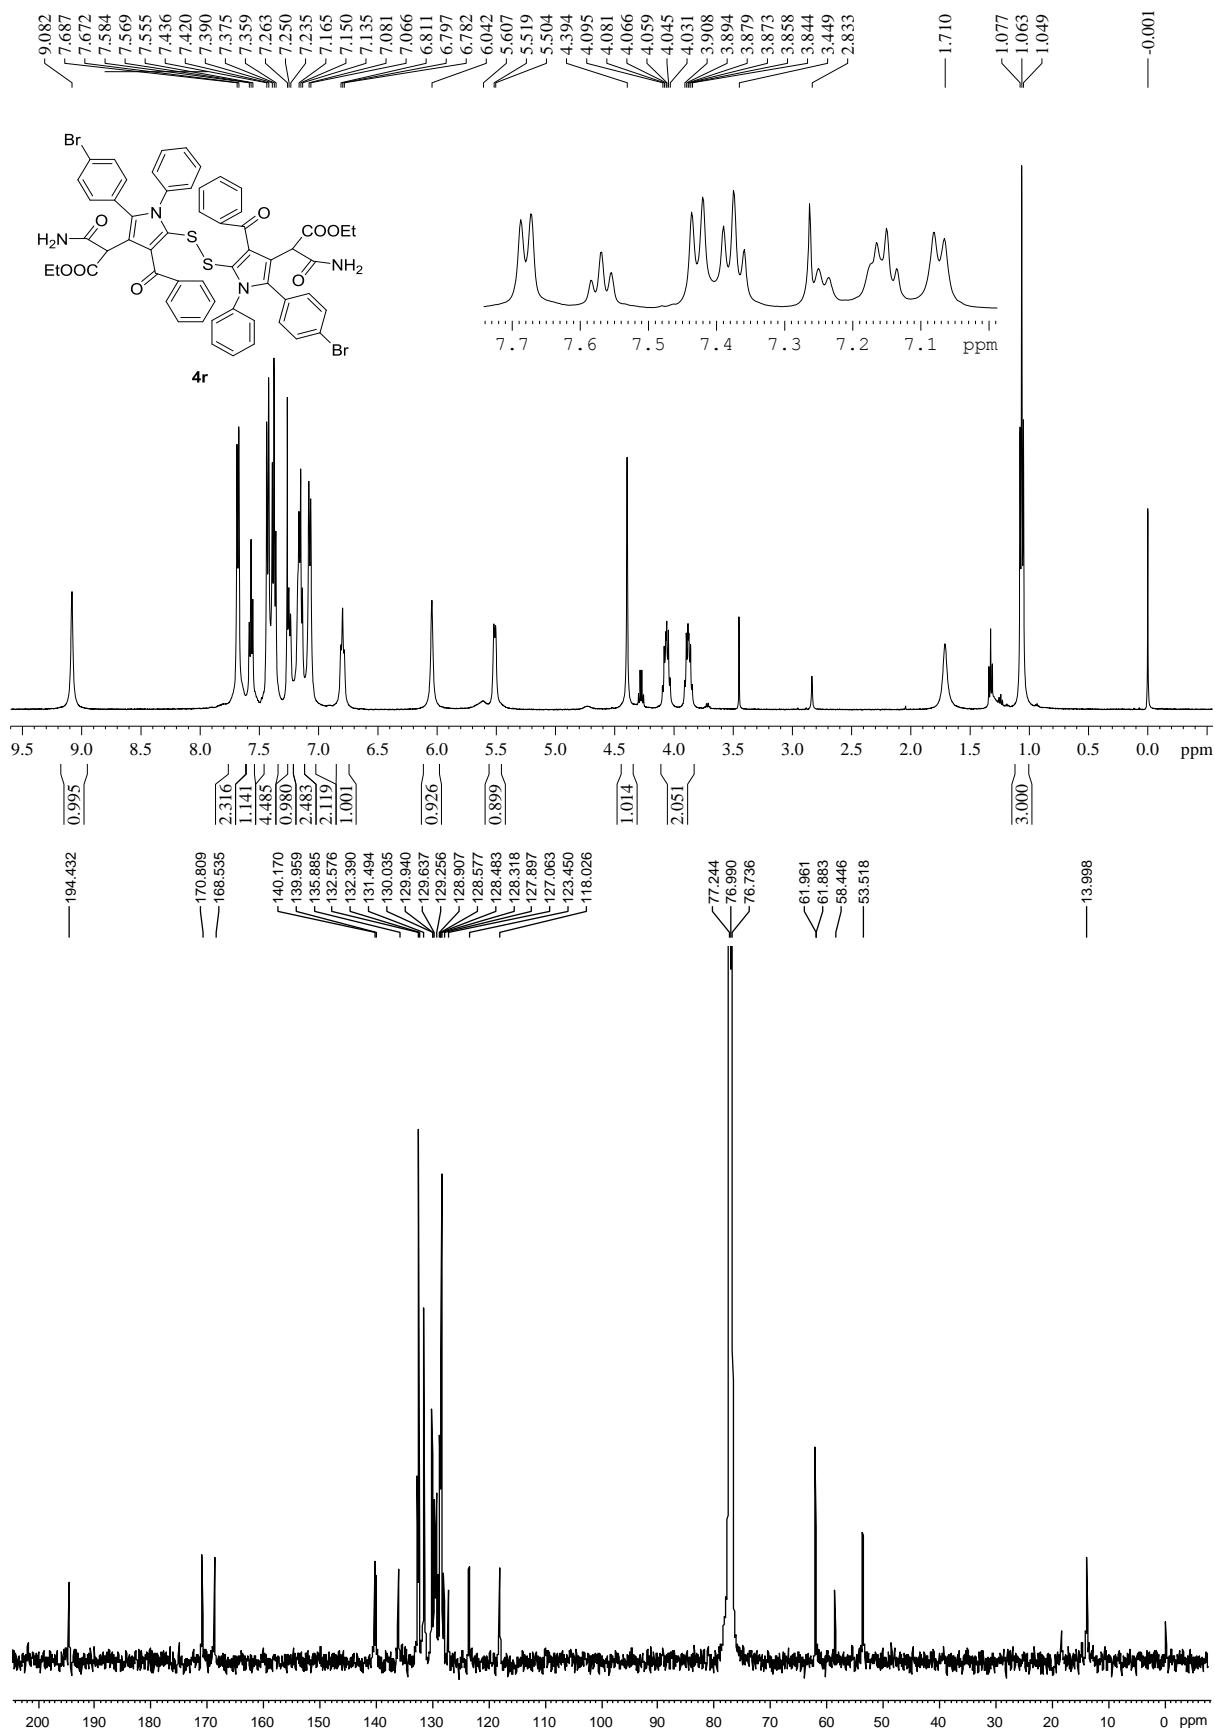

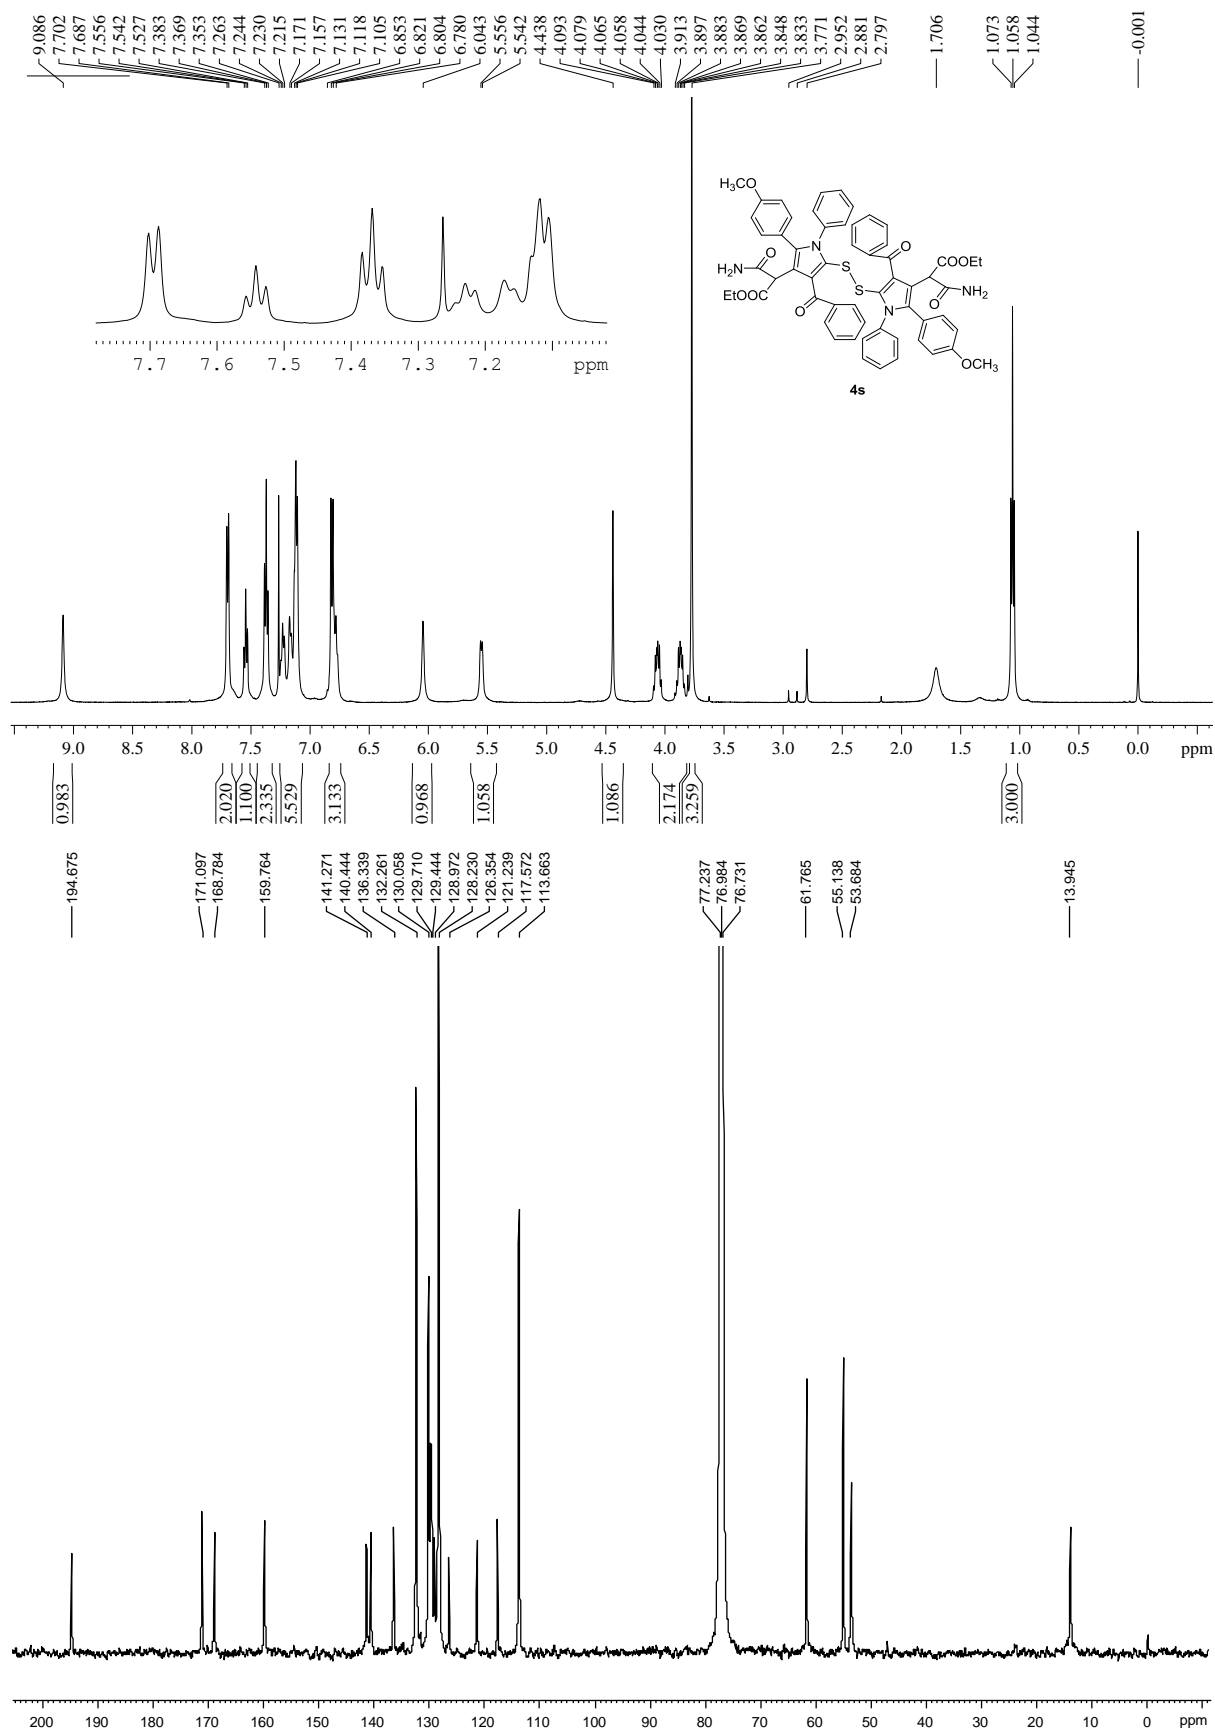

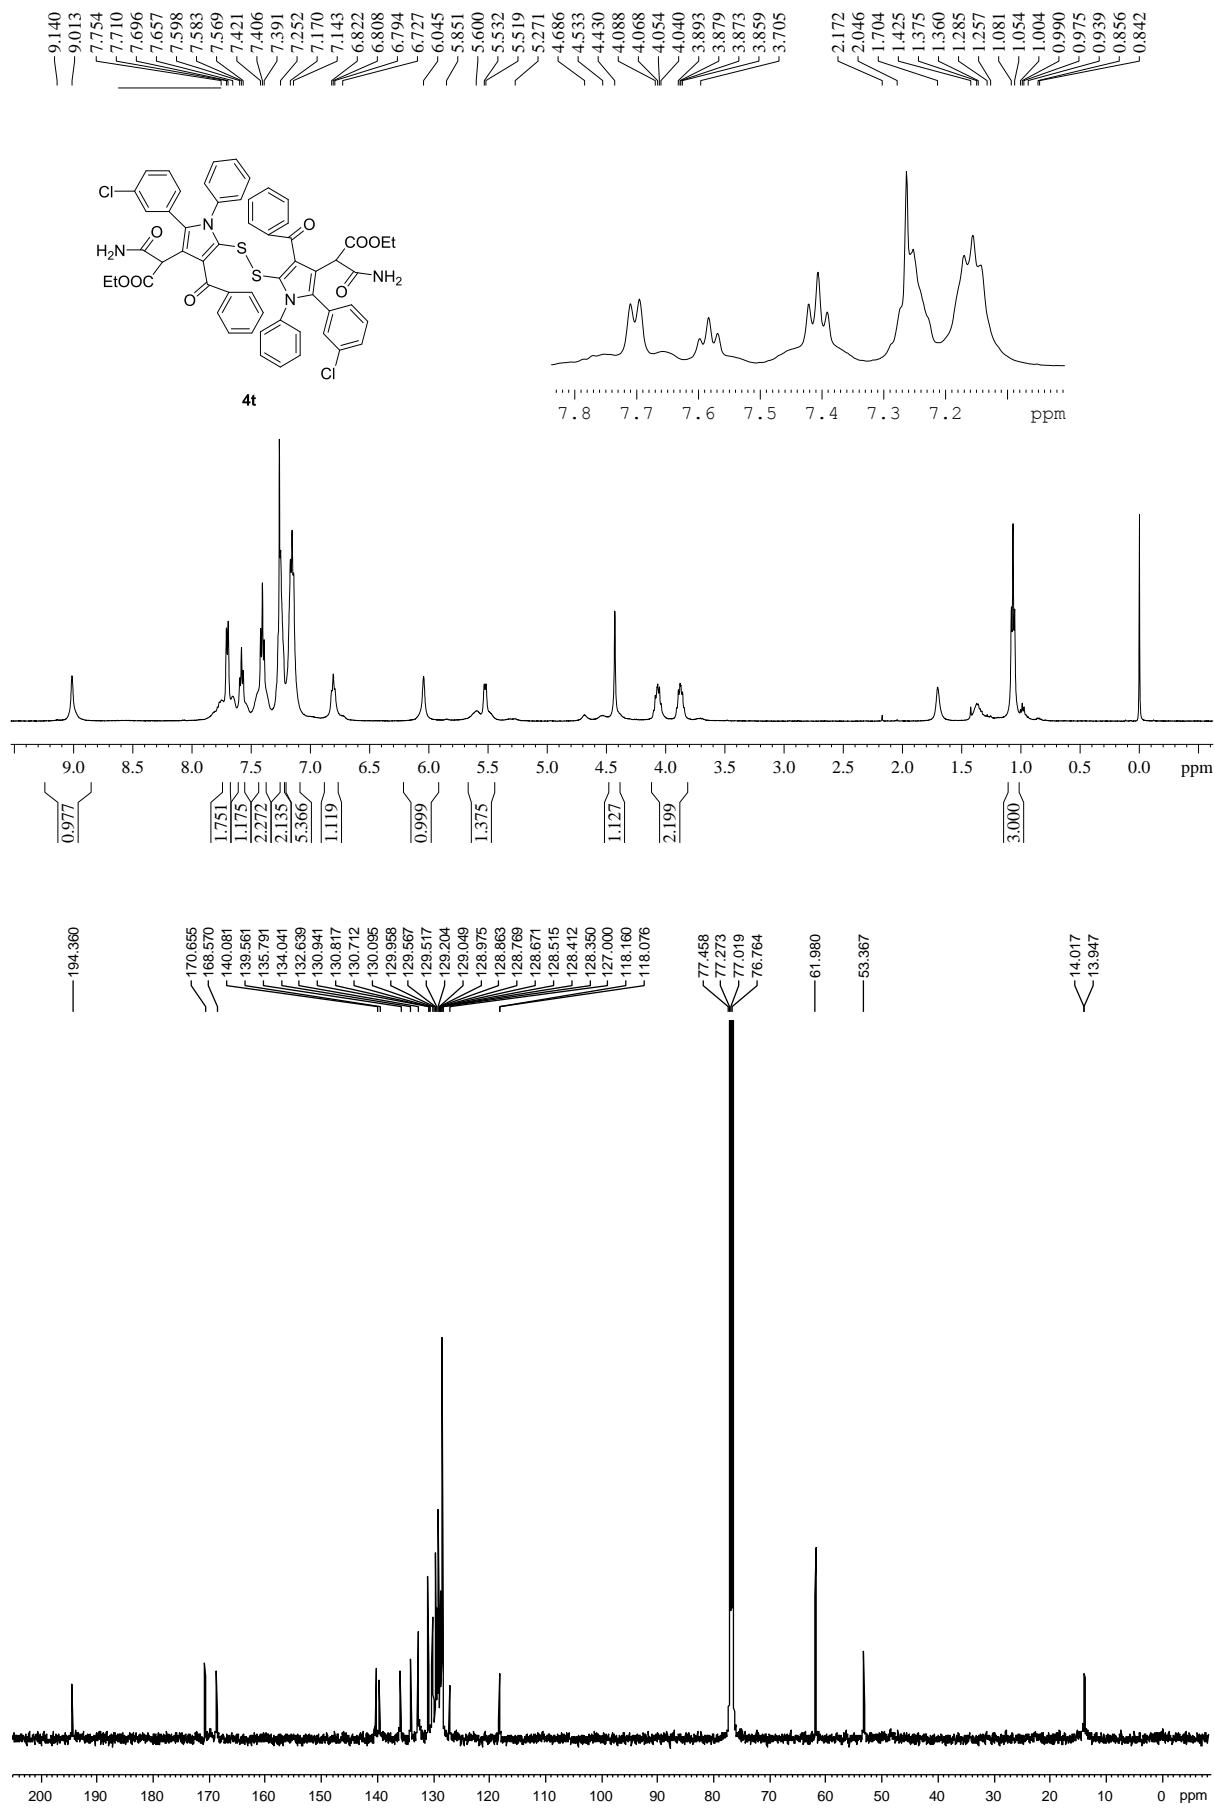

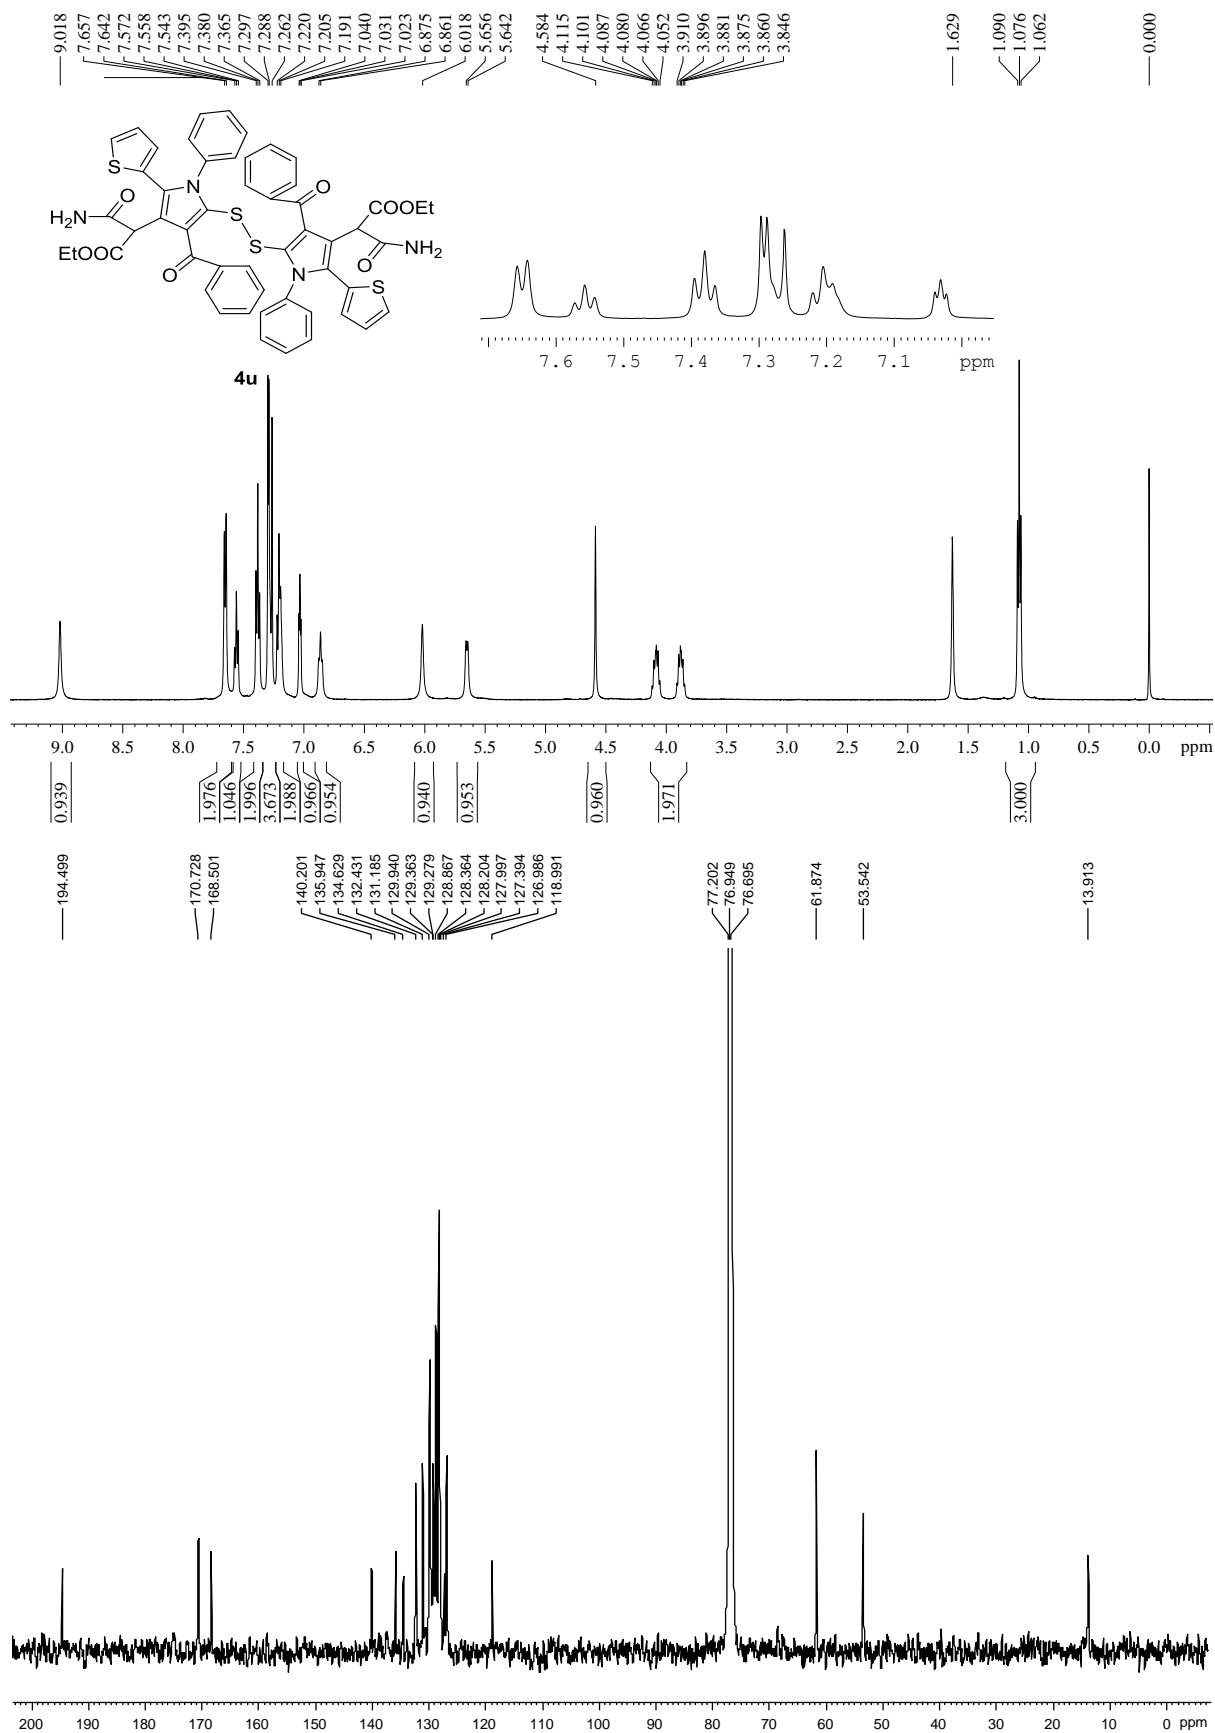

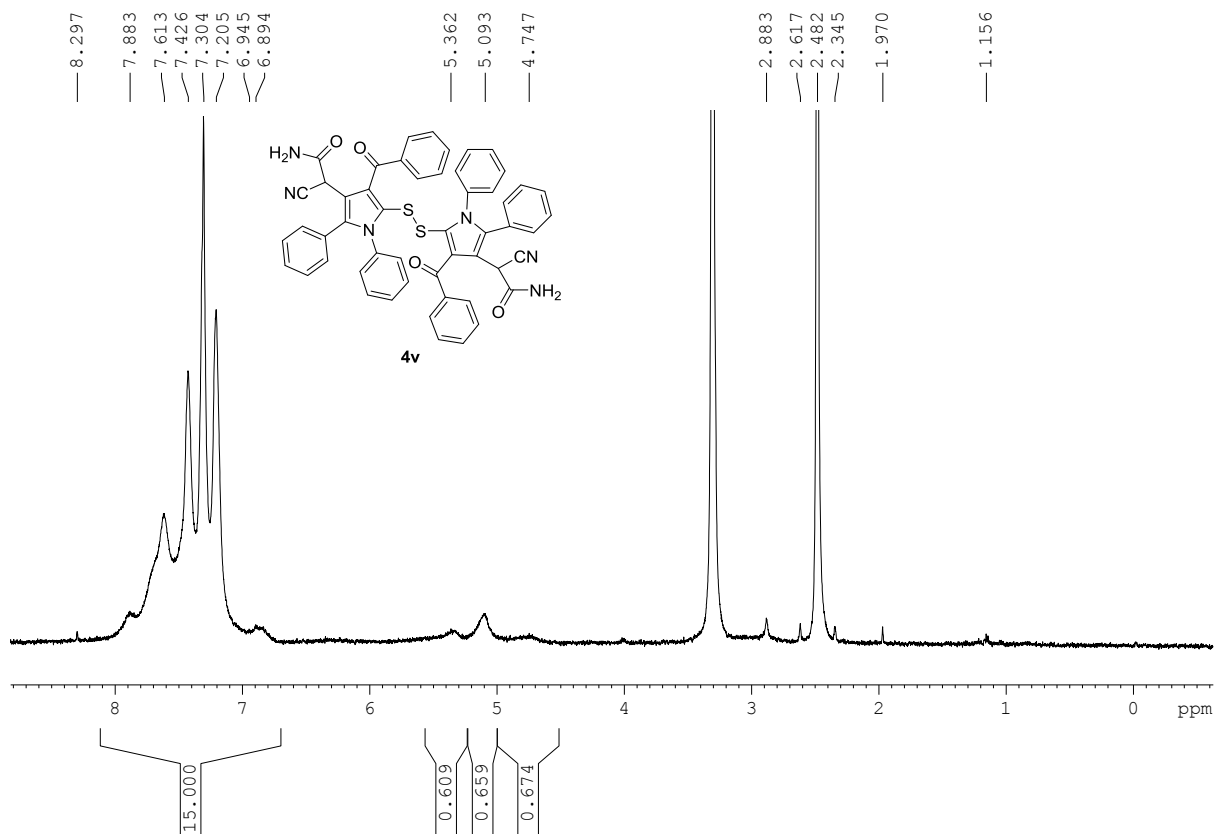

**4v (exchanged with D<sub>2</sub>O)**

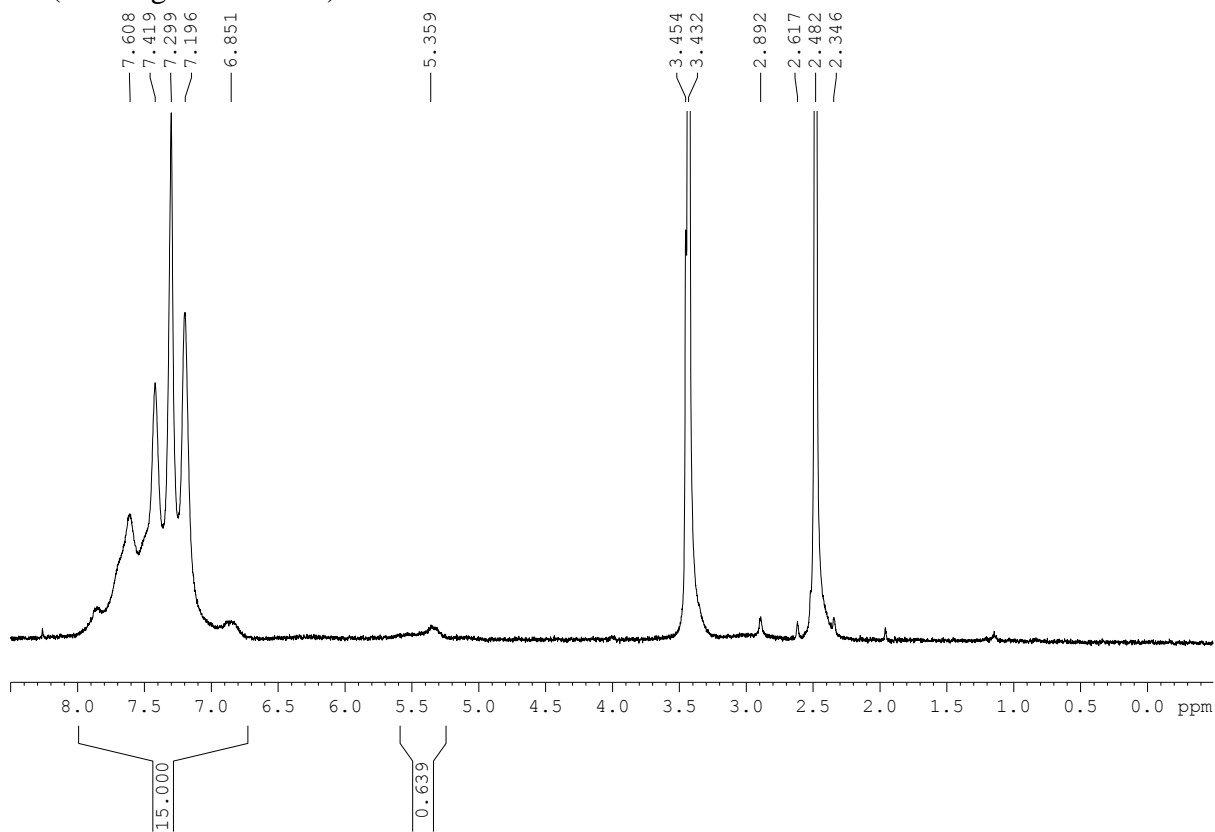

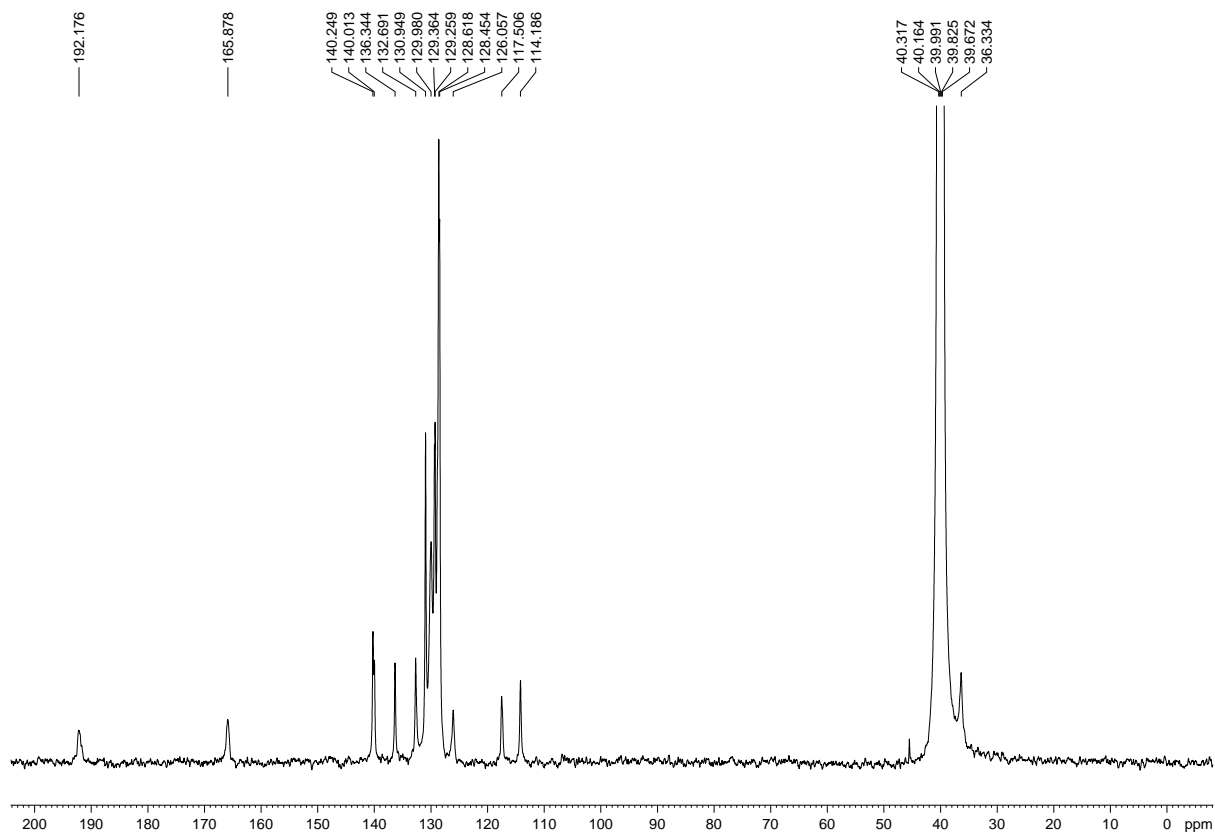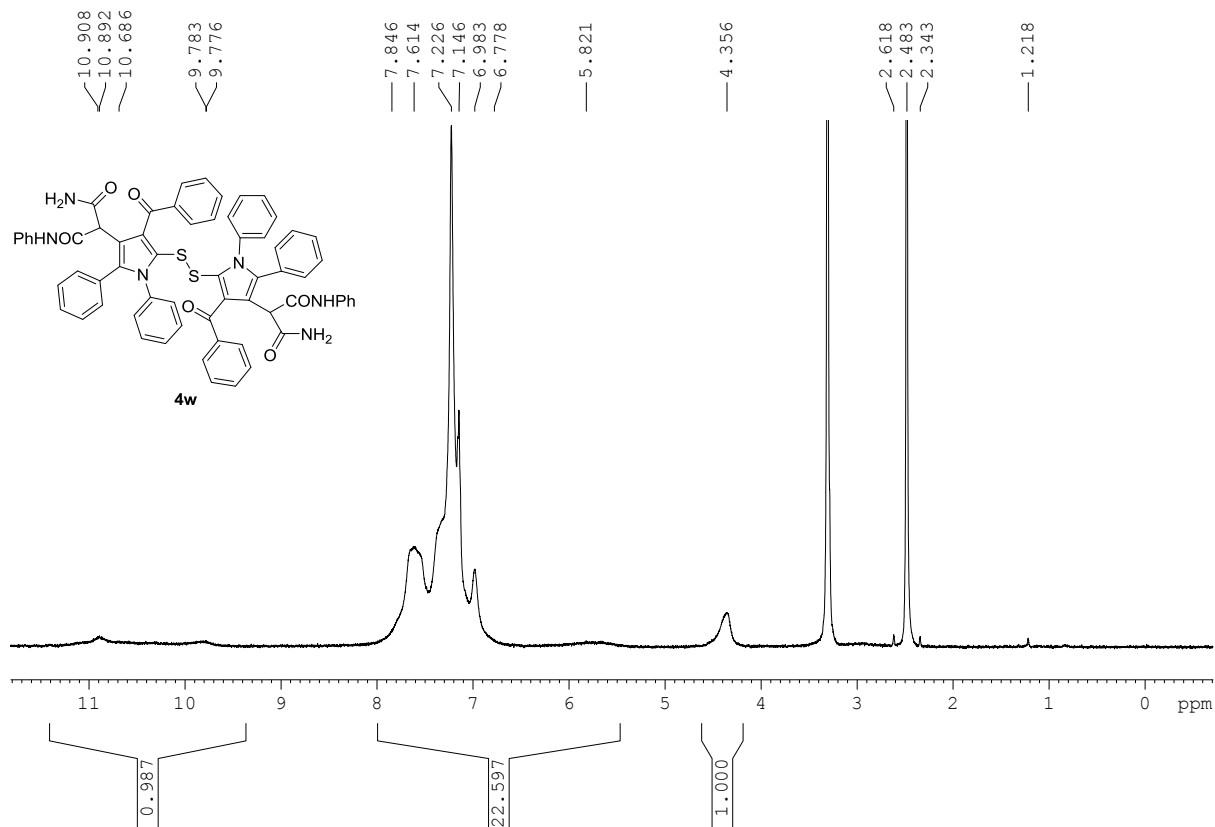

**4w (exchanged with D<sub>2</sub>O)**

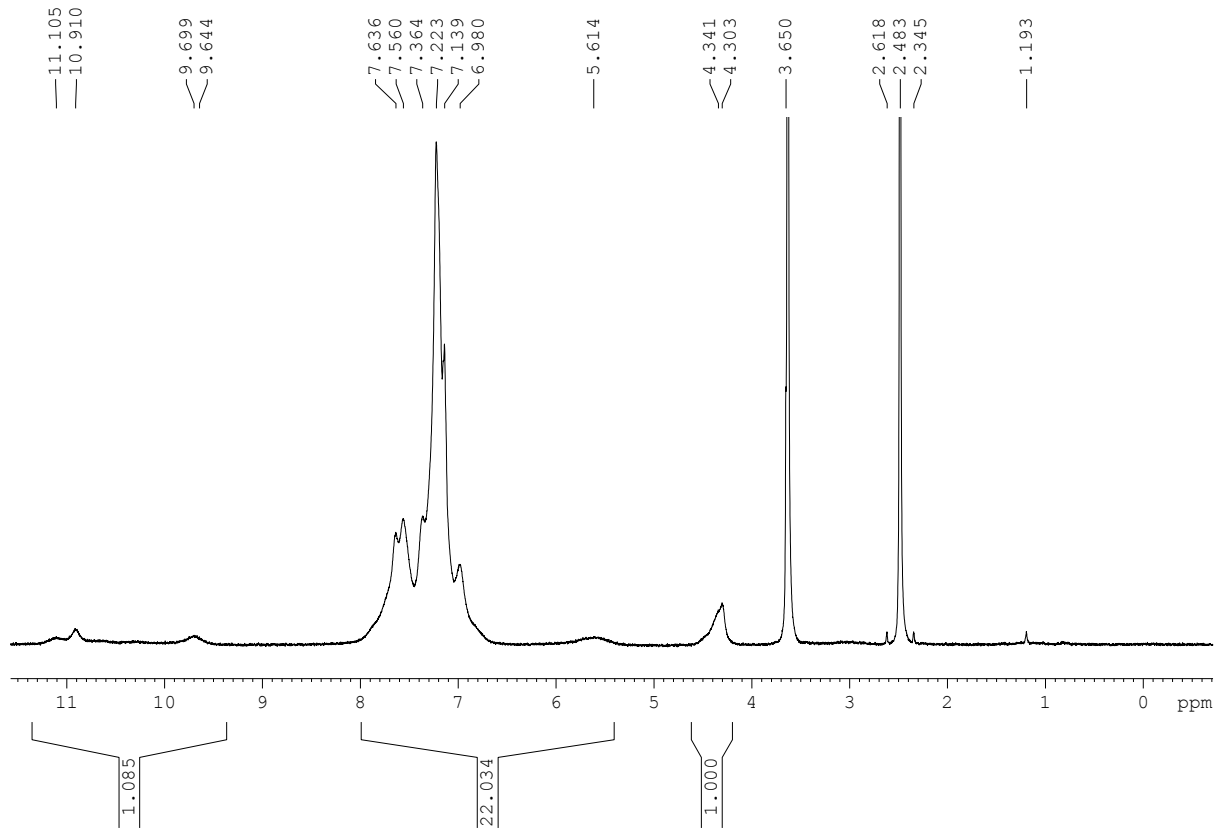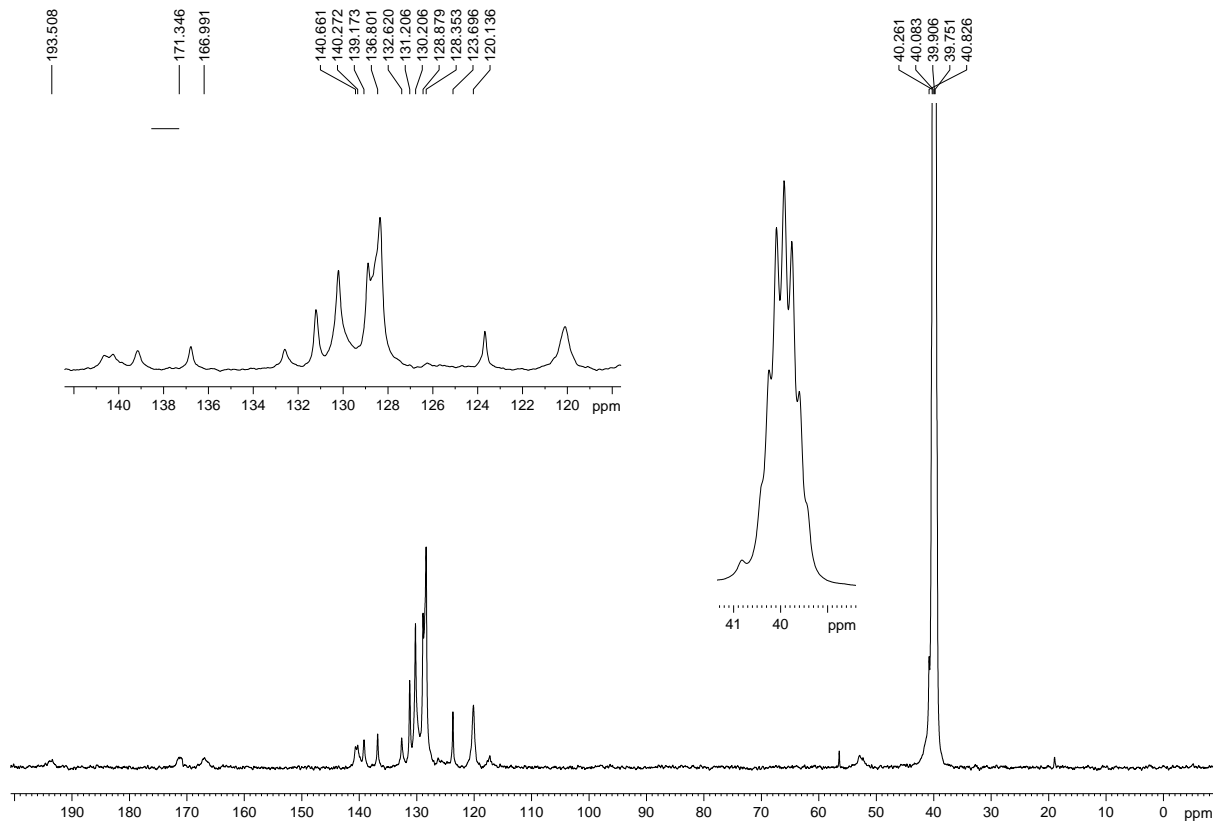

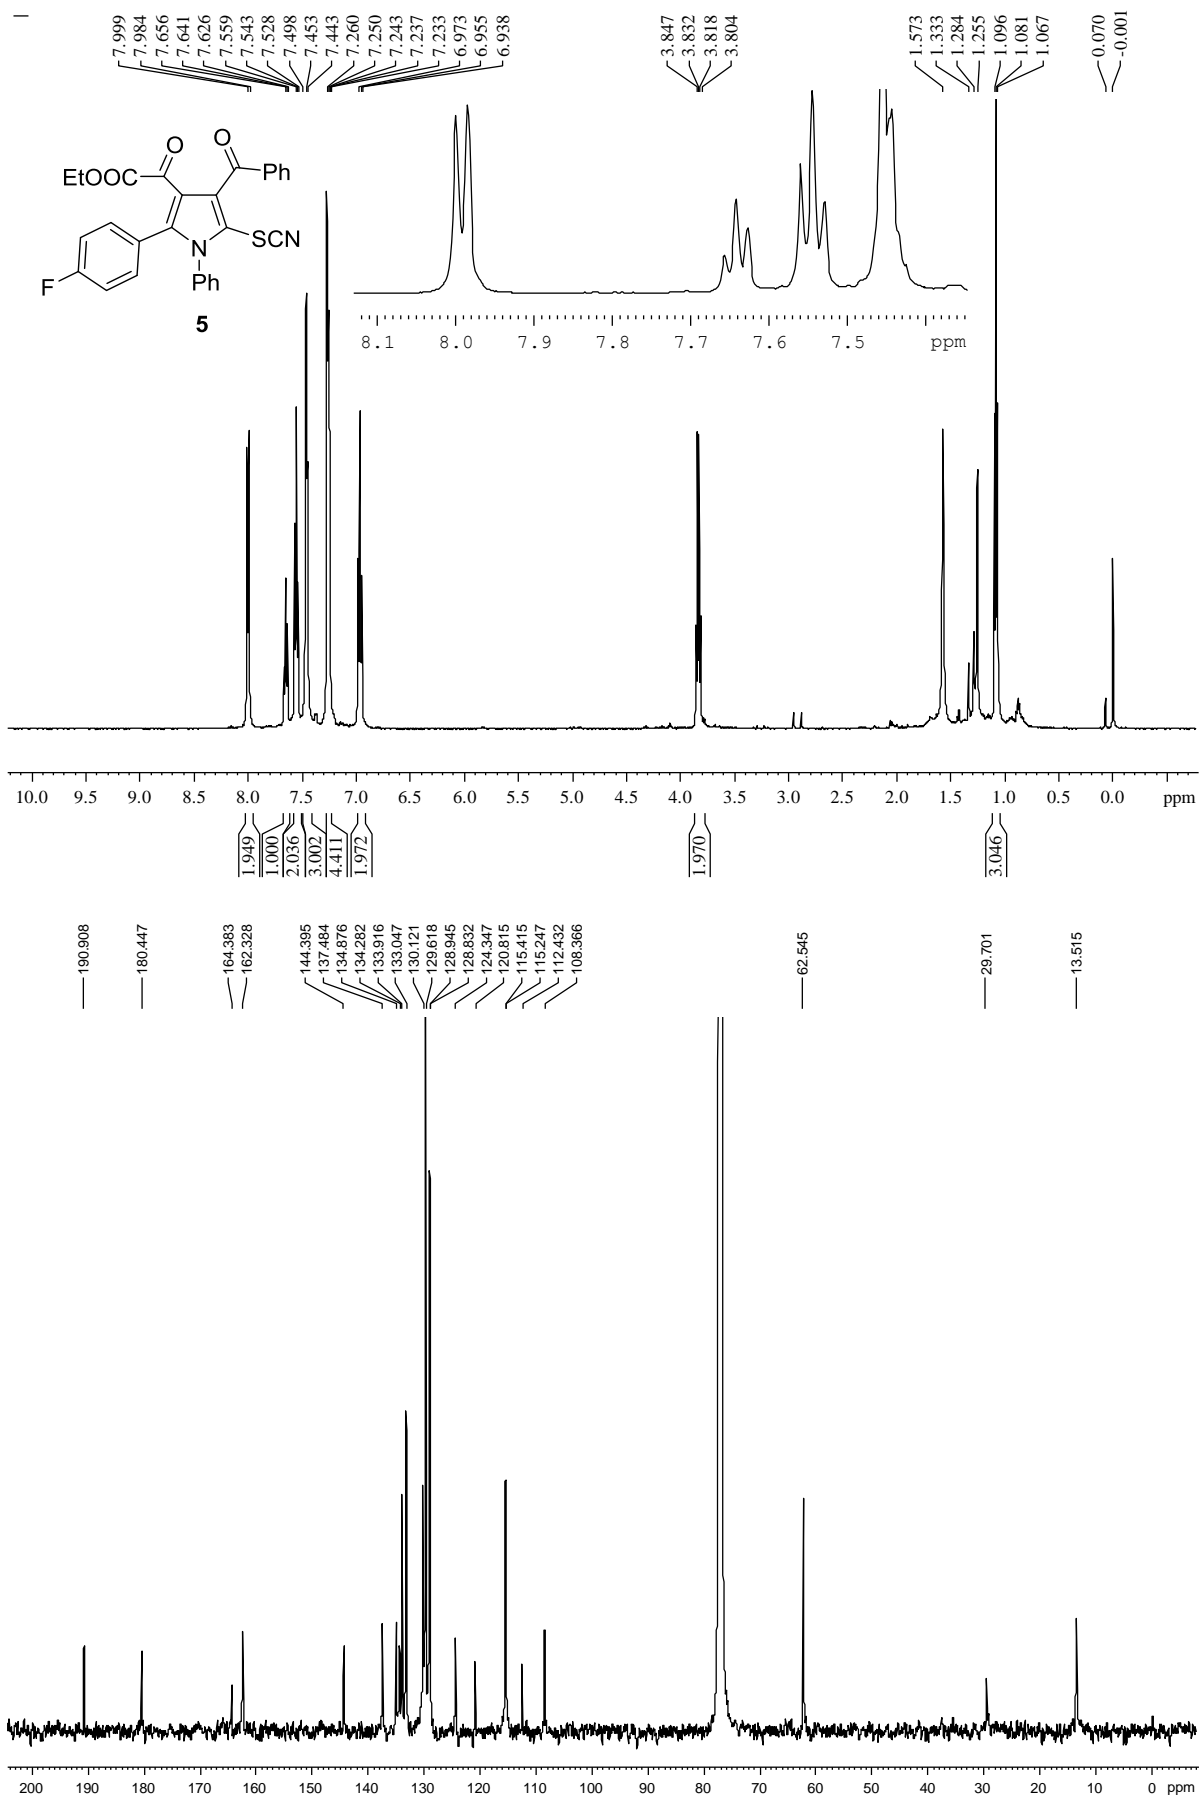



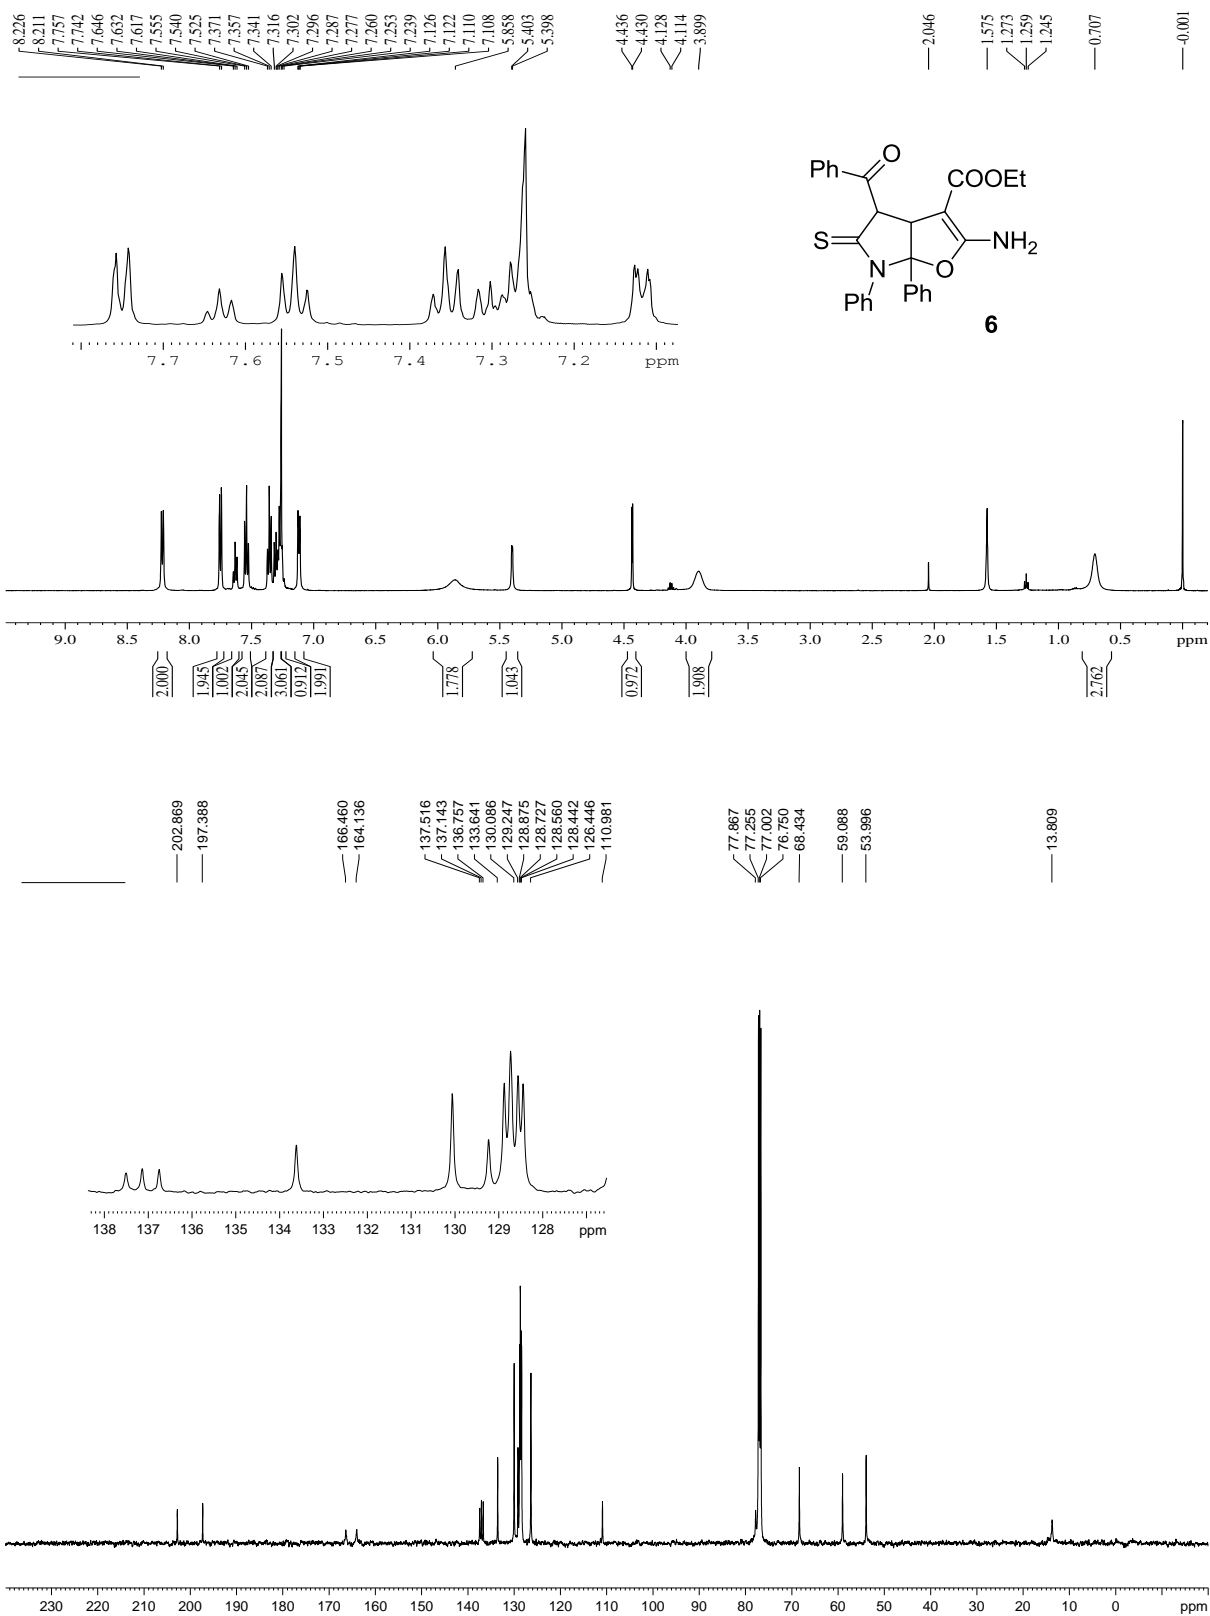

Supplement: c7ob00655a1.pdf [file c7ob00655a1.pdf]
